# Supplementary material for: The effect of paclitaxel on apoptosis, autophagy and mitotic catastrophe in AGS cells
Source: PubMed Central journal article supplement (PMC8648765; doi:10.1038/s41598-021-02503-9), 2021-12-06

**The effect of paclitaxel on apoptosis, autophagy and mitotic catastrophe in AGS cells**

**Tin Myo KHING, Won Seok CHOI, Dong Min KIM, Wah Wah PO, Wynn THEIN, Chang Yell SHIN and Uy Dong SOHN\***

Laboratory of Signaling and Pharmacological Activity, Department of Pharmacology, College of Pharmacy, Chung-Ang University, Seoul, Republic of Korea

**\*Corresponding author:** Uy Dong Sohn, Professor, Ph.D., Department of Pharmacology, College of Pharmacy, Chung-Ang University, Seoul, 06974, Republic of Korea. Tel.: +82 28205614, Fax: 011 +8228268752, e-mail: [udsohn@cau.ac.kr](mailto:udsohn@cau.ac.kr)



**Fig.2d**

Caspase -3

Cleaved Caspase 3

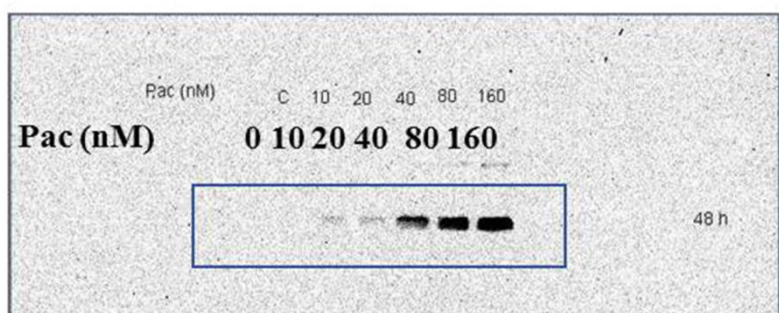

Procaspase 3

Pac (nM) 0 10 20 40 80 160

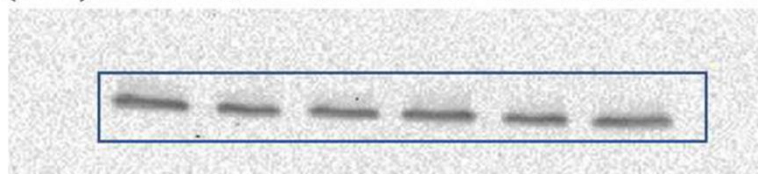

$\beta$ -Actin

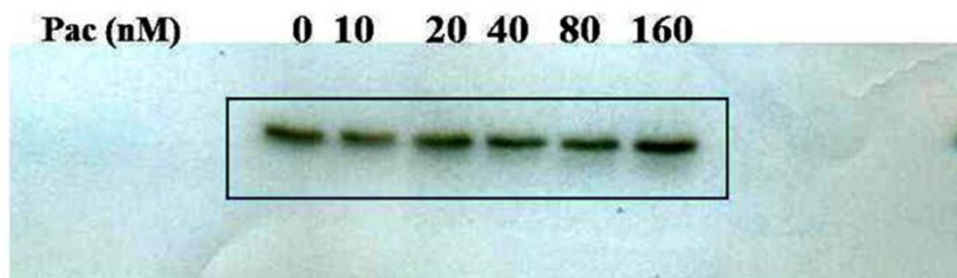

PARP

PARP  
Cleaved PARP

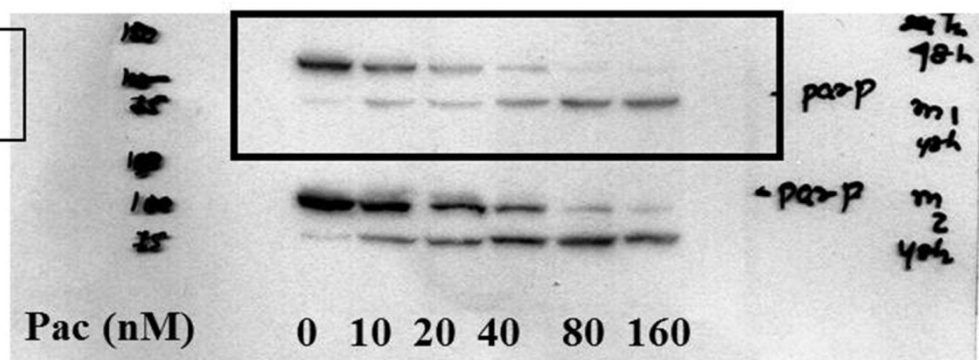

$\beta$ -Actin

Pac (nM) 0 10 20 40 80 160

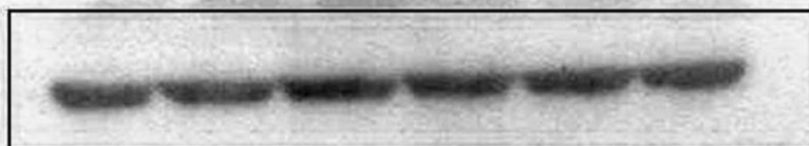

Supplementary Fig. B

**Fig. B** Photographs of the full-length blots described in Figure 3

**Fig. 3b**

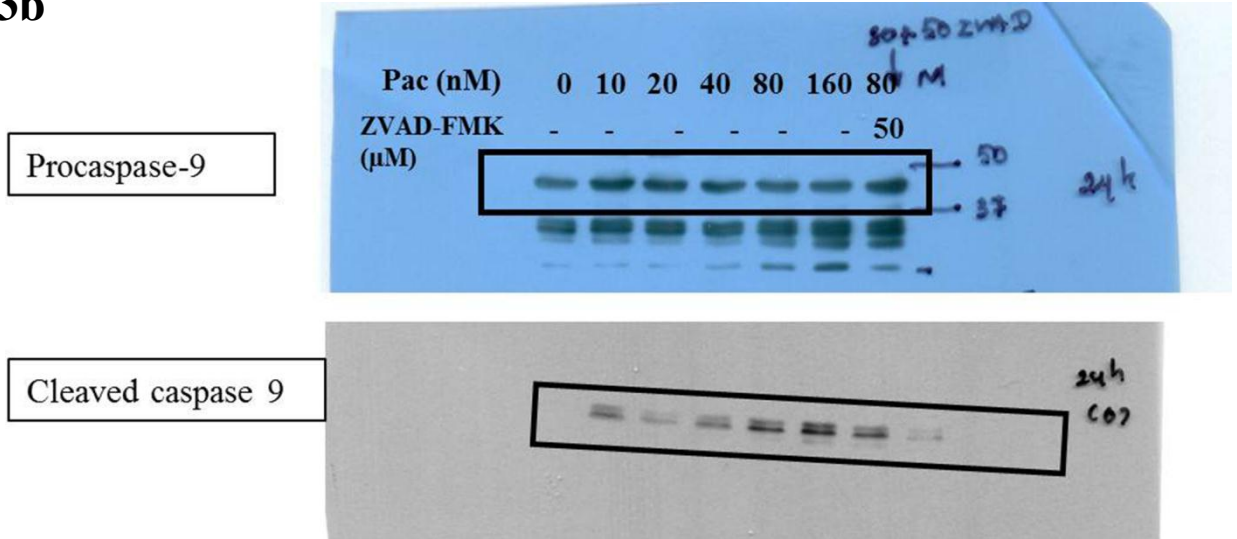

**Fig. 3c**

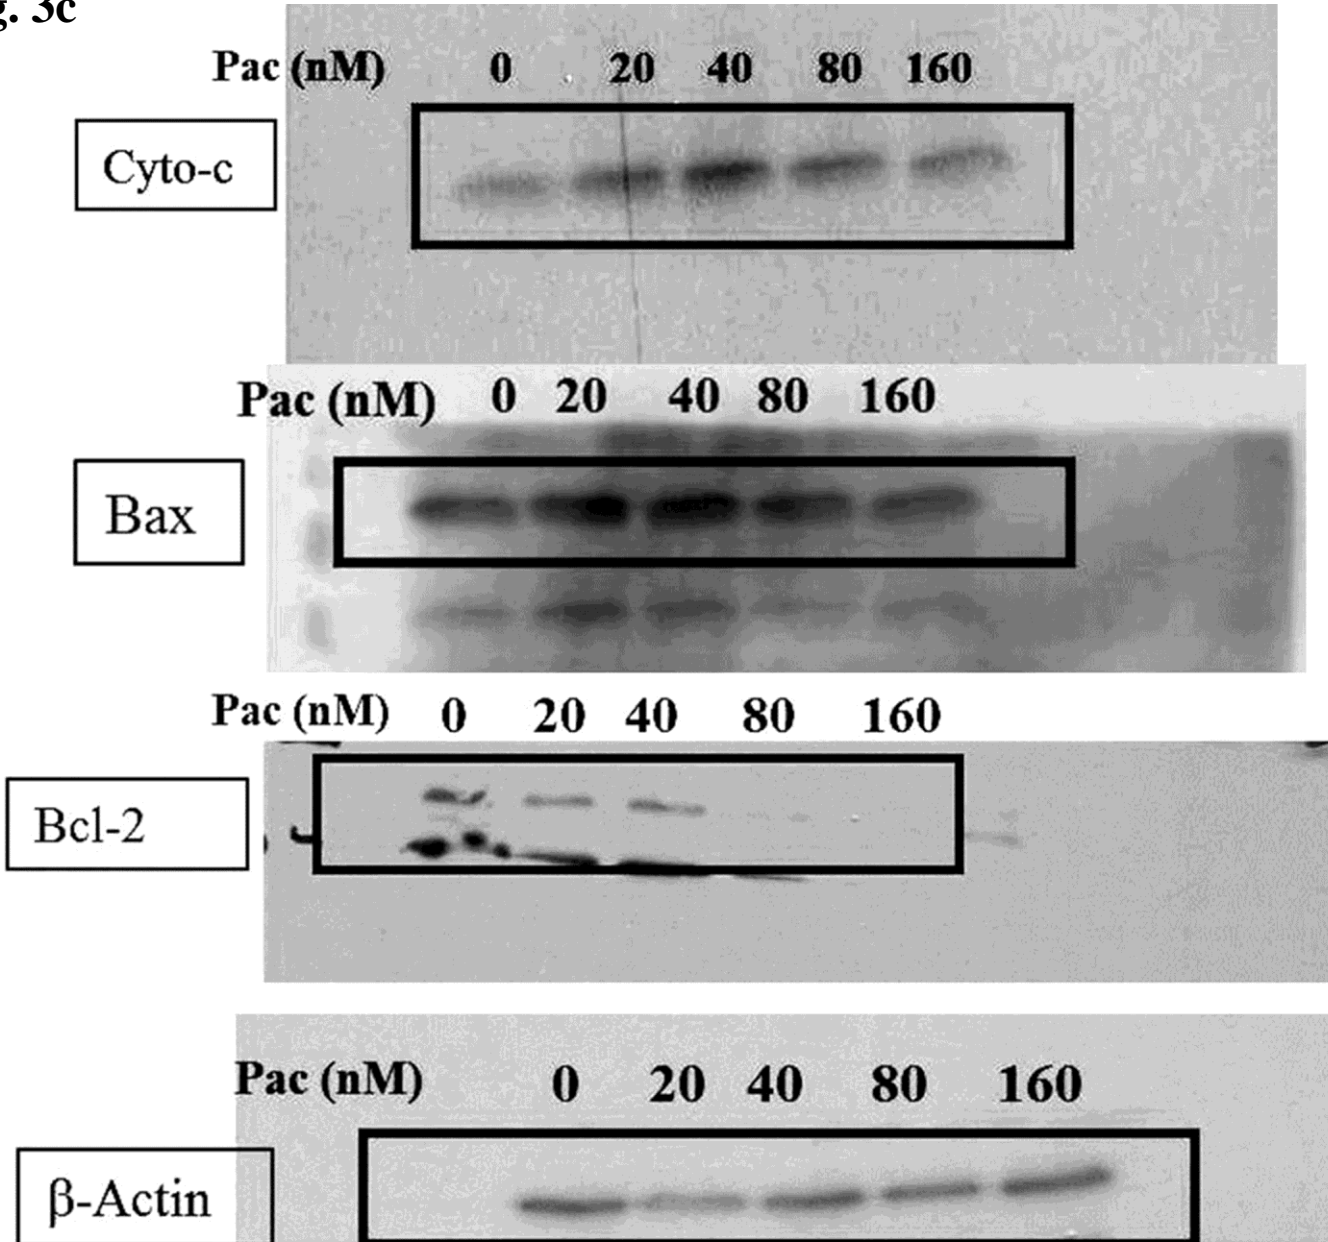

**Fig.3d**

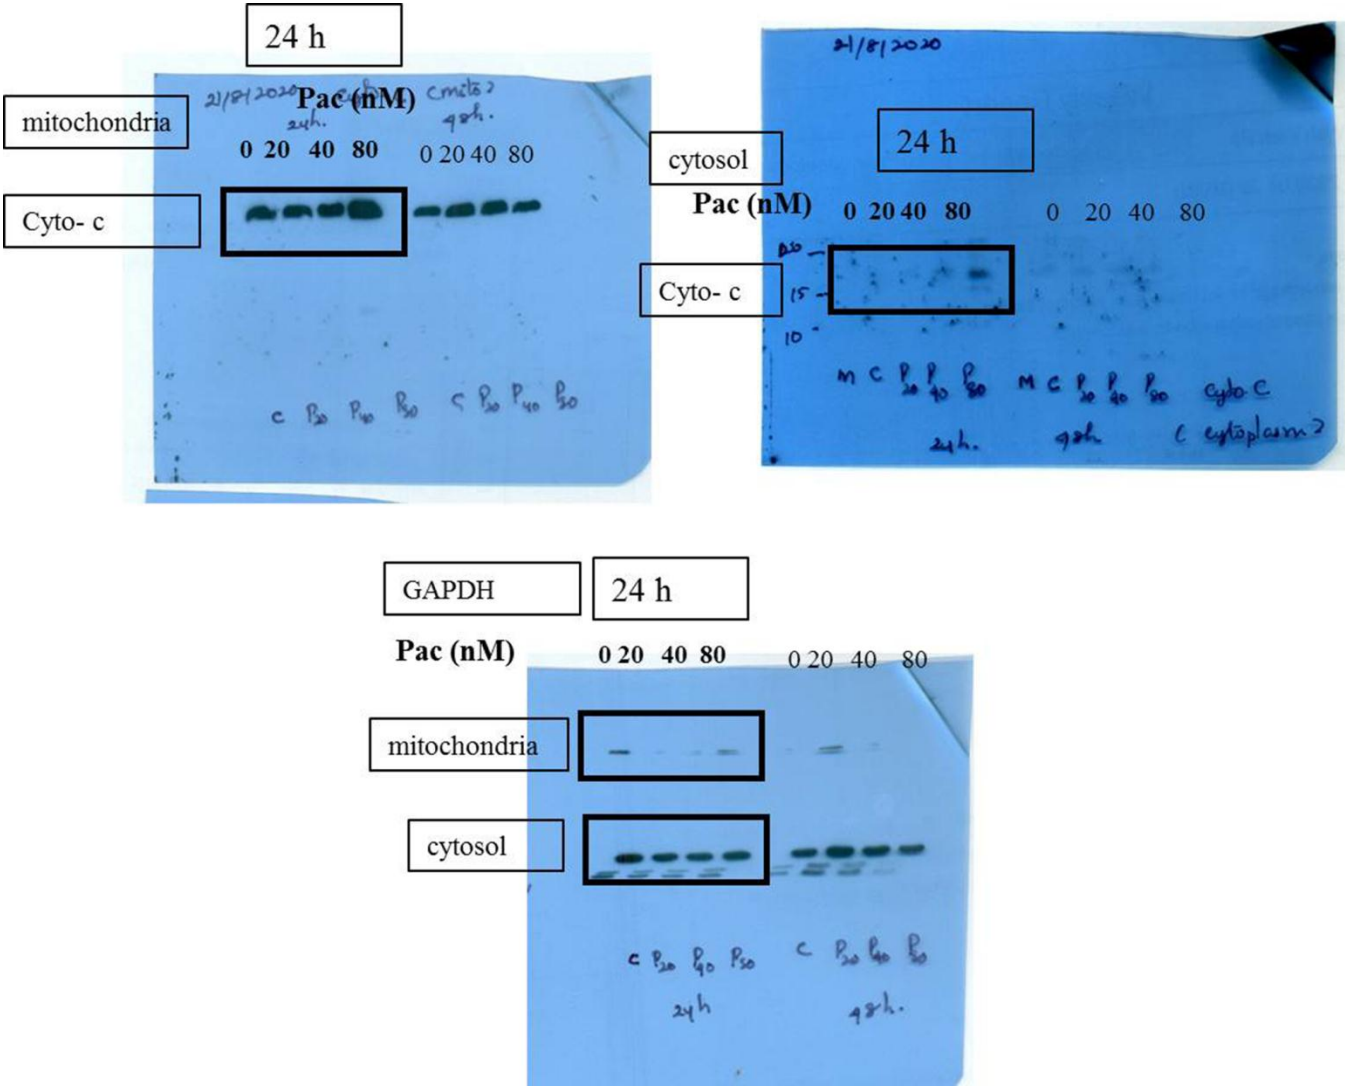

**Fig. 3f**

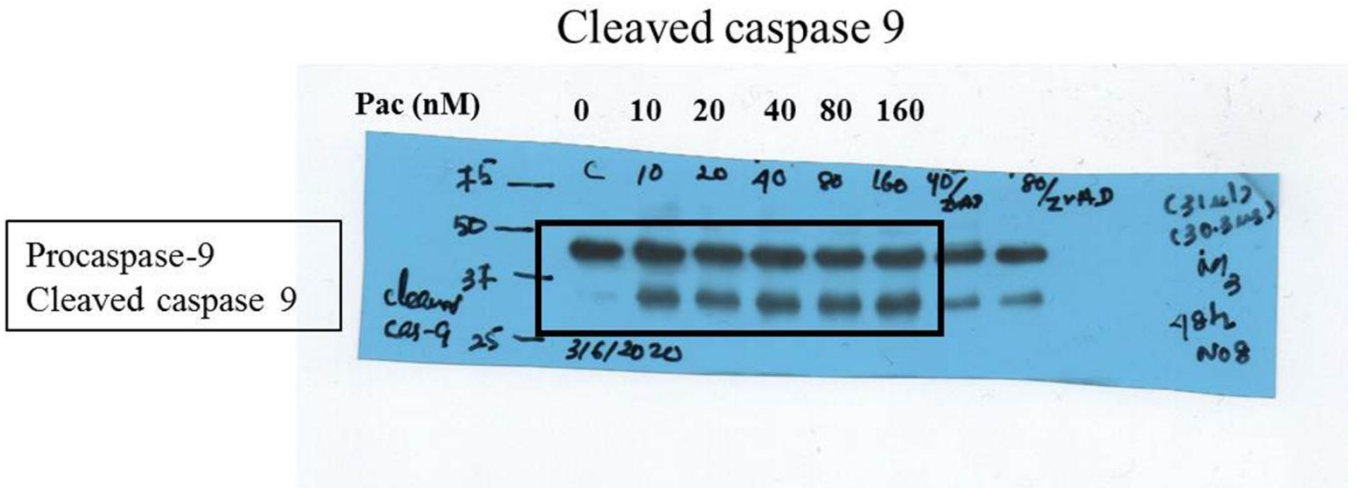

**Fig. 3g**

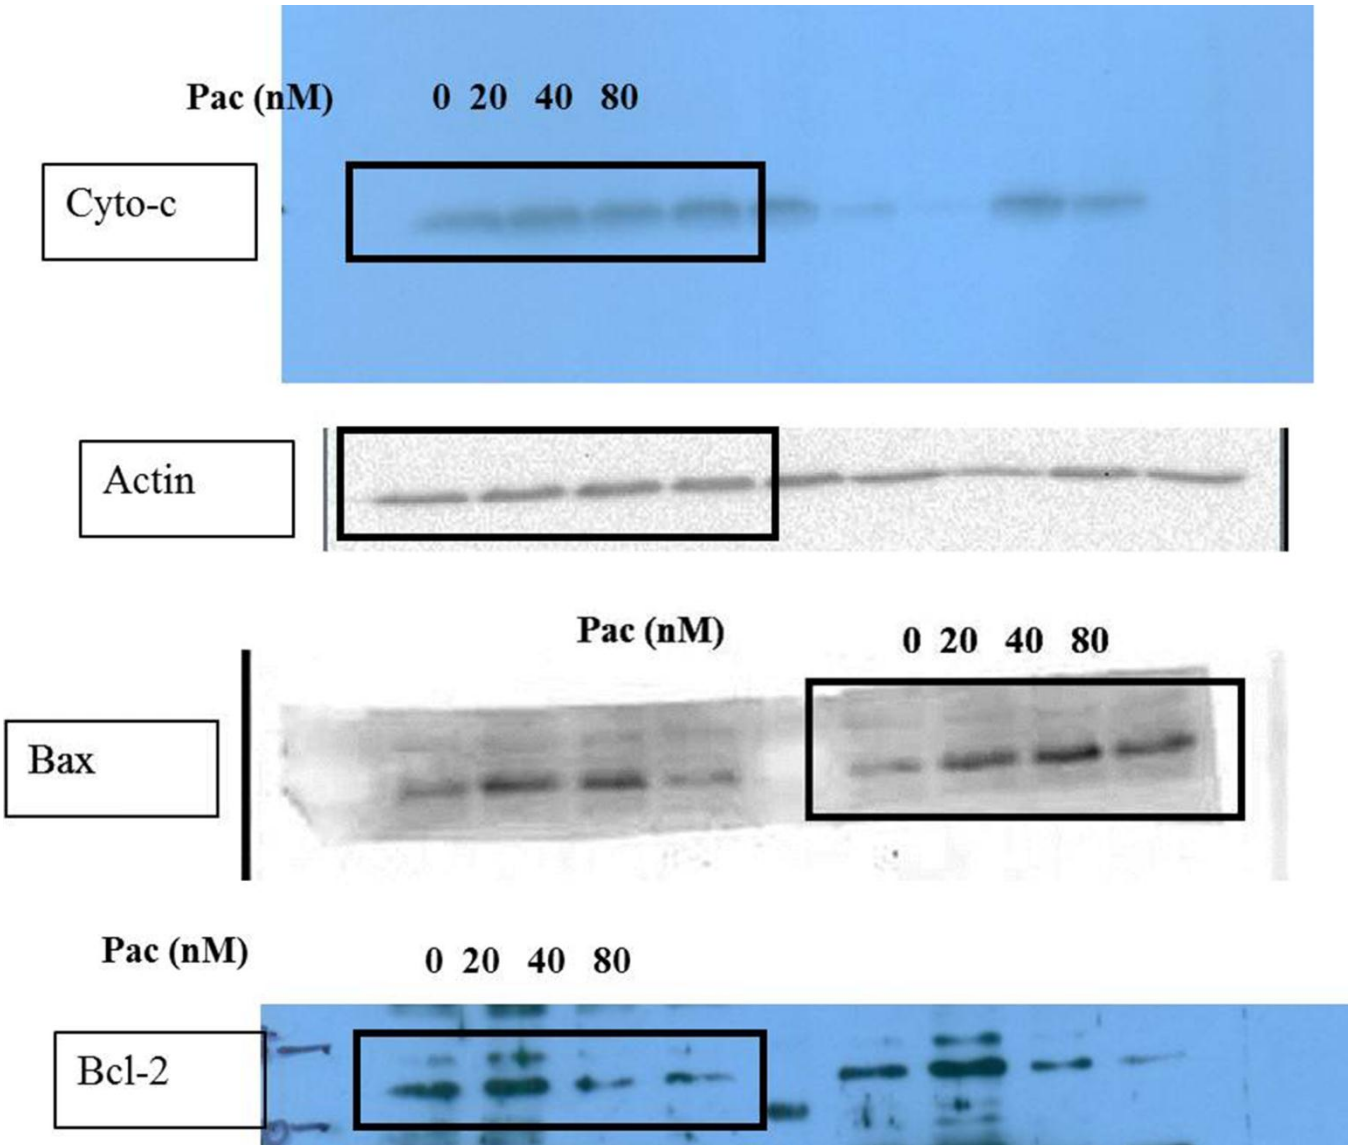

**Fig. 3h**

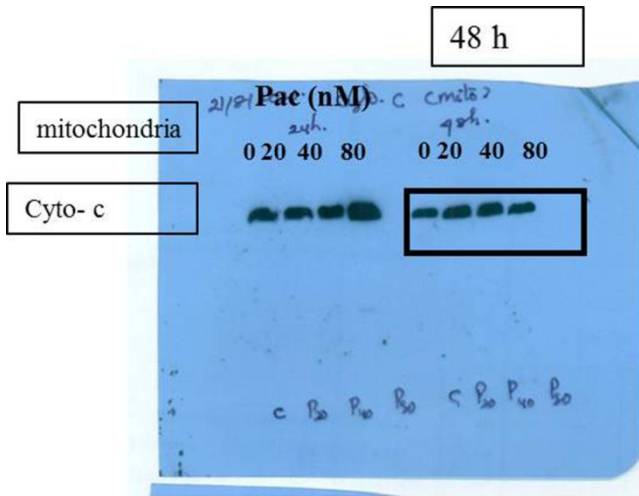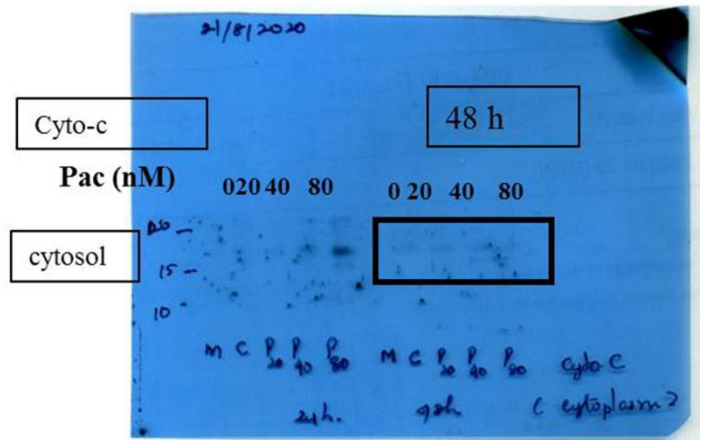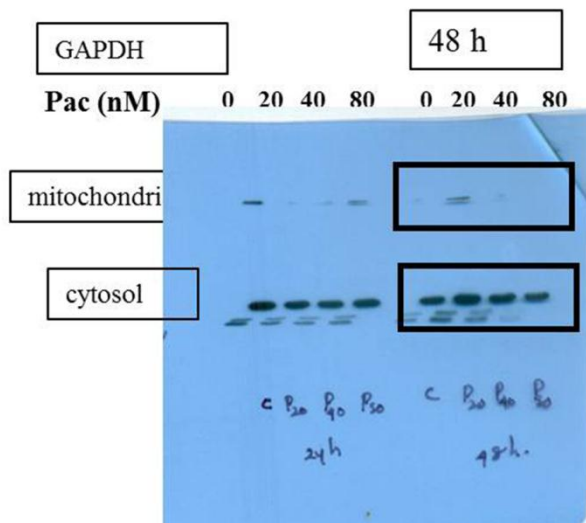

Supplementary Fig. C

**Fig. C** Photographs of the full-length blots described in Figure 4

**Fig. 4a**

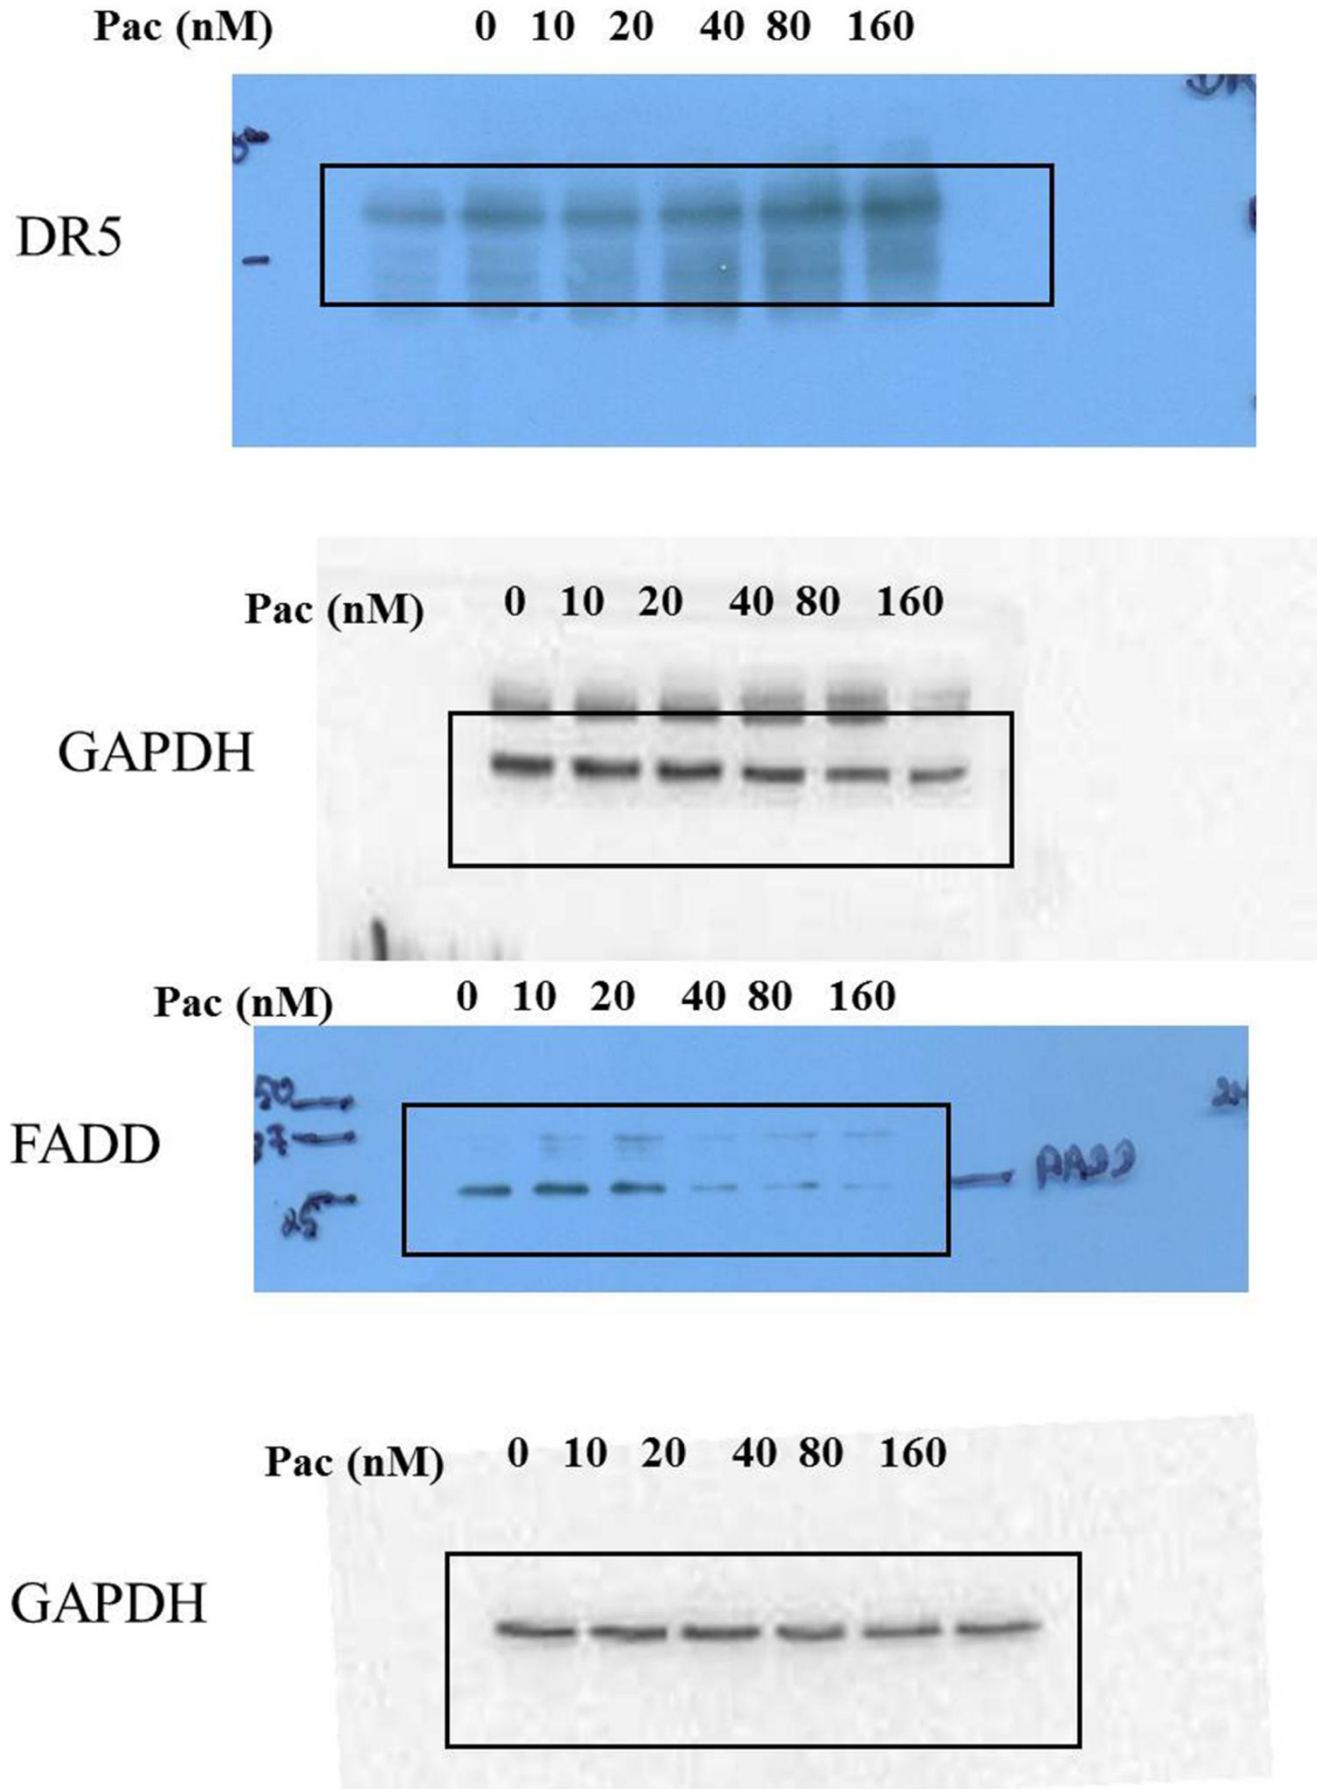



**Fig.4b**

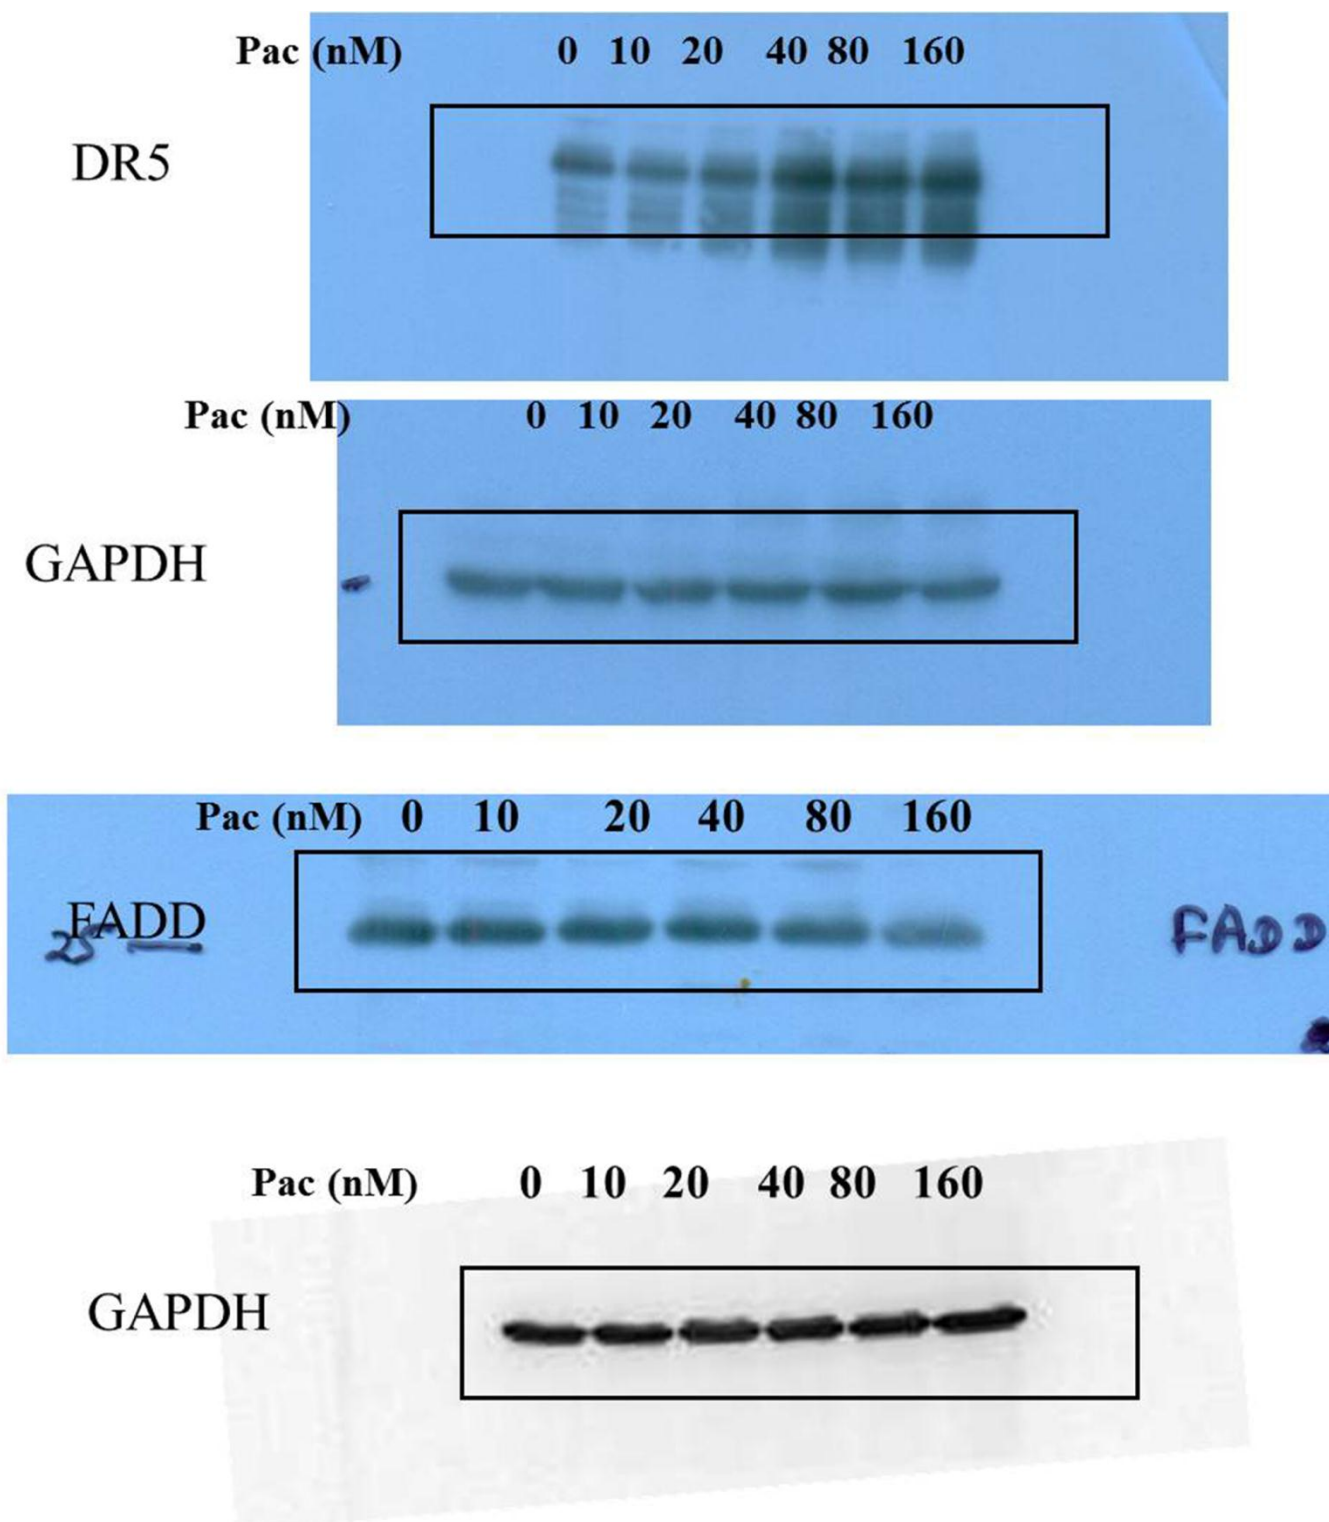

**Fig. 4c**

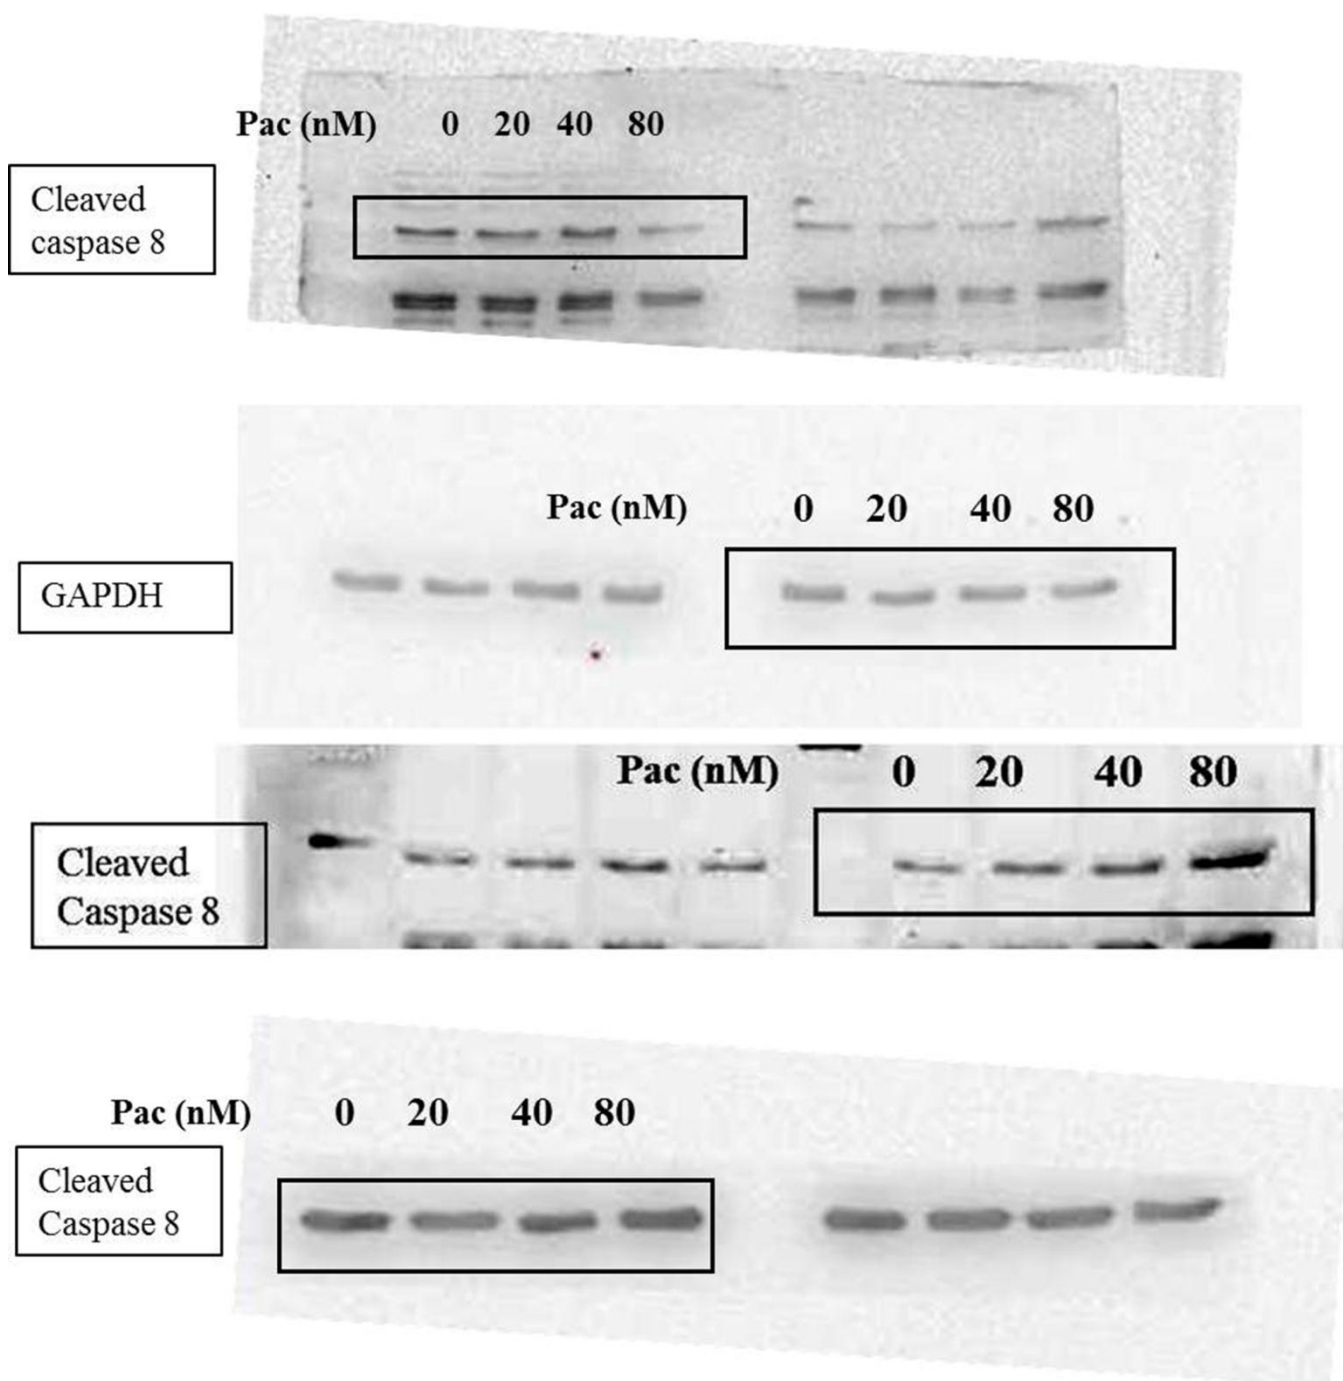

Supplementary Fig. D

**Fig.D** Photographs of the full-length blots described in Figure 5

**Fig. 5c**

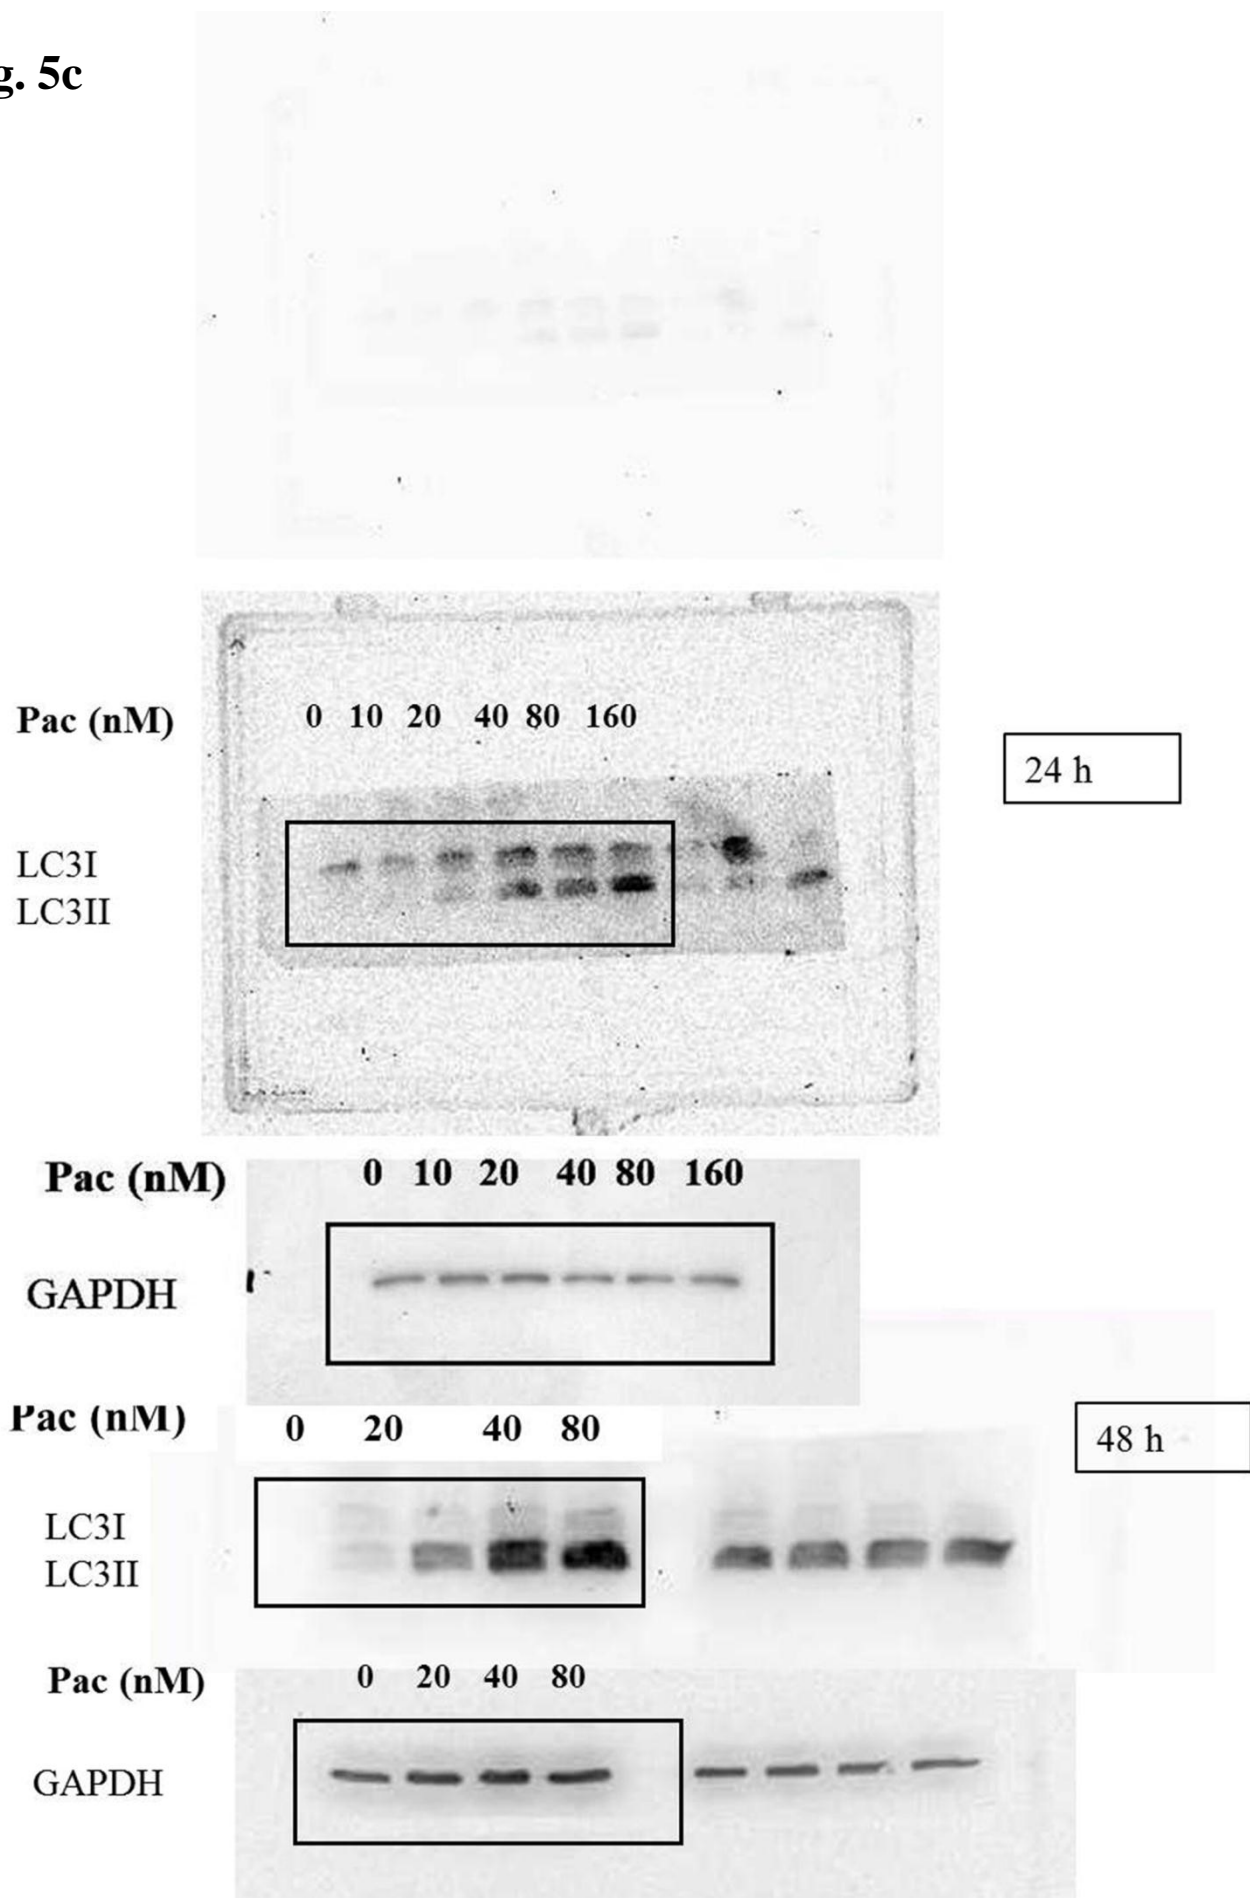

**Fig. 5d****Pac (nM) 0 20 40 80**

24 h

PI3KIII

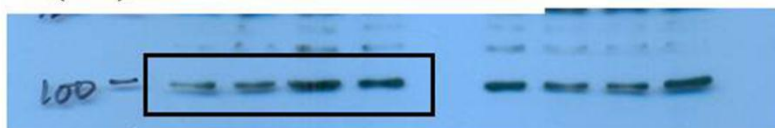

Beclin-1

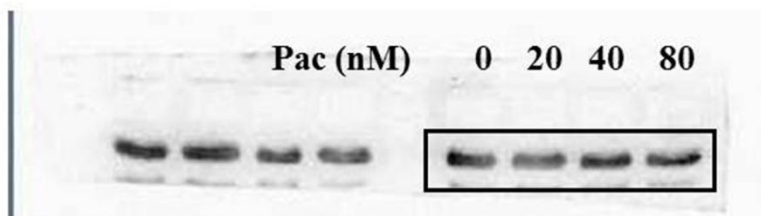

GAPDH

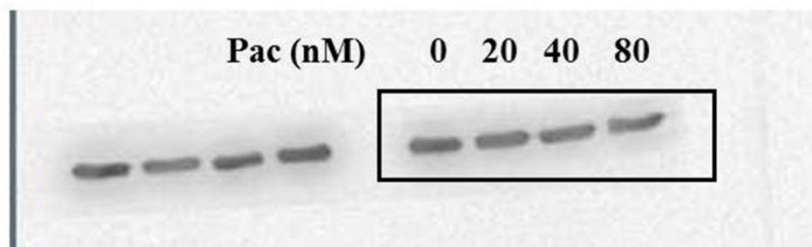

Atg 5

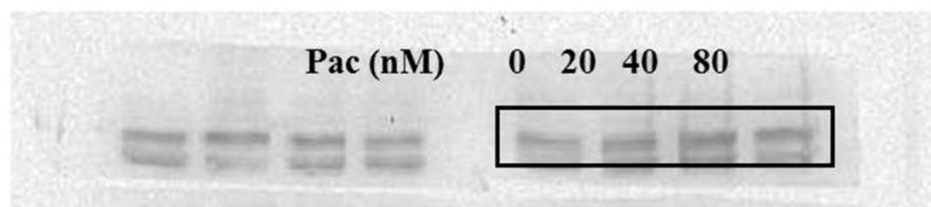

48 h

**Pac (nM)****0 20 40 80**

PI3KIII

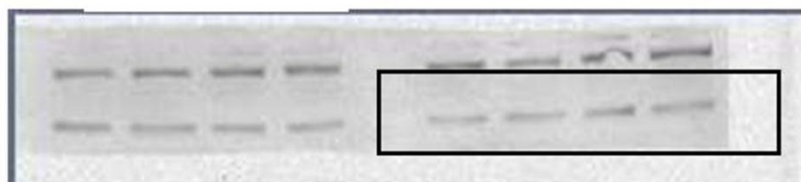

Beclin1

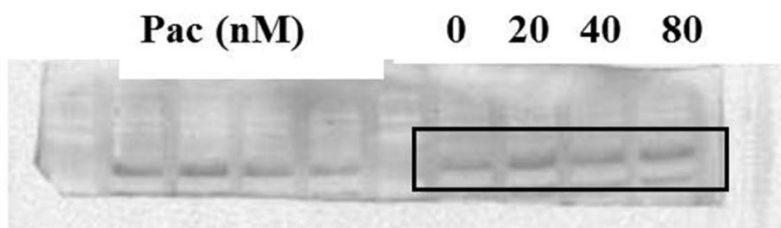

GAPDH

**Pac (nM)****0 20 40 80**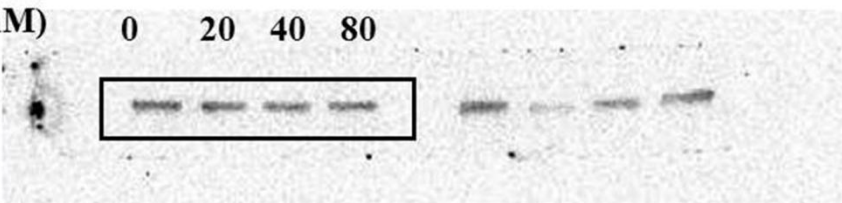

Atg5

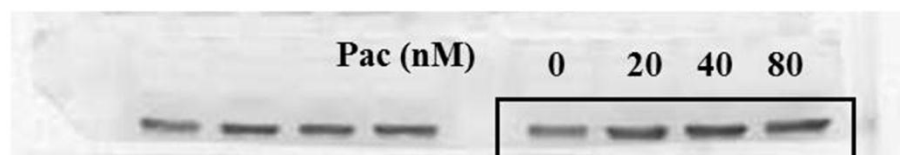

**Fig. 5e**

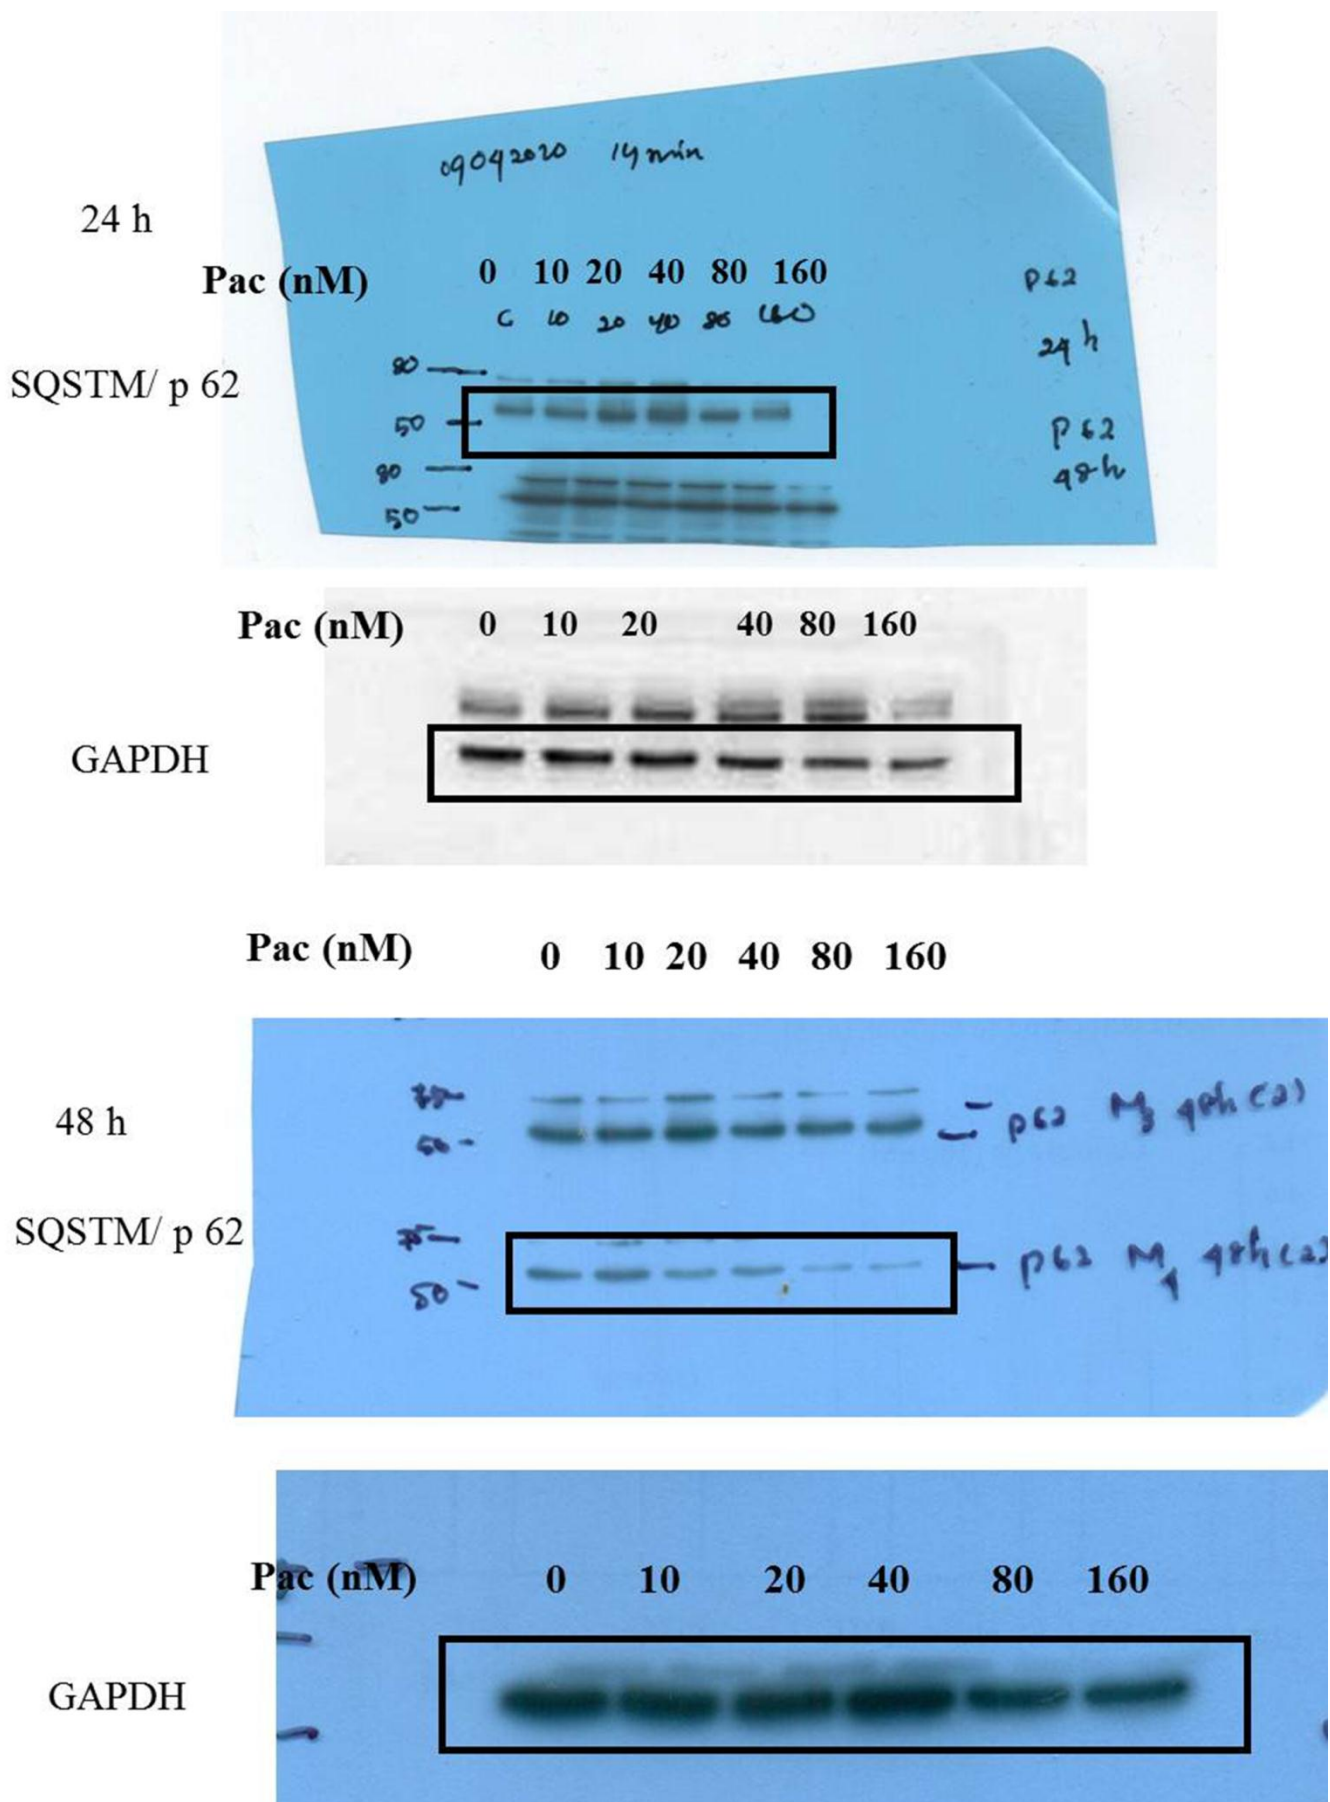

**Fig. 5f**

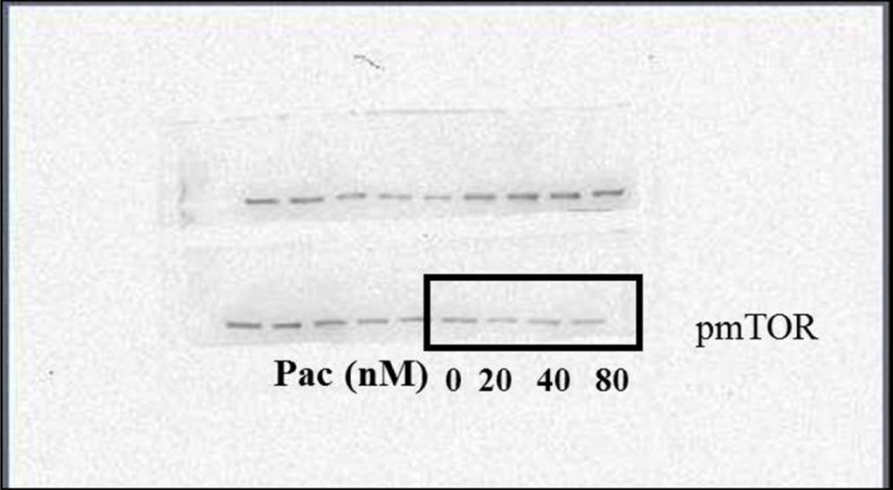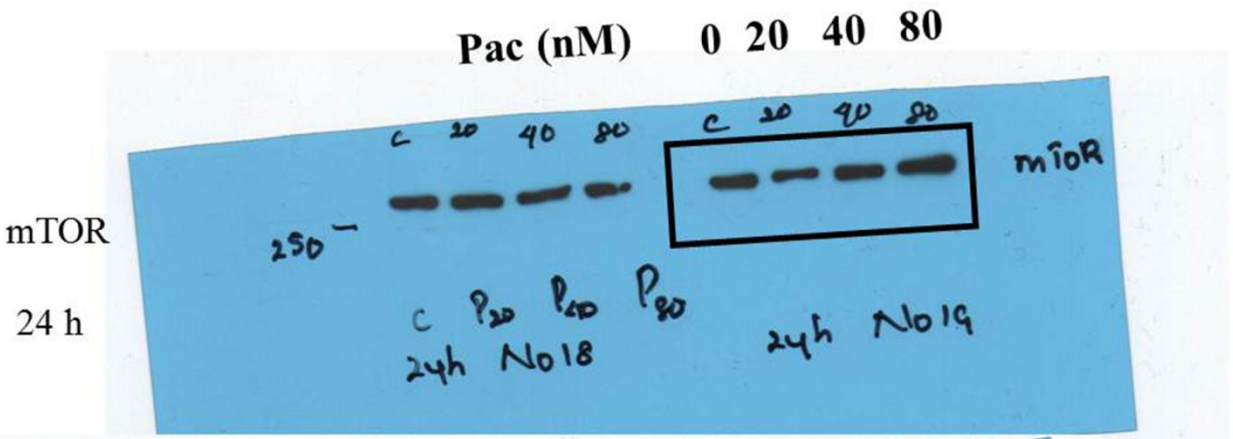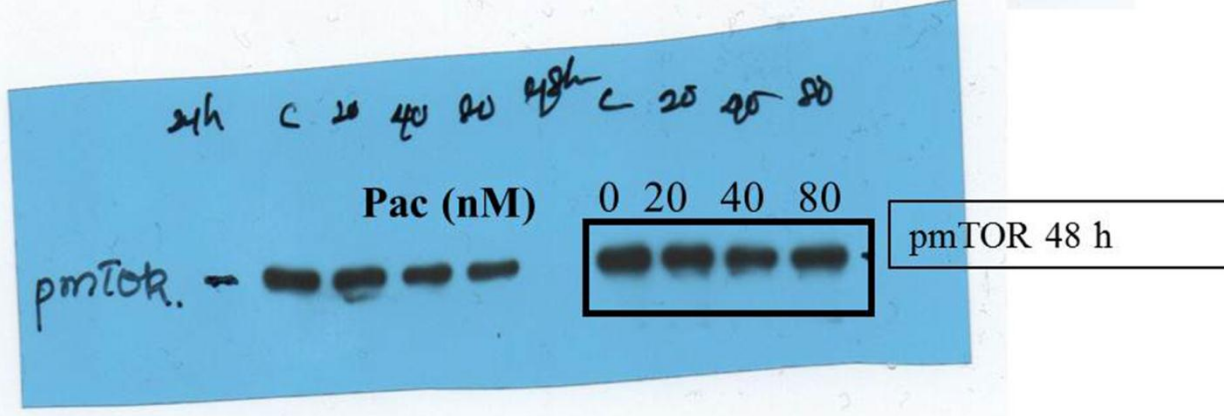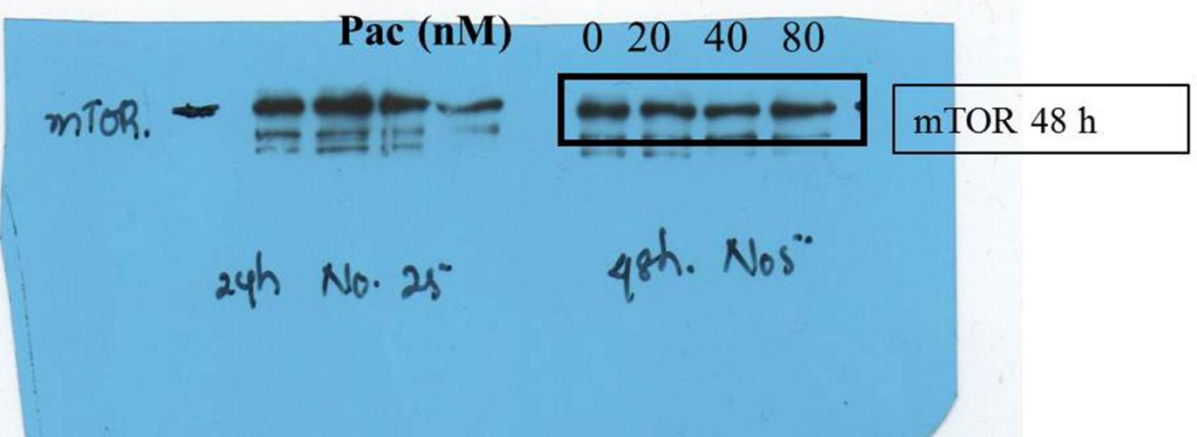

**Fig. 5g**

|          |   |    |    |    |    |    |     |
|----------|---|----|----|----|----|----|-----|
| Pac (nM) | 0 | 20 | 40 | 80 | 40 | 40 | 40  |
| 3MA (mM) | 0 | 0  | 0  | 0  | 5  | 0  | 0   |
| Baf (nM) | 0 | 0  | 0  | 0  | 0  | 0  | 100 |

LC3B II

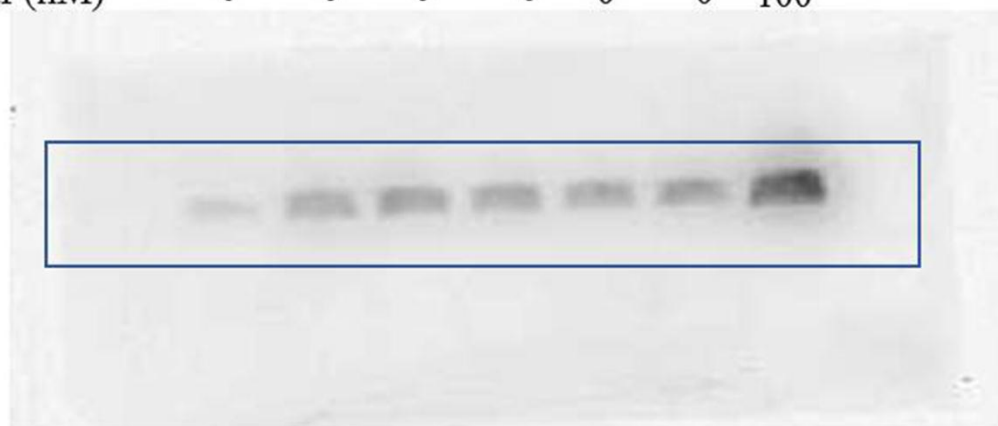

$\beta$ -Actin

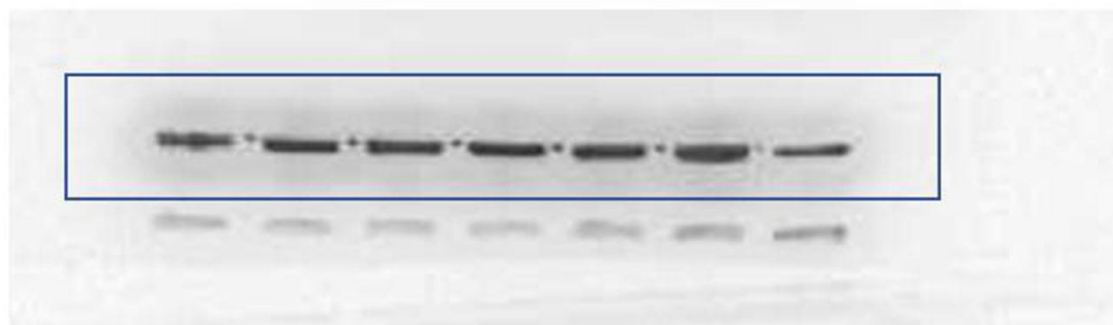

**Fig. E** Photographs of the full-length blots described in Figure 6

**Fig. 6b**

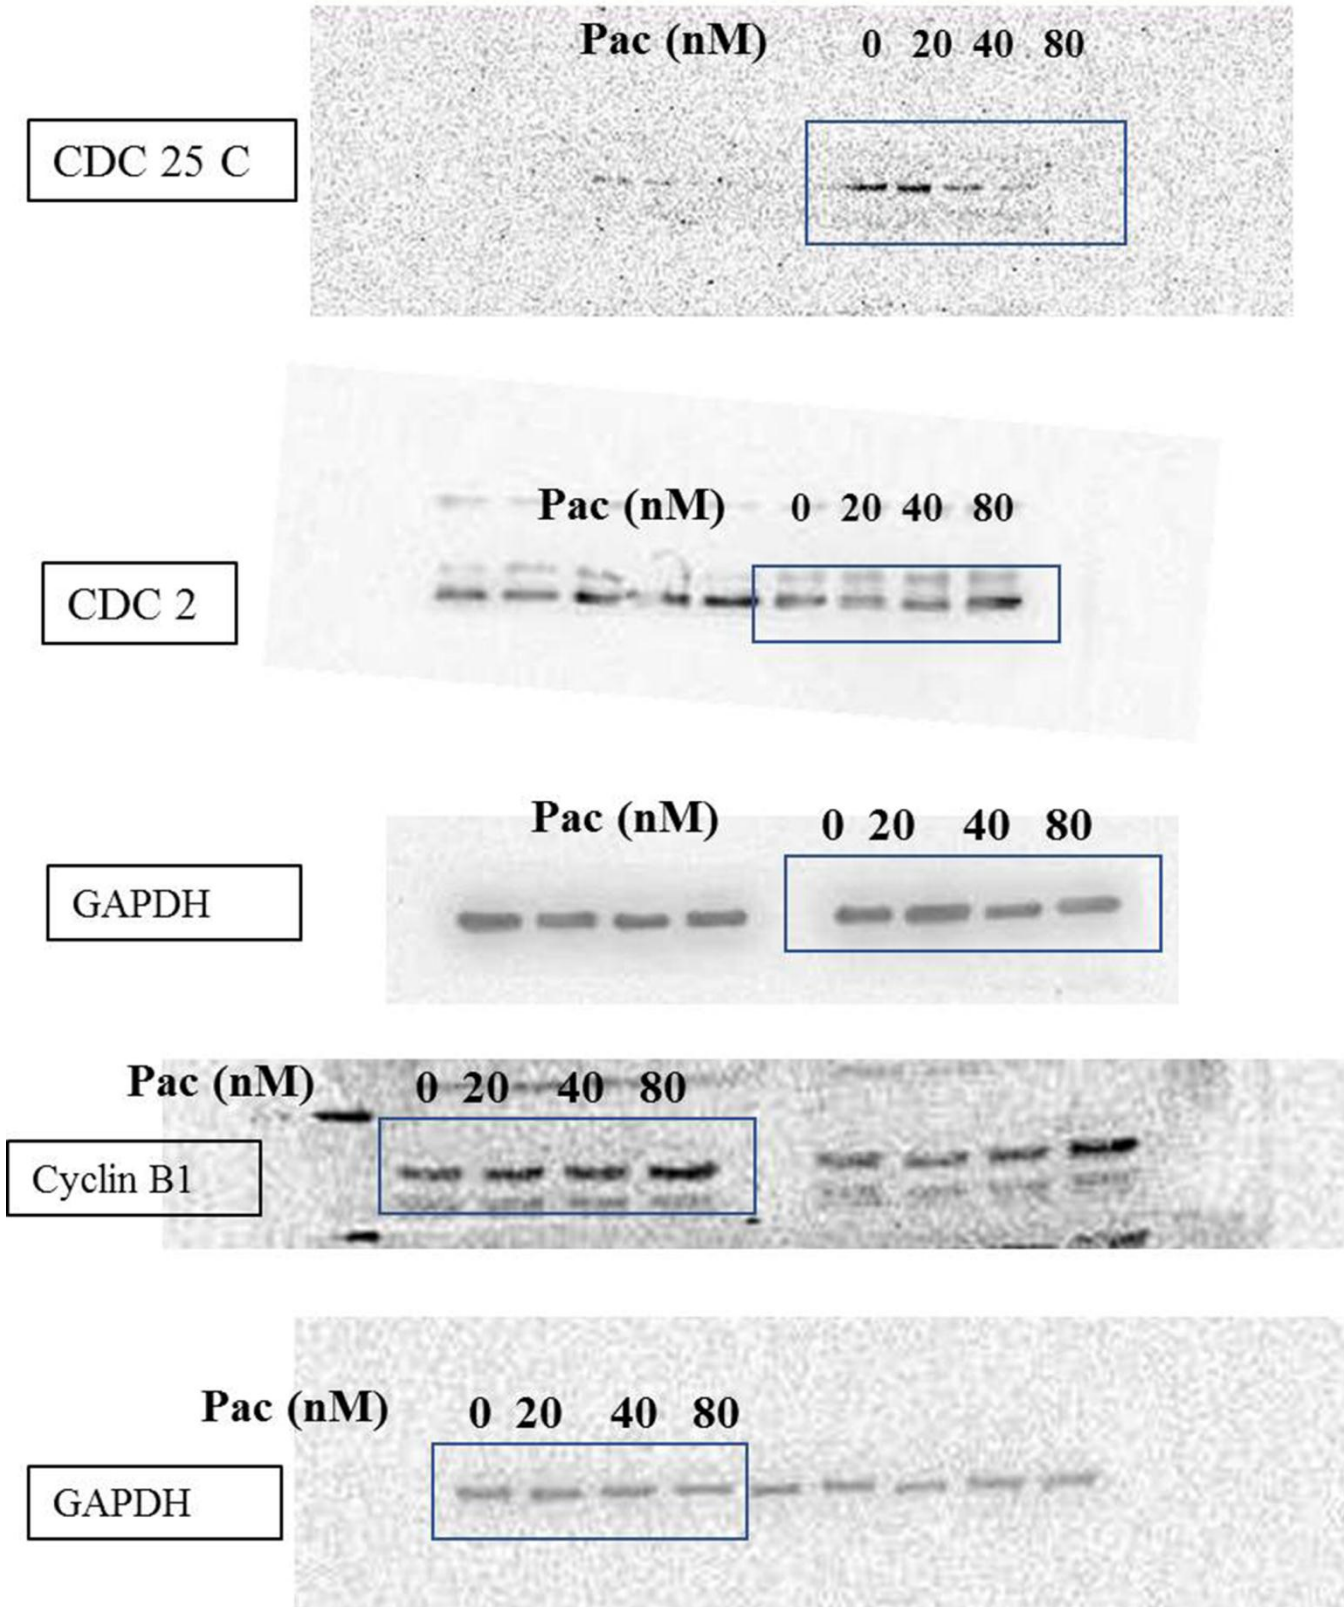



**Fig. 6d**

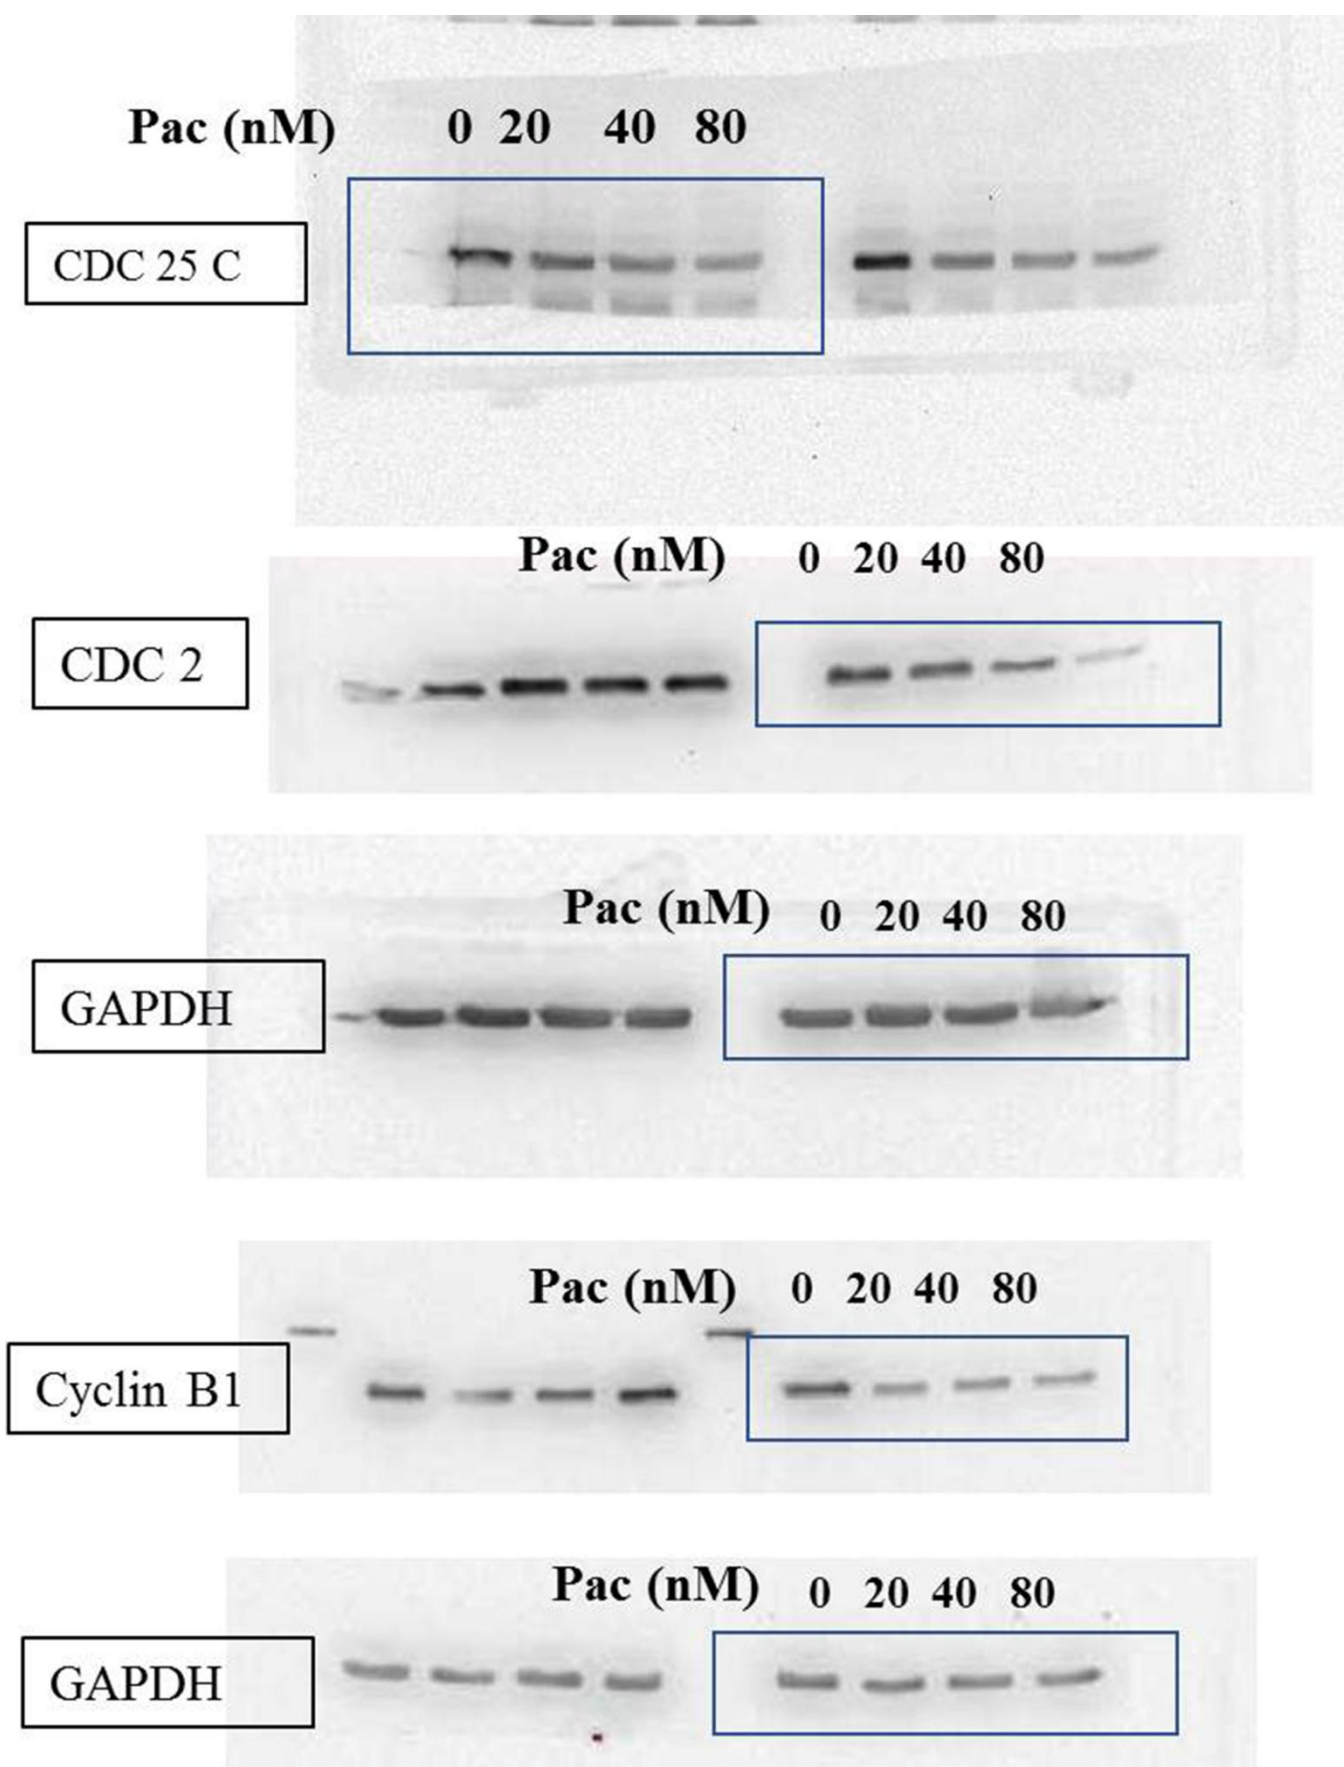

Supplementary Fig. F

**Fig. F** Photographs of the full-length blots described in Figure 7

**Fig. 7f**

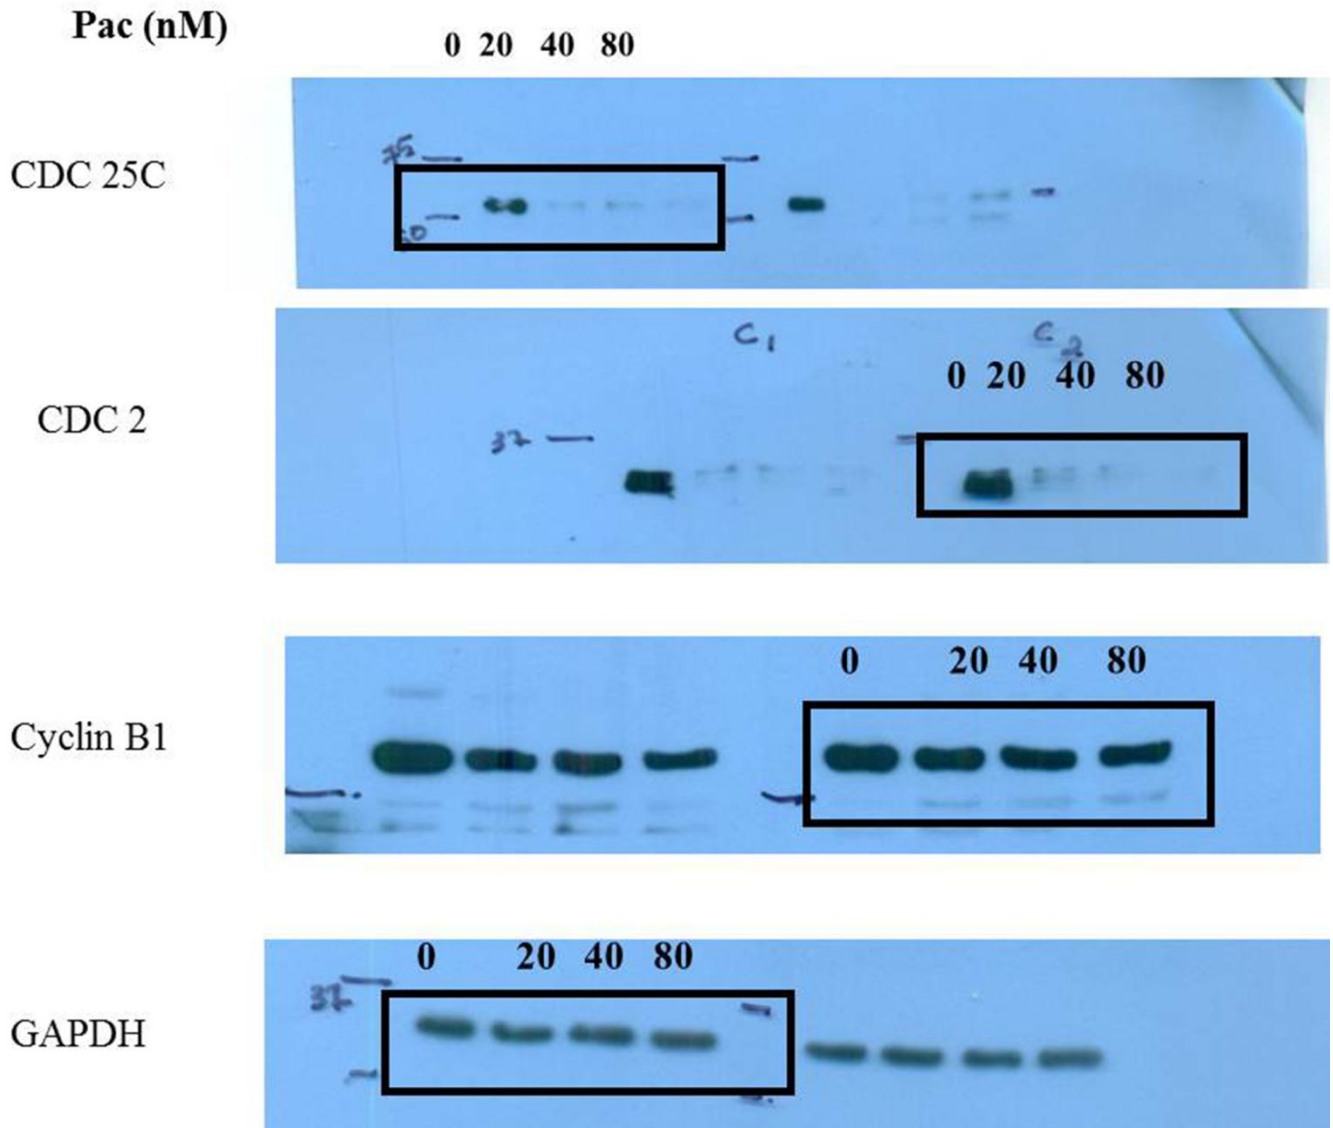

**Fig. 7g**

Lamin B1

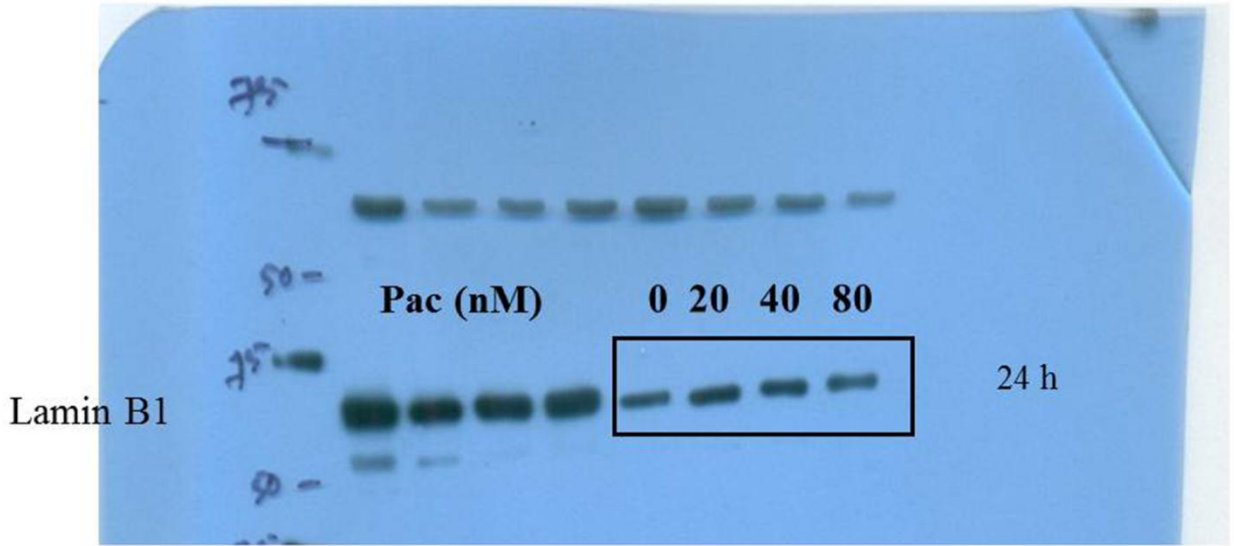

Pac (nM) 0 20 40 80

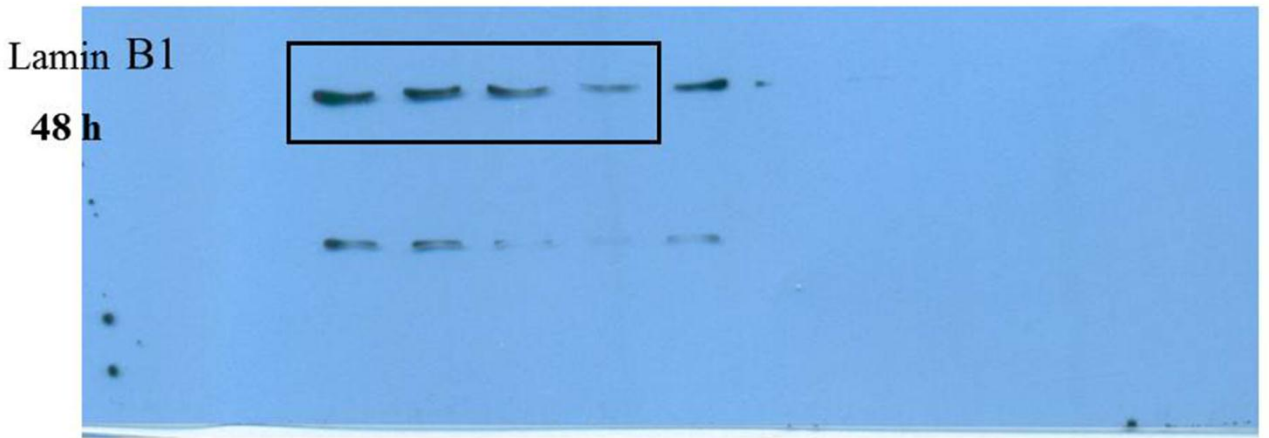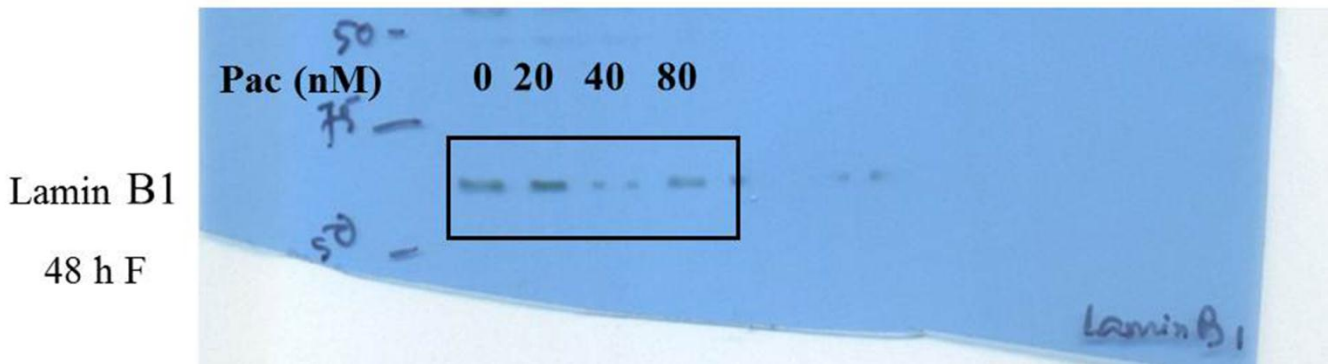

**Fig. 7h**

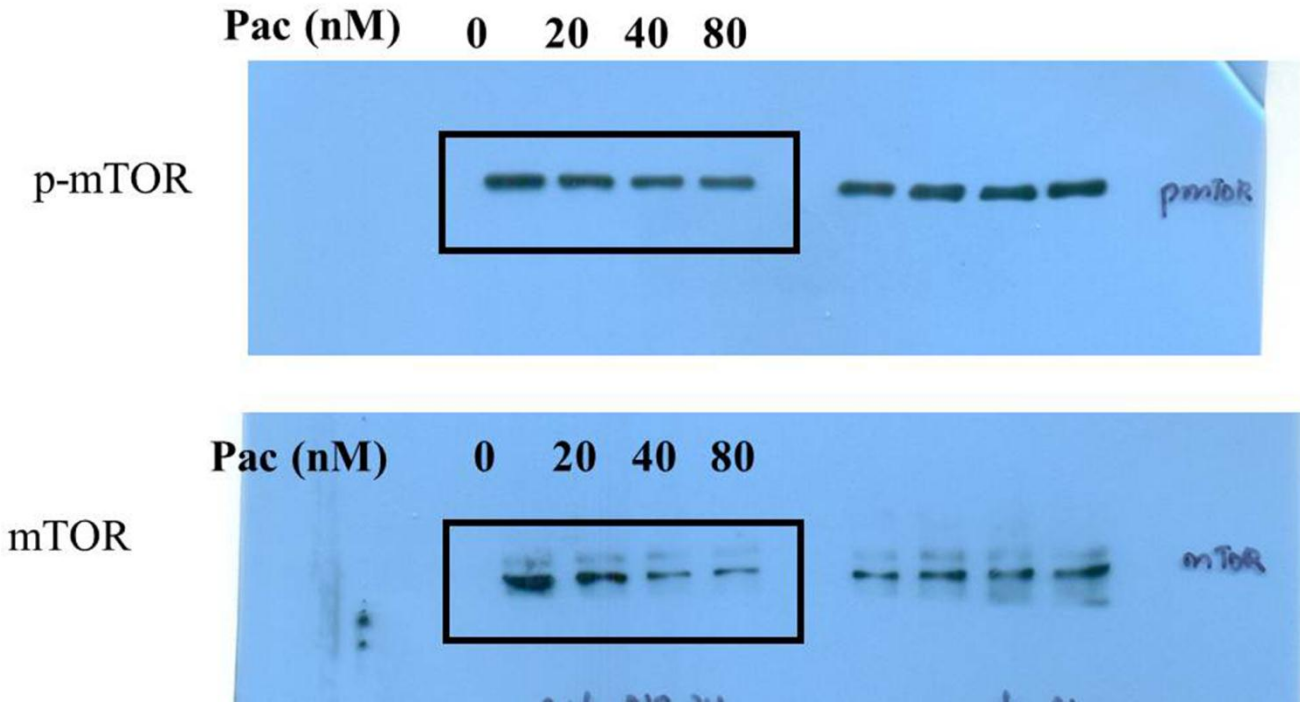

Supplement: 41598_2021_2503_MOESM1_ESM.pdf [file 41598_2021_2503_MOESM1_ESM.pdf]
