# Supplementary material for: The effect of paclitaxel on apoptosis, autophagy and mitotic catastrophe in AGS cells
Source: PubMed Central journal article supplement (PMC8648765; doi:10.1038/s41598-021-02503-9), 2021-12-06

**The effect of paclitaxel on apoptosis, autophagy and mitotic catastrophe in AGS cells**

**Tin Myo KHING, Won Seok CHOI, Dong Min KIM, Wah Wah PO, Wynn THEIN, Chang Yell SHIN and Uy Dong SOHN\***

Laboratory of Signaling and Pharmacological Activity, Department of Pharmacology, College of Pharmacy, Chung-Ang University, Seoul, Republic of Korea

**\*Corresponding author:** Uy Dong Sohn, Professor, Ph.D., Department of Pharmacology, College of Pharmacy, Chung-Ang University, Seoul, 06974, Republic of Korea. Tel.: +82 28205614, Fax: 011 +8228268752, e-mail: [udsohn@cau.ac.kr](mailto:udsohn@cau.ac.kr)

Supporting Data

Fig. AA Photographs of the replicated full-length blots described in Figure 2

Fig.2b

Cleaved cas 3

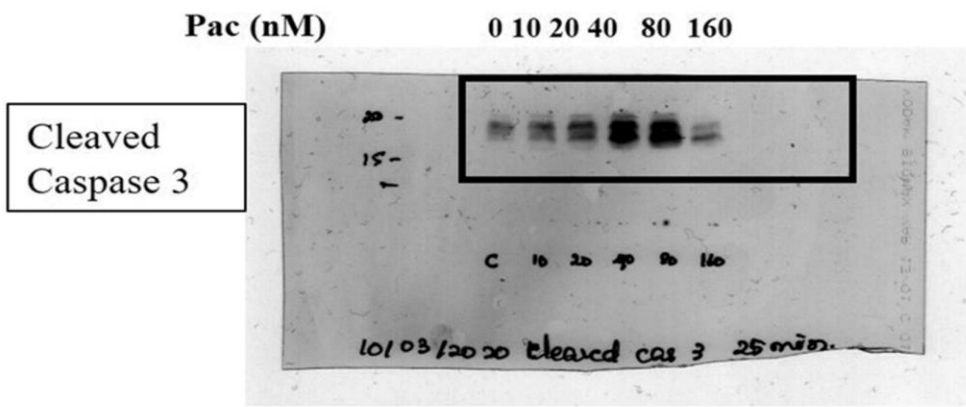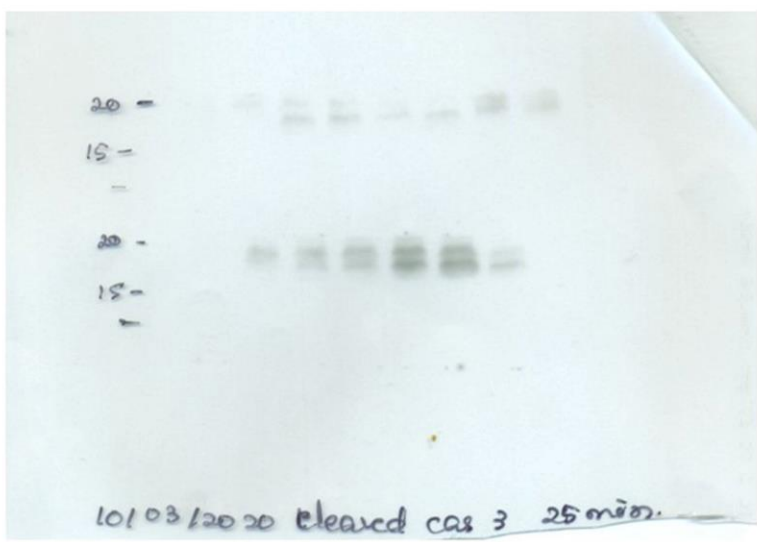

Cleaved cas 3

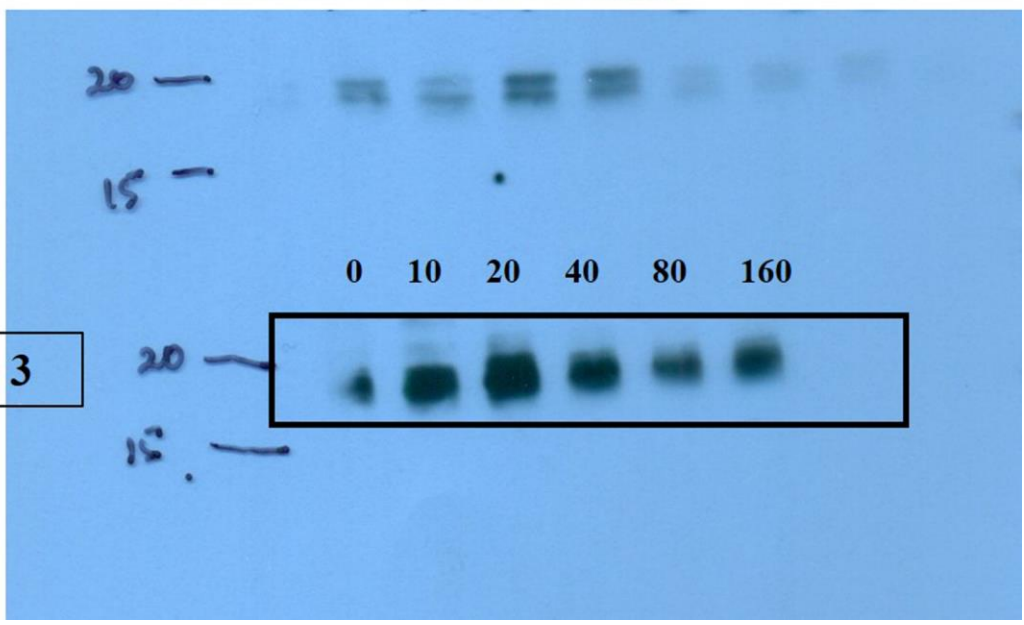

## Cleaved cas 3

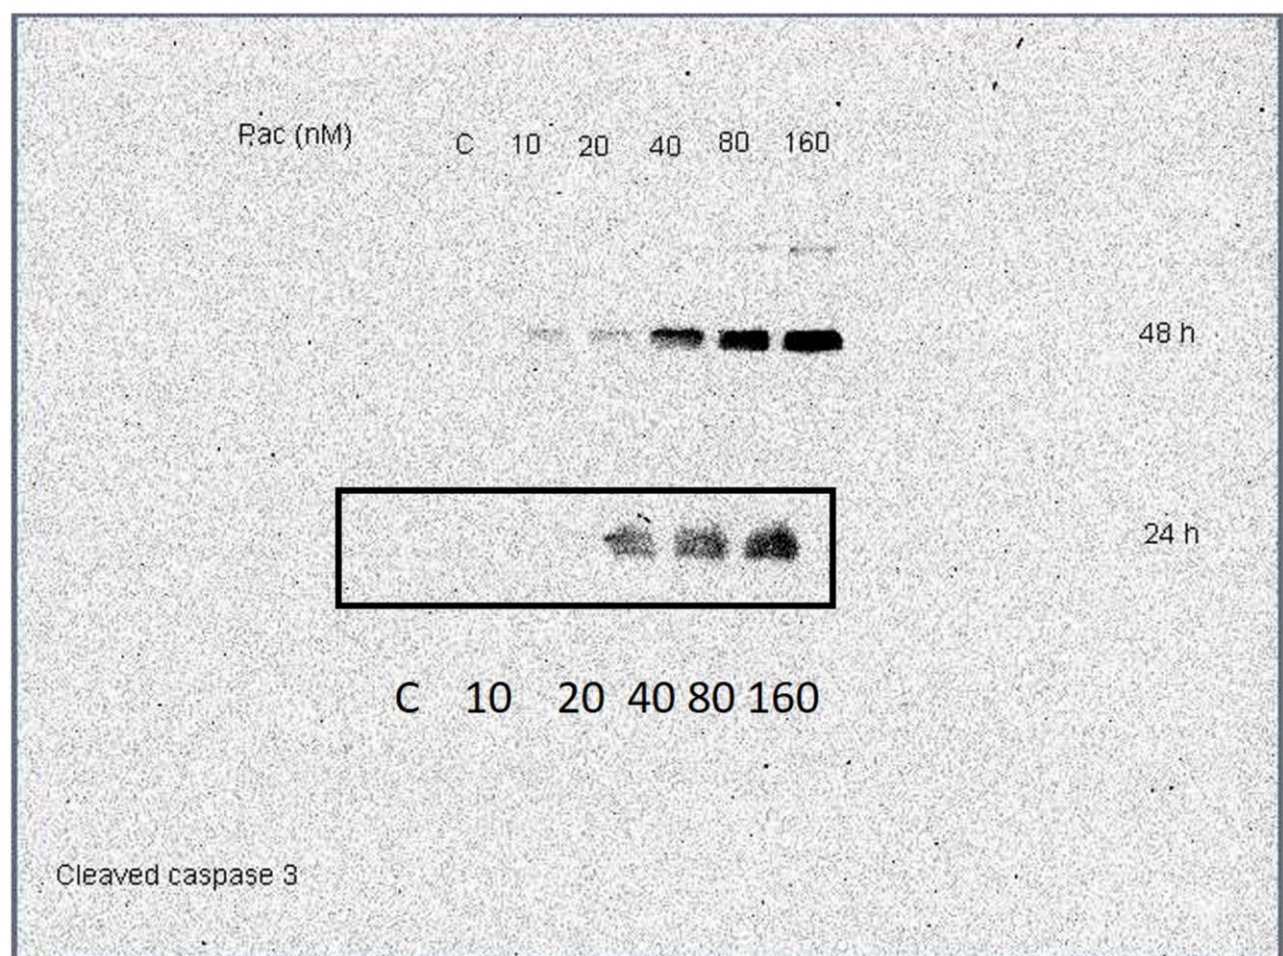

# Procaspase-3

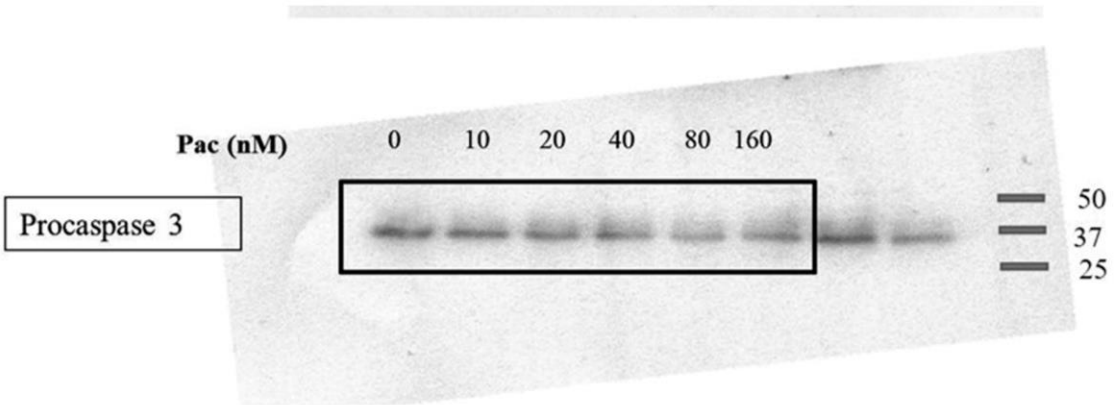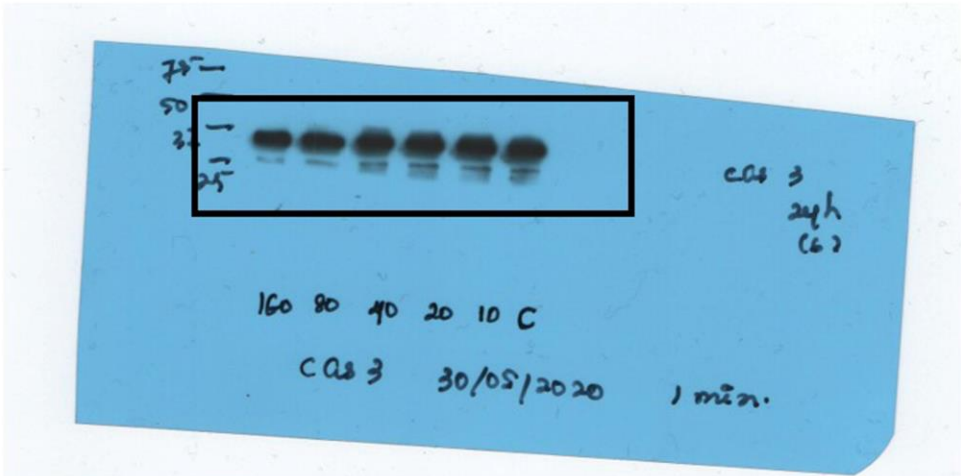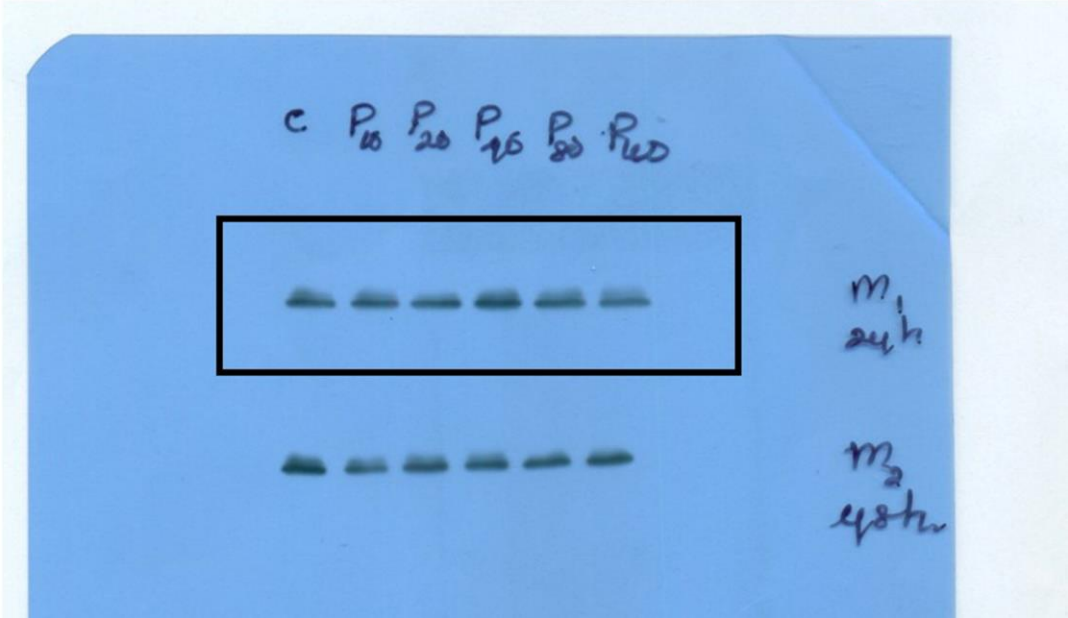

**$\beta$ -Actin**

Pac (nM)

**$\beta$ -Actin**

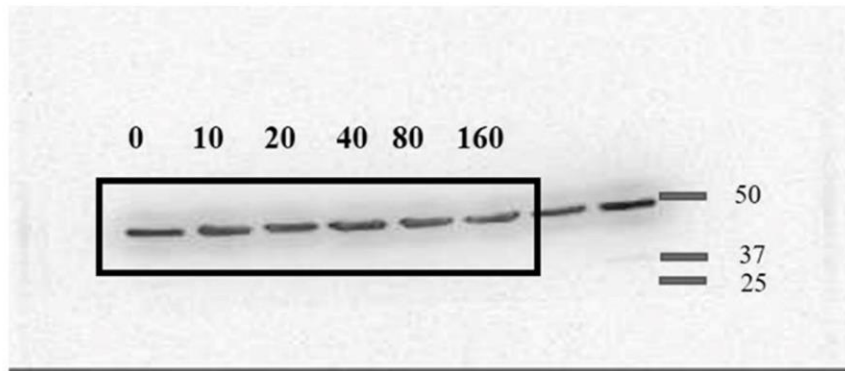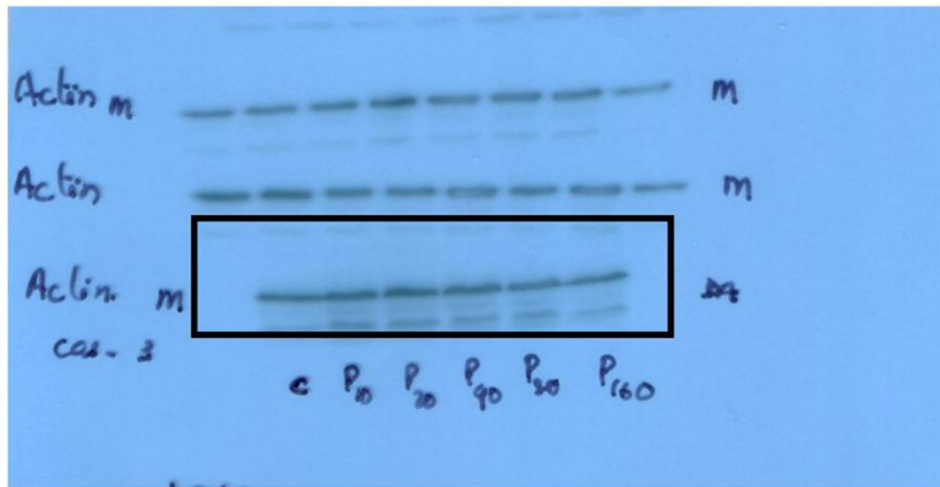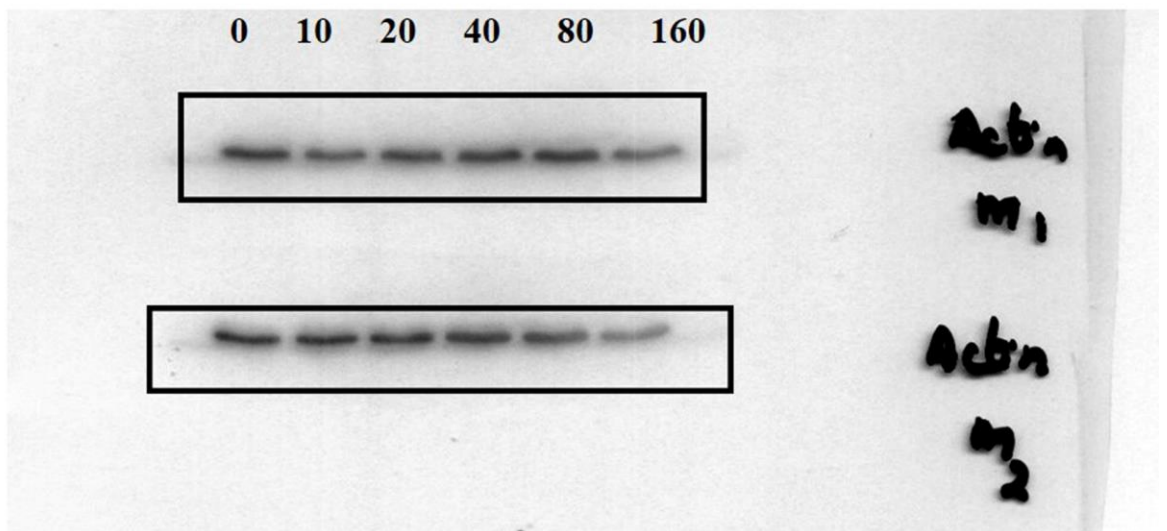

**PARP**

22/02/2020

C P<sub>10</sub> P<sub>20</sub> P<sub>40</sub> P<sub>80</sub> P<sub>160</sub> PARP  
5 min.

C 10 20 40 80 160

PARP  
Cleaved PARP

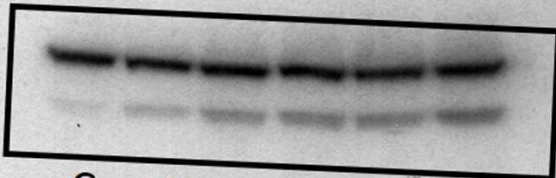

No.1 <sup>m</sup><sub>6</sub>

PARP  
Cleaved PARP

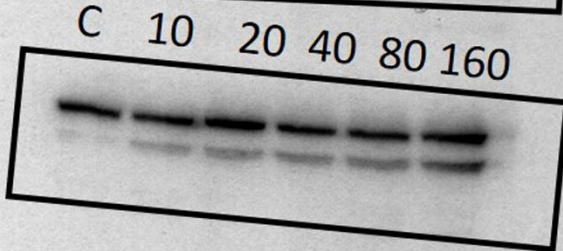

No.2 <sup>m</sup><sub>3</sub>

PARP  
Cleaved PARP

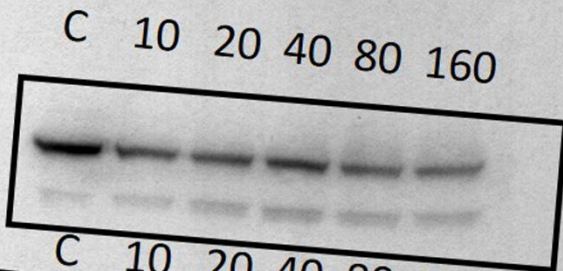

No.3 <sup>m</sup><sub>5</sub>

PARP  
Cleaved PARP

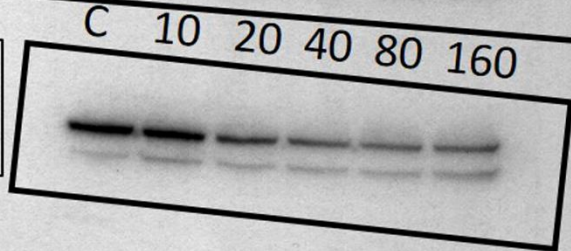

No.4 <sup>m</sup><sub>1</sub>

24 h

C= Control  
P10= Paclitaxel 10nM  
P20= Paclitaxel 20nM  
P40= Paclitaxel 40nM  
P80= Paclitaxel 80nM  
P160= Paclitaxel 160nM

**Fig.2d**

**Caspase -3**

Cleaved Caspase 3

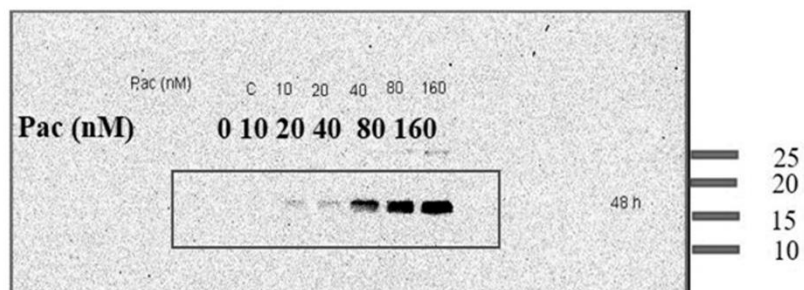

Procaspase 3

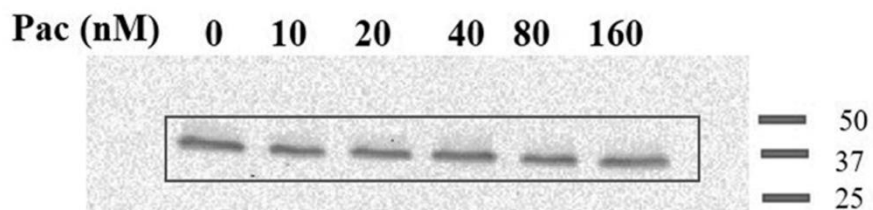

$\beta$ -Actin

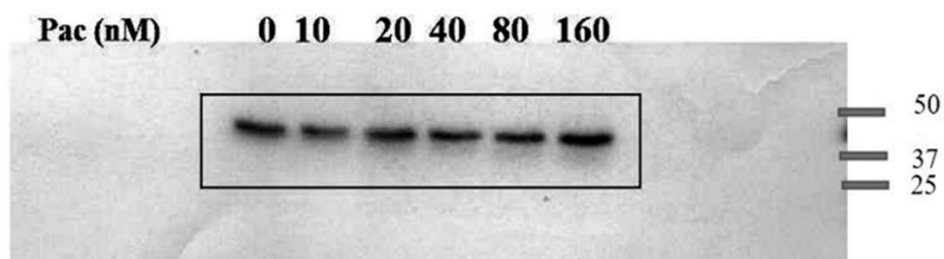

**PARP**

PARP  
Cleaved PARP

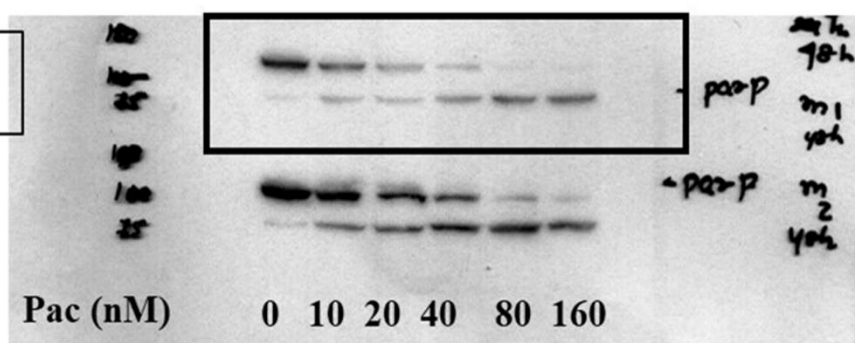

$\beta$ -Actin

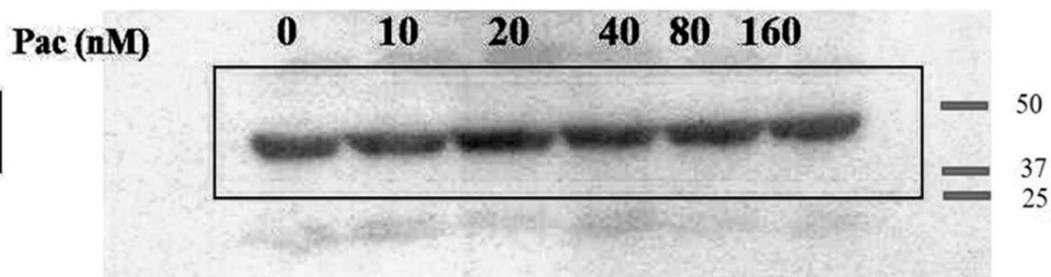

Cleaved cas 3

Pac (nM)

0 10 20 40 80 160

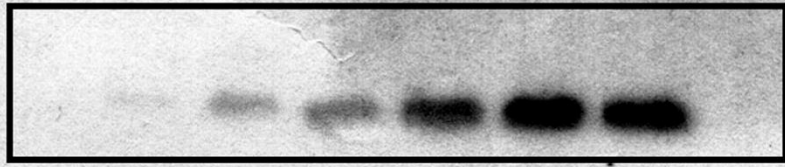

Pac (nM)

0 10 20 40 80 160 40

ZVADfmk (μM)

0 0 0 0 0 0 40

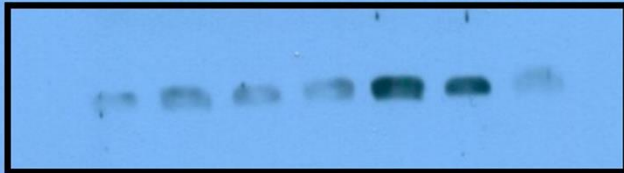

cleaved.  
cas 3.

0 10 20 40 80 160

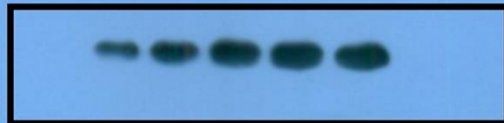

m<sub>3</sub>  
48h.

cleaved cas 3. 16/03/2020 28 min



## Cleaved cas 3

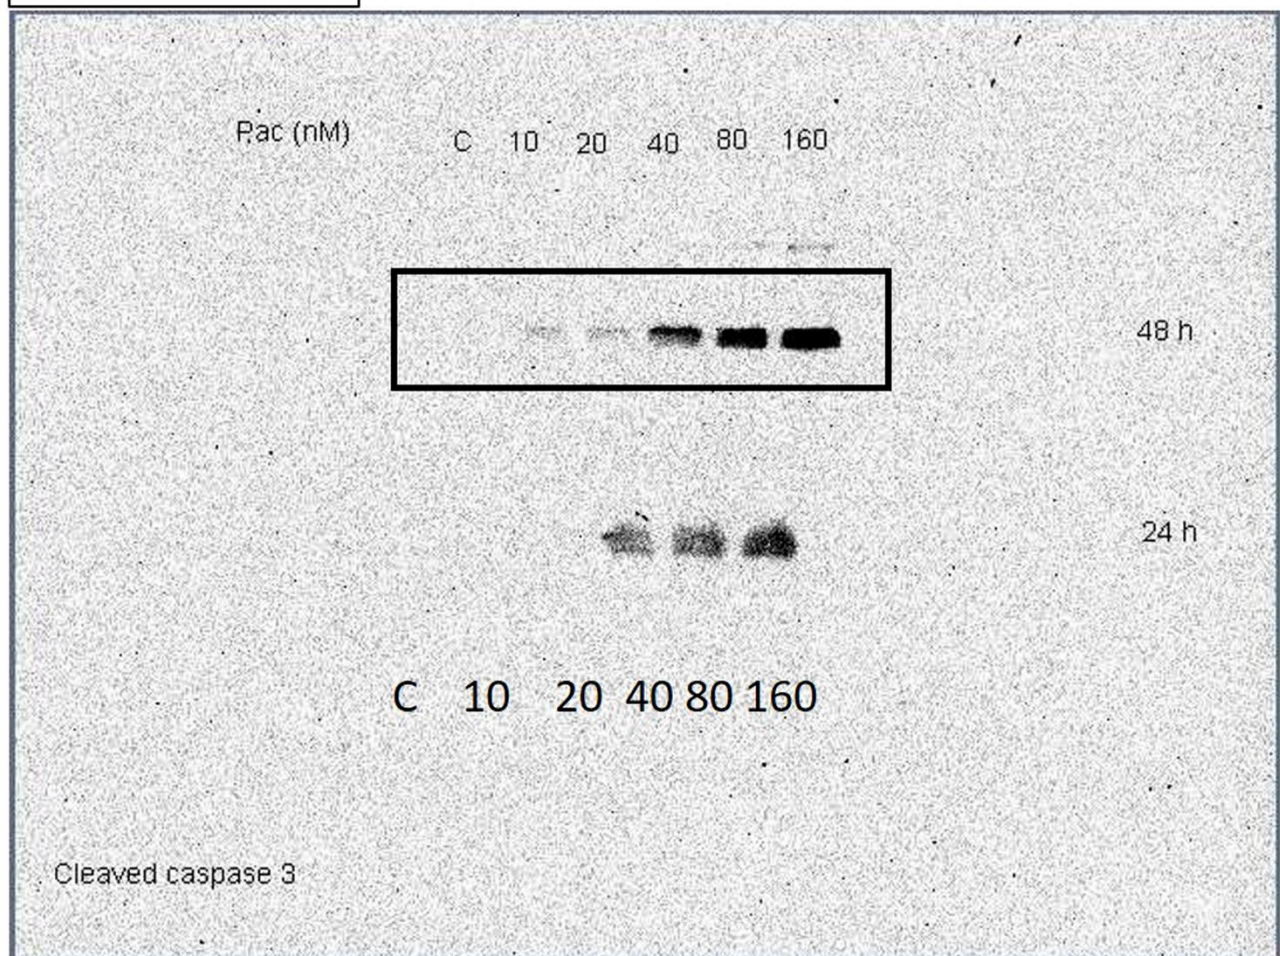

# Procaspase-3

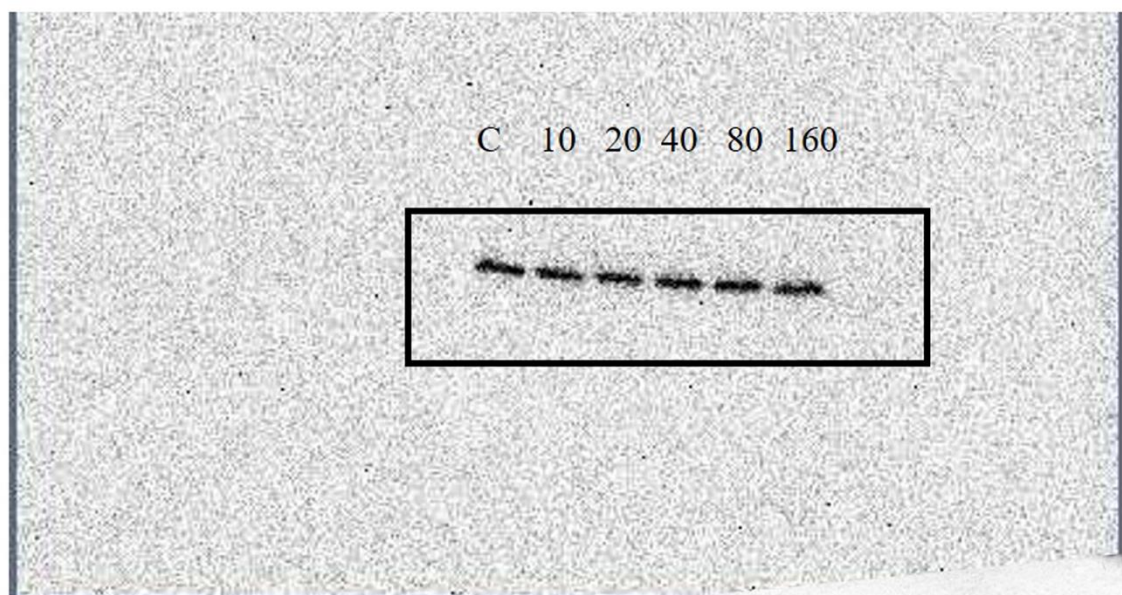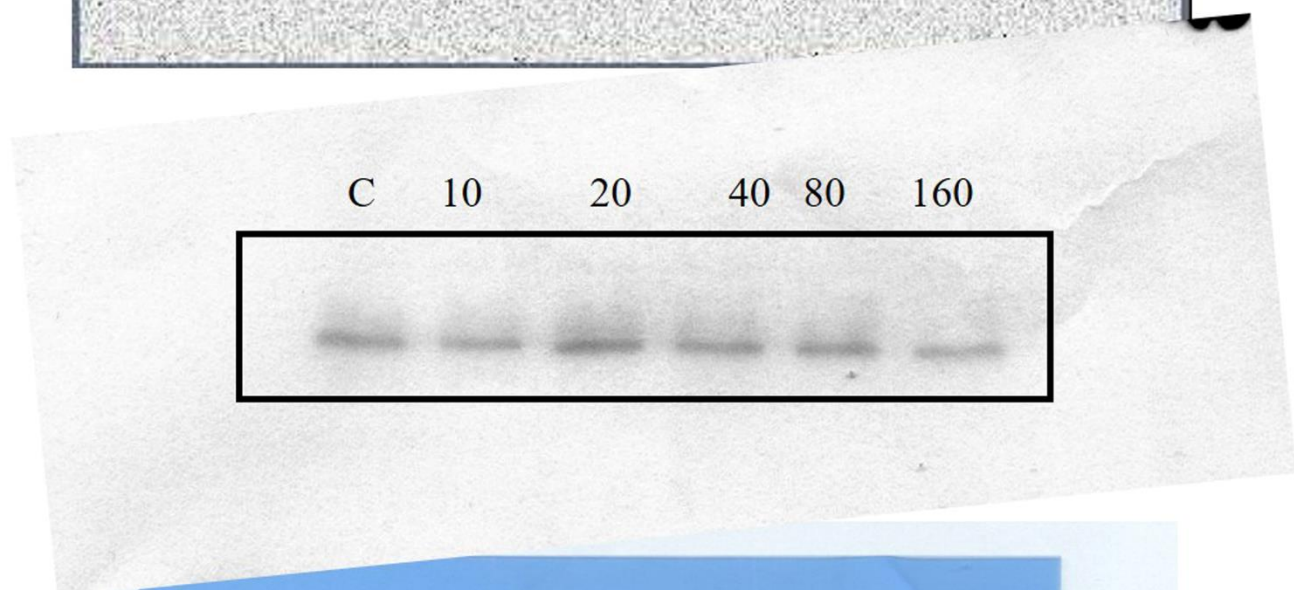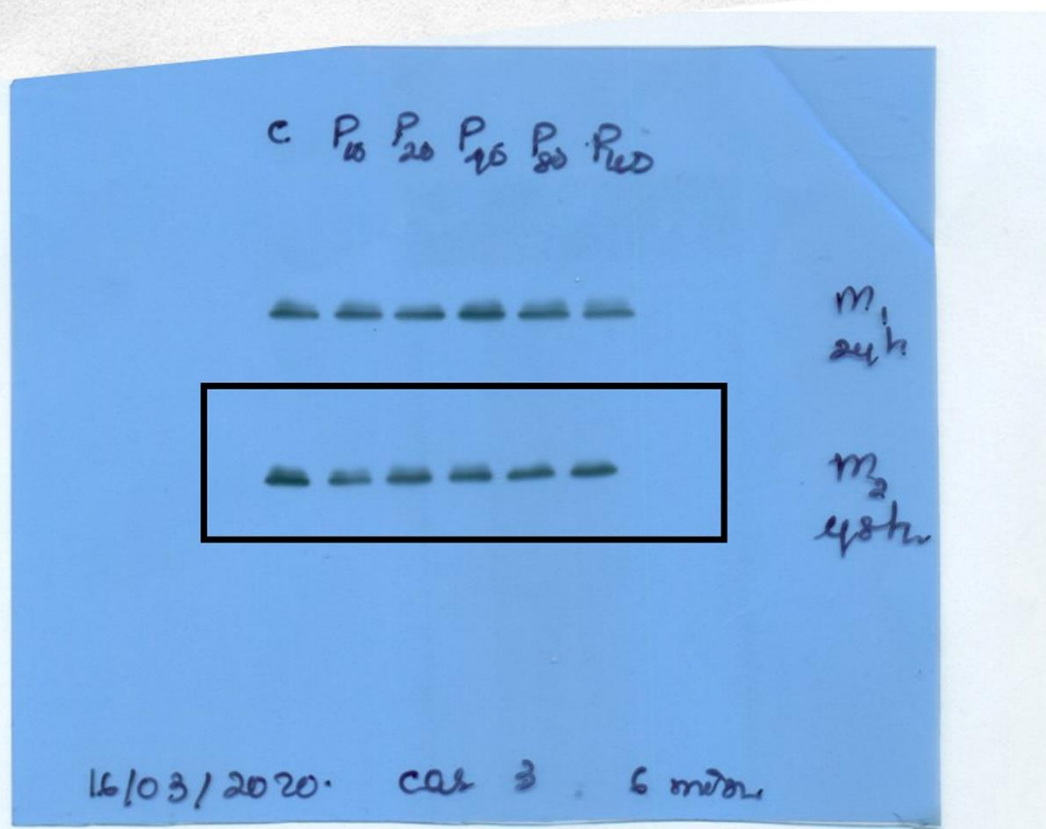

**PARP**

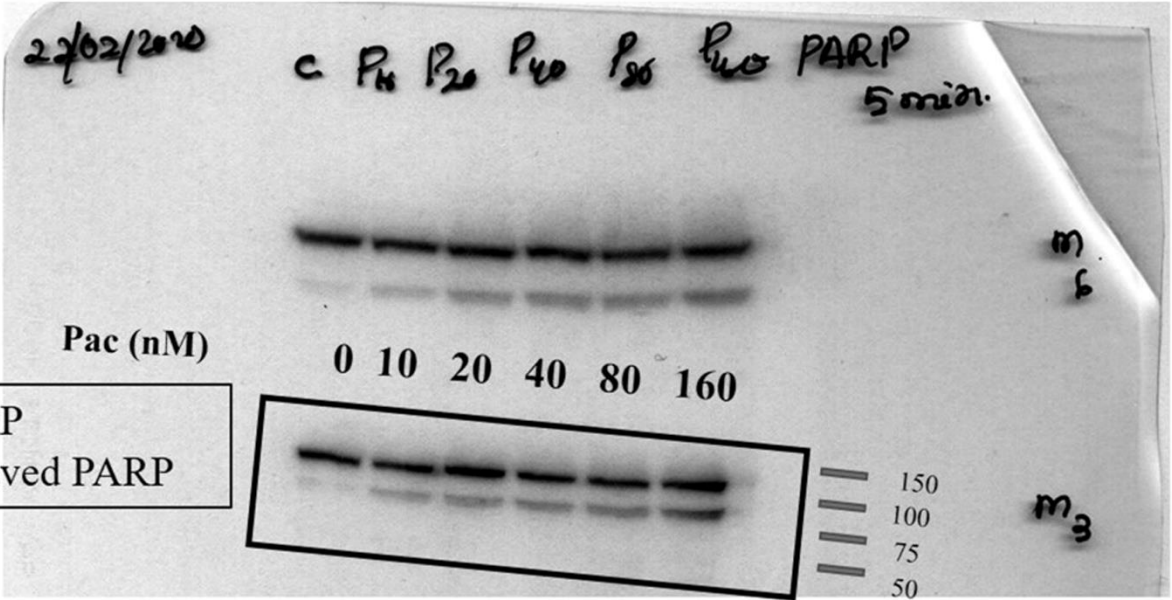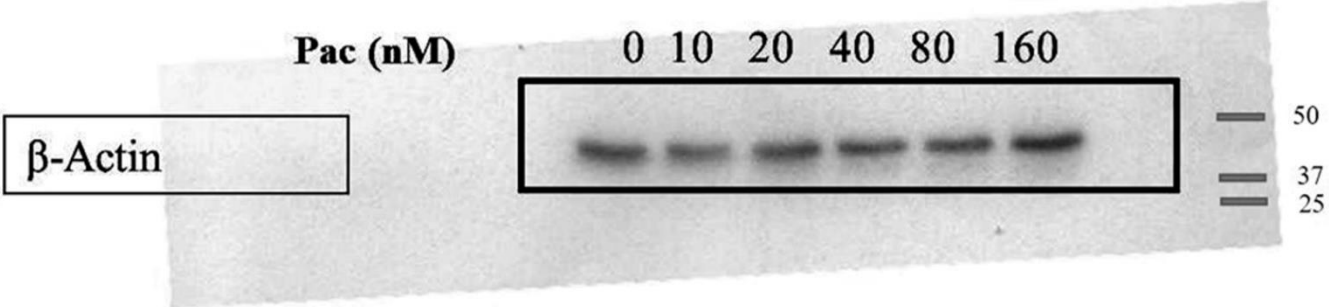

Figure. 2d

PARP

48 h

PARP  
Cleaved PARP

PARP  
Cleaved PARP

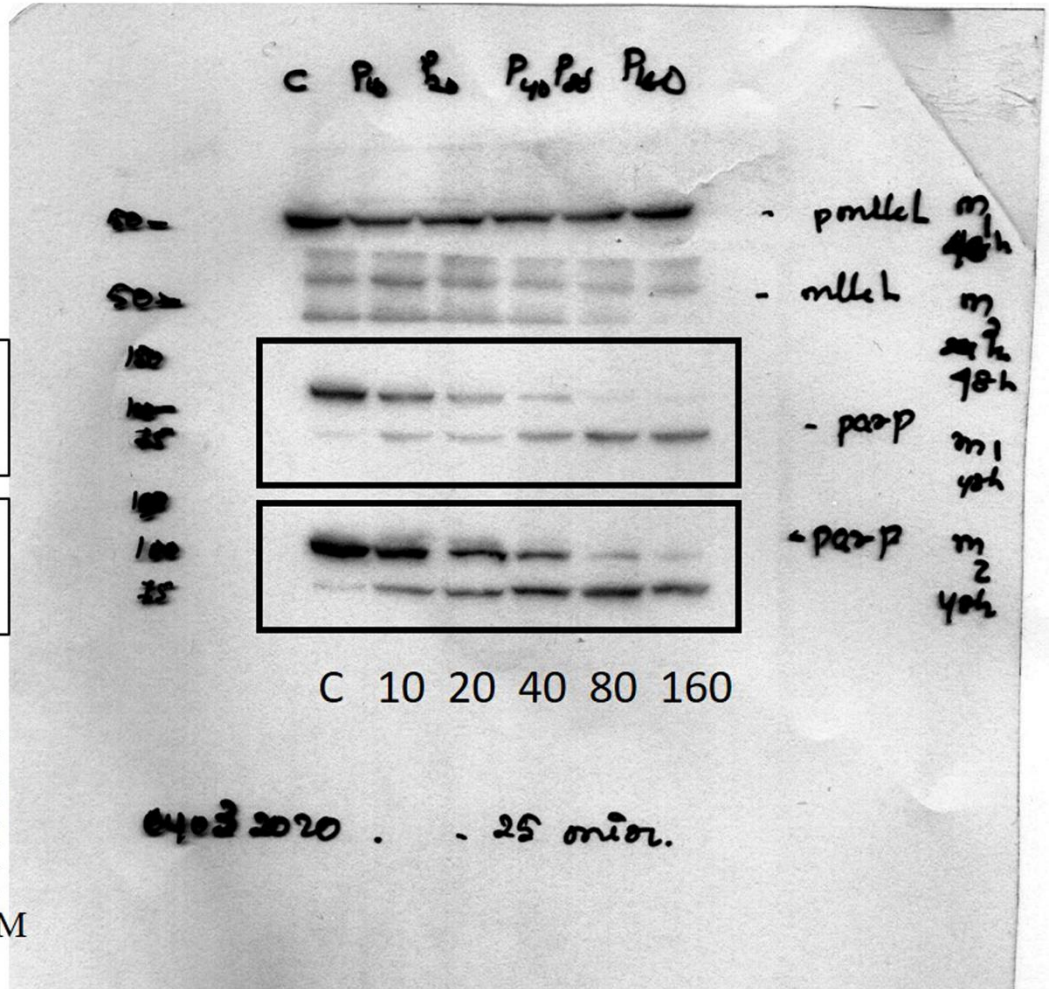

C= Control  
10= Paclitaxel 10nM  
20= Paclitaxel 20nM  
40= Paclitaxel 40nM  
80= Paclitaxel 80nM  
160=Paclitaxel 160nM

Figure. 2d

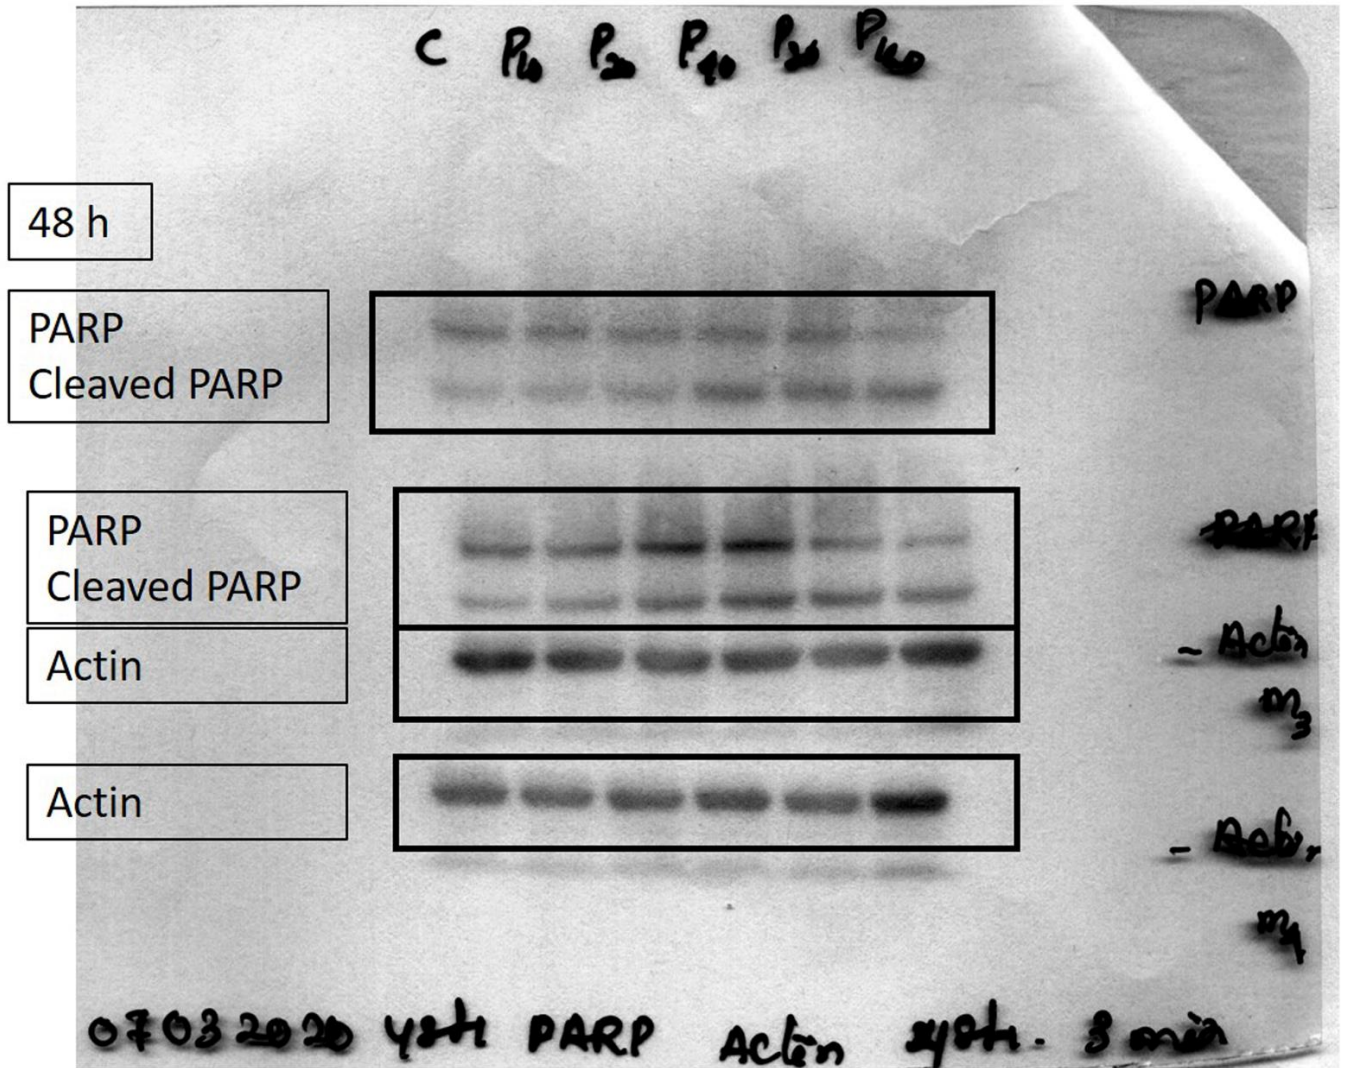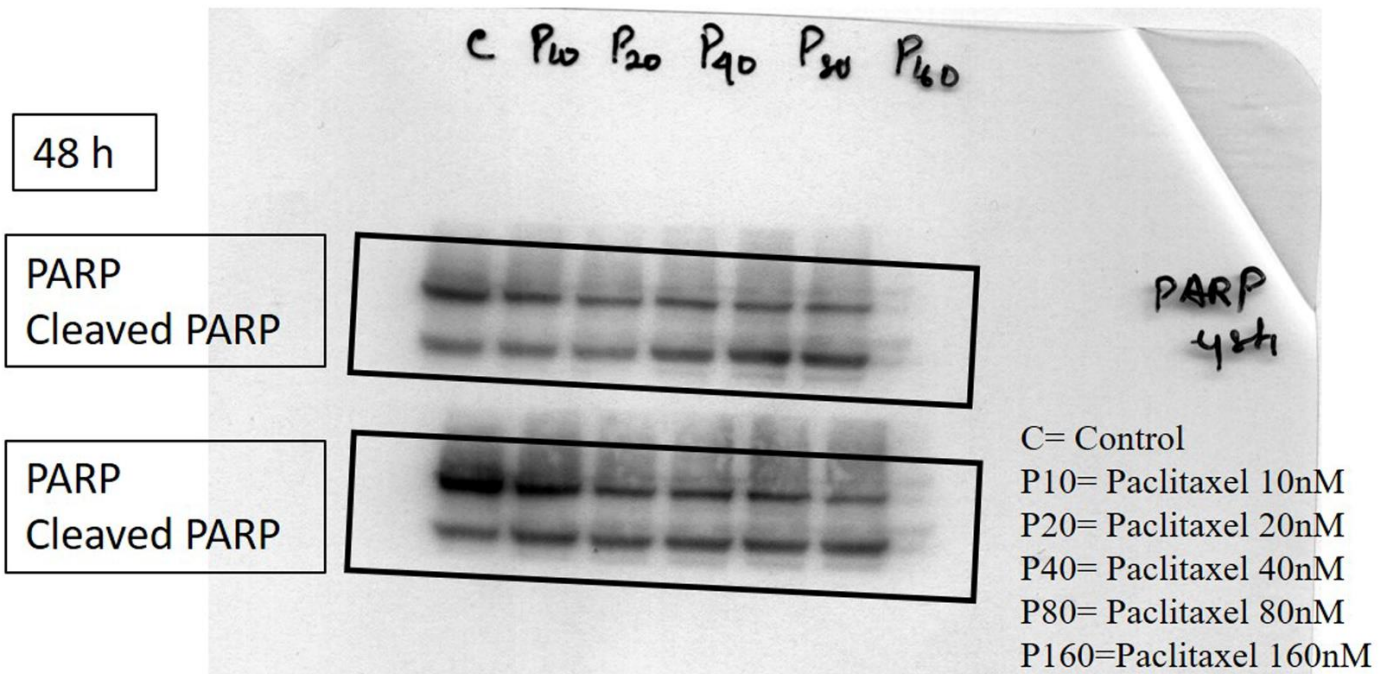

**Fig. 2e**

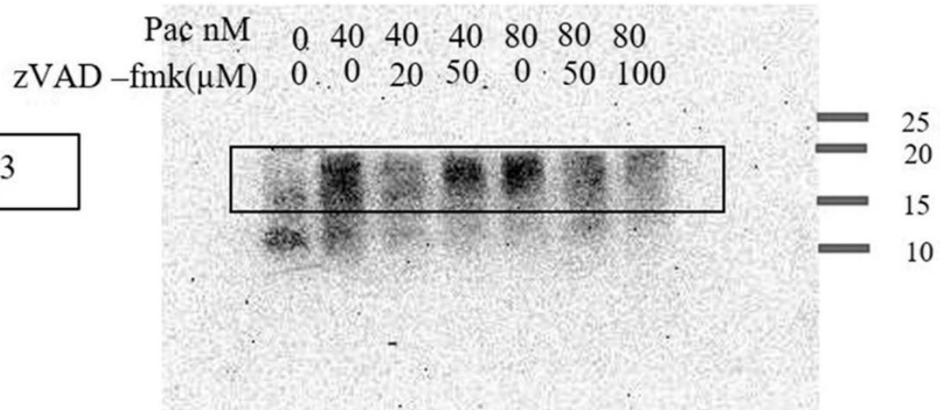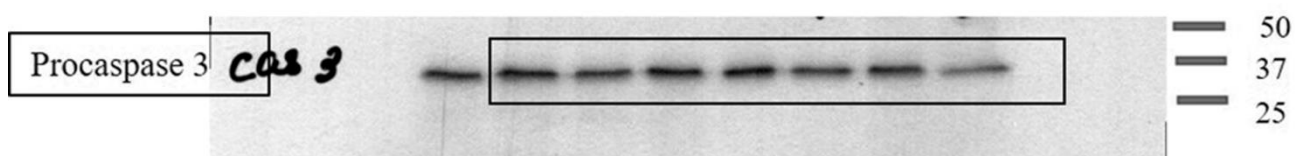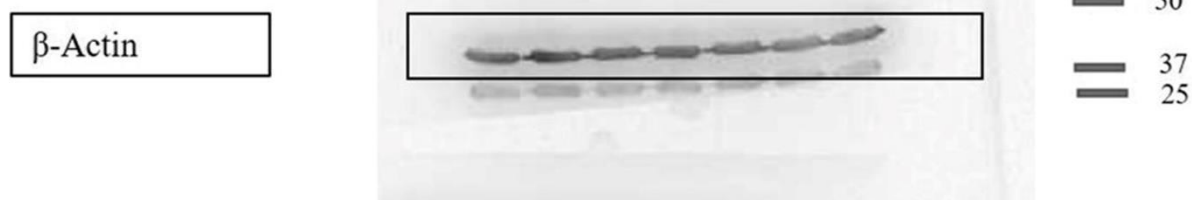

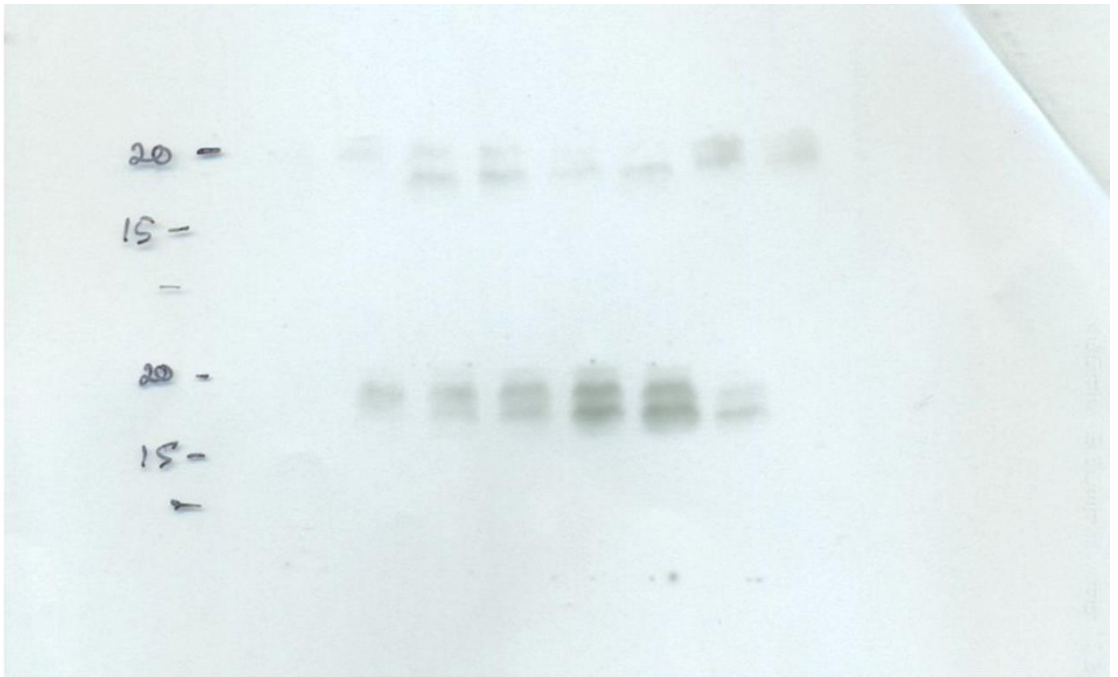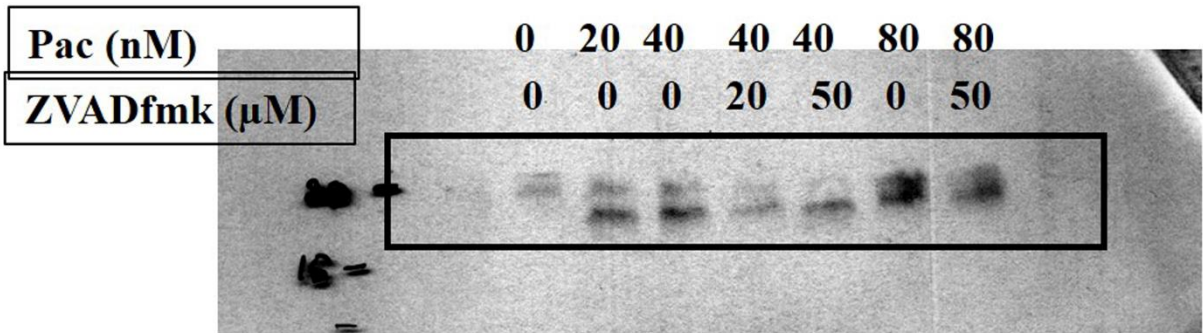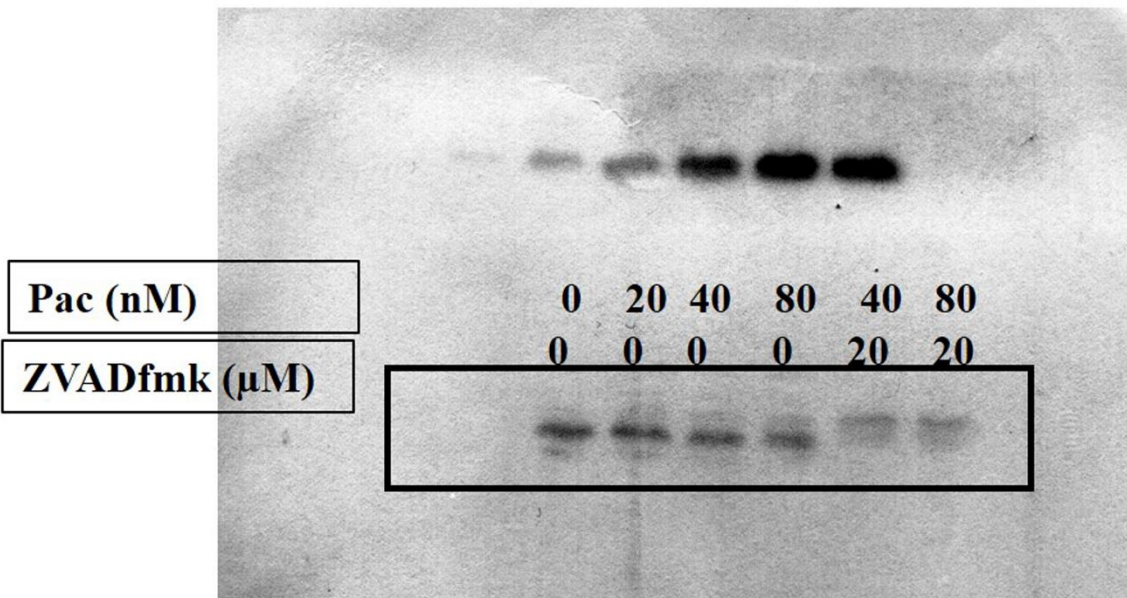

# Procaspase-3

Pac (nM)

ZVADfmk ( $\mu$ M)

|   |    |    |    |    |    |    |
|---|----|----|----|----|----|----|
| 0 | 20 | 40 | 40 | 40 | 80 | 80 |
| 0 | 0  | 0  | 20 | 50 | 0  | 50 |

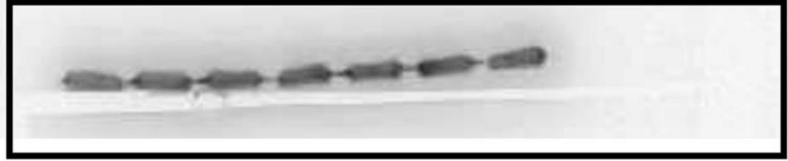

Pac (nM)

ZVADfmk ( $\mu$ M)

|   |    |    |    |    |    |
|---|----|----|----|----|----|
| 0 | 20 | 40 | 80 | 40 | 80 |
| 0 | 0  | 0  | 0  | 20 | 20 |

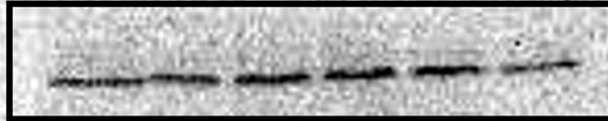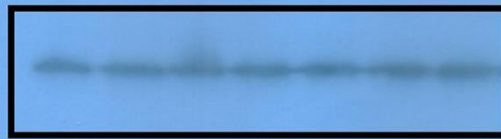

Cas-3 27/03/2020 34 h. 3 min  
NoS



# Supporting data

**Fig. BB** Photographs of the replicated full-length blots described in Figure 3

**Fig. 3b**

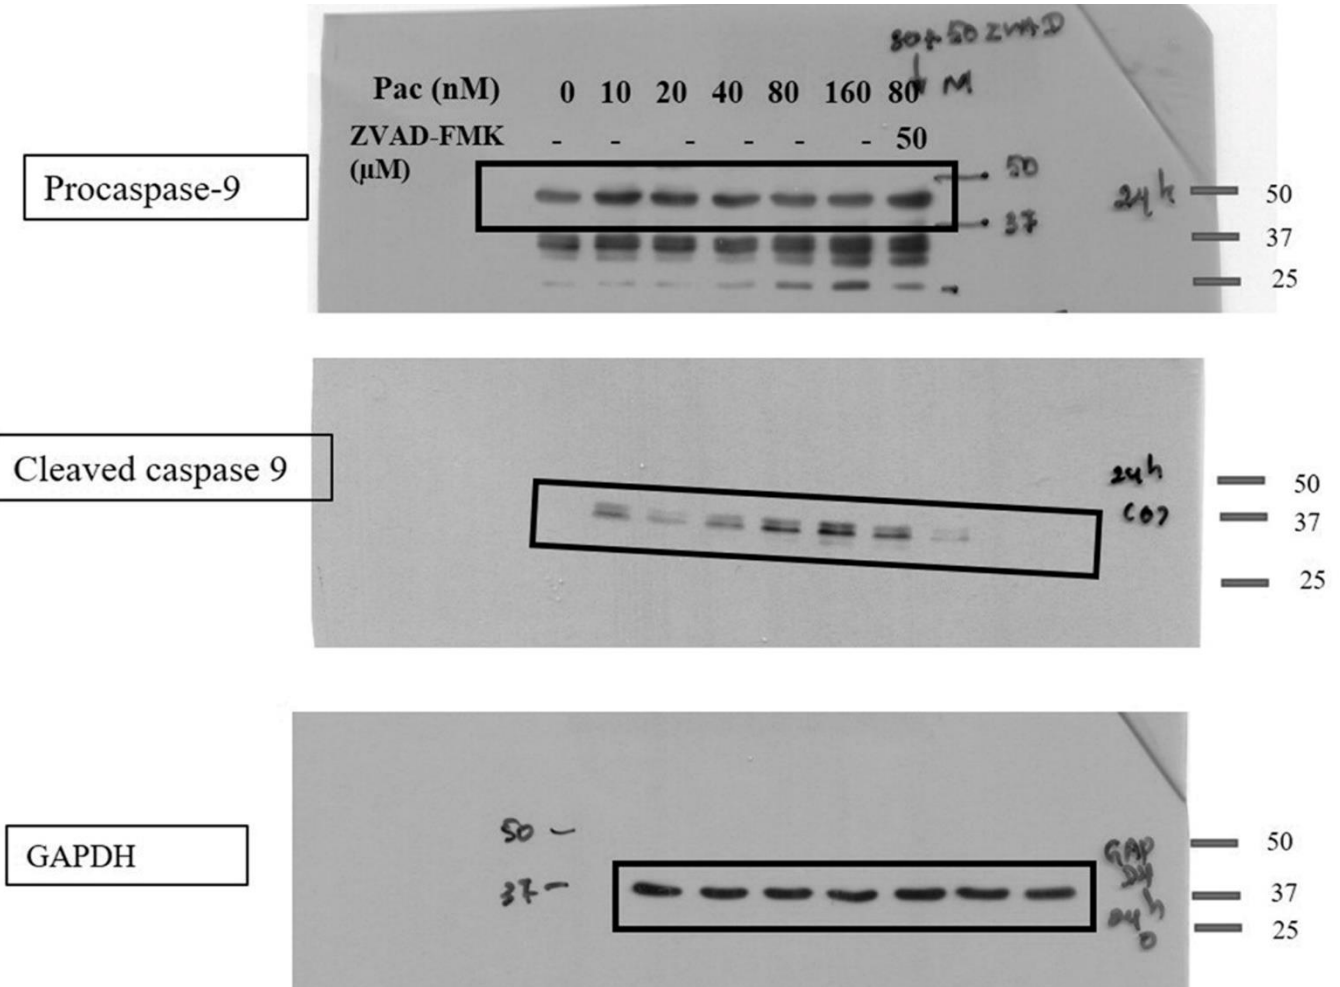

# Cleaved cas 9

24 h

Cleaved caspase 9

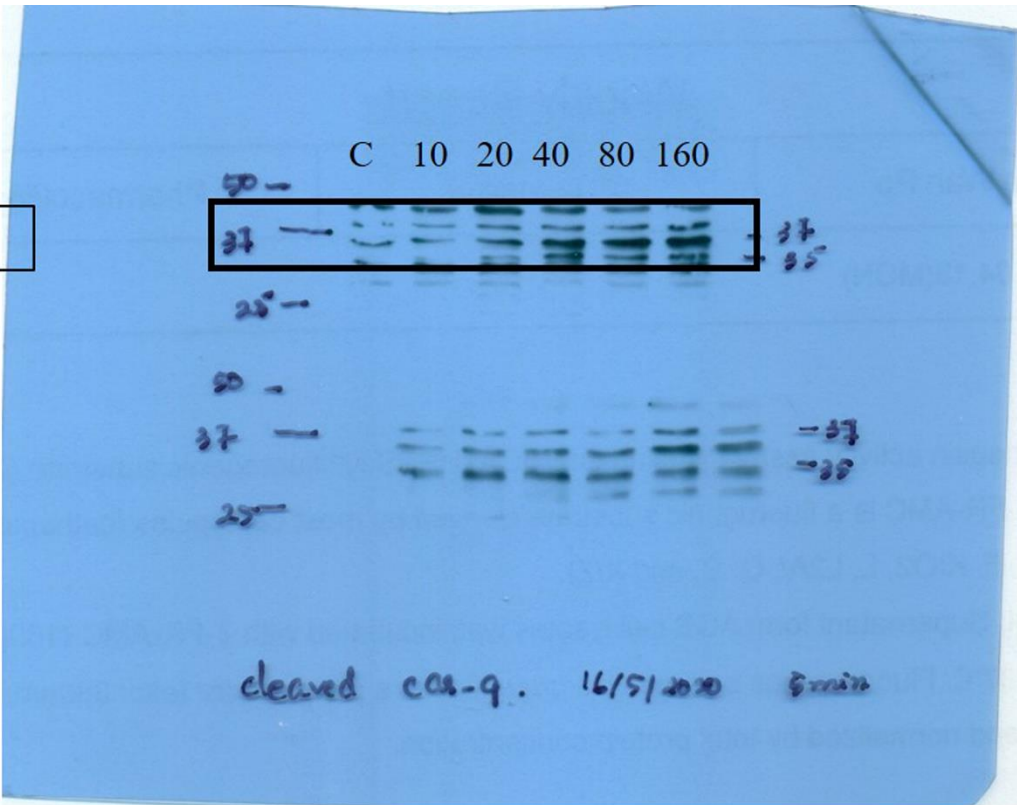

24 h

Cleaved caspase 9

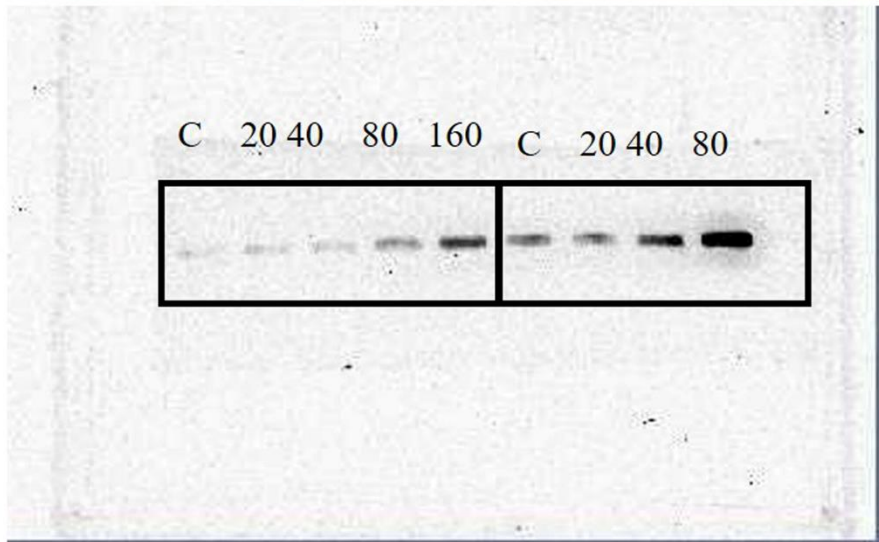

**Fig. 3c**

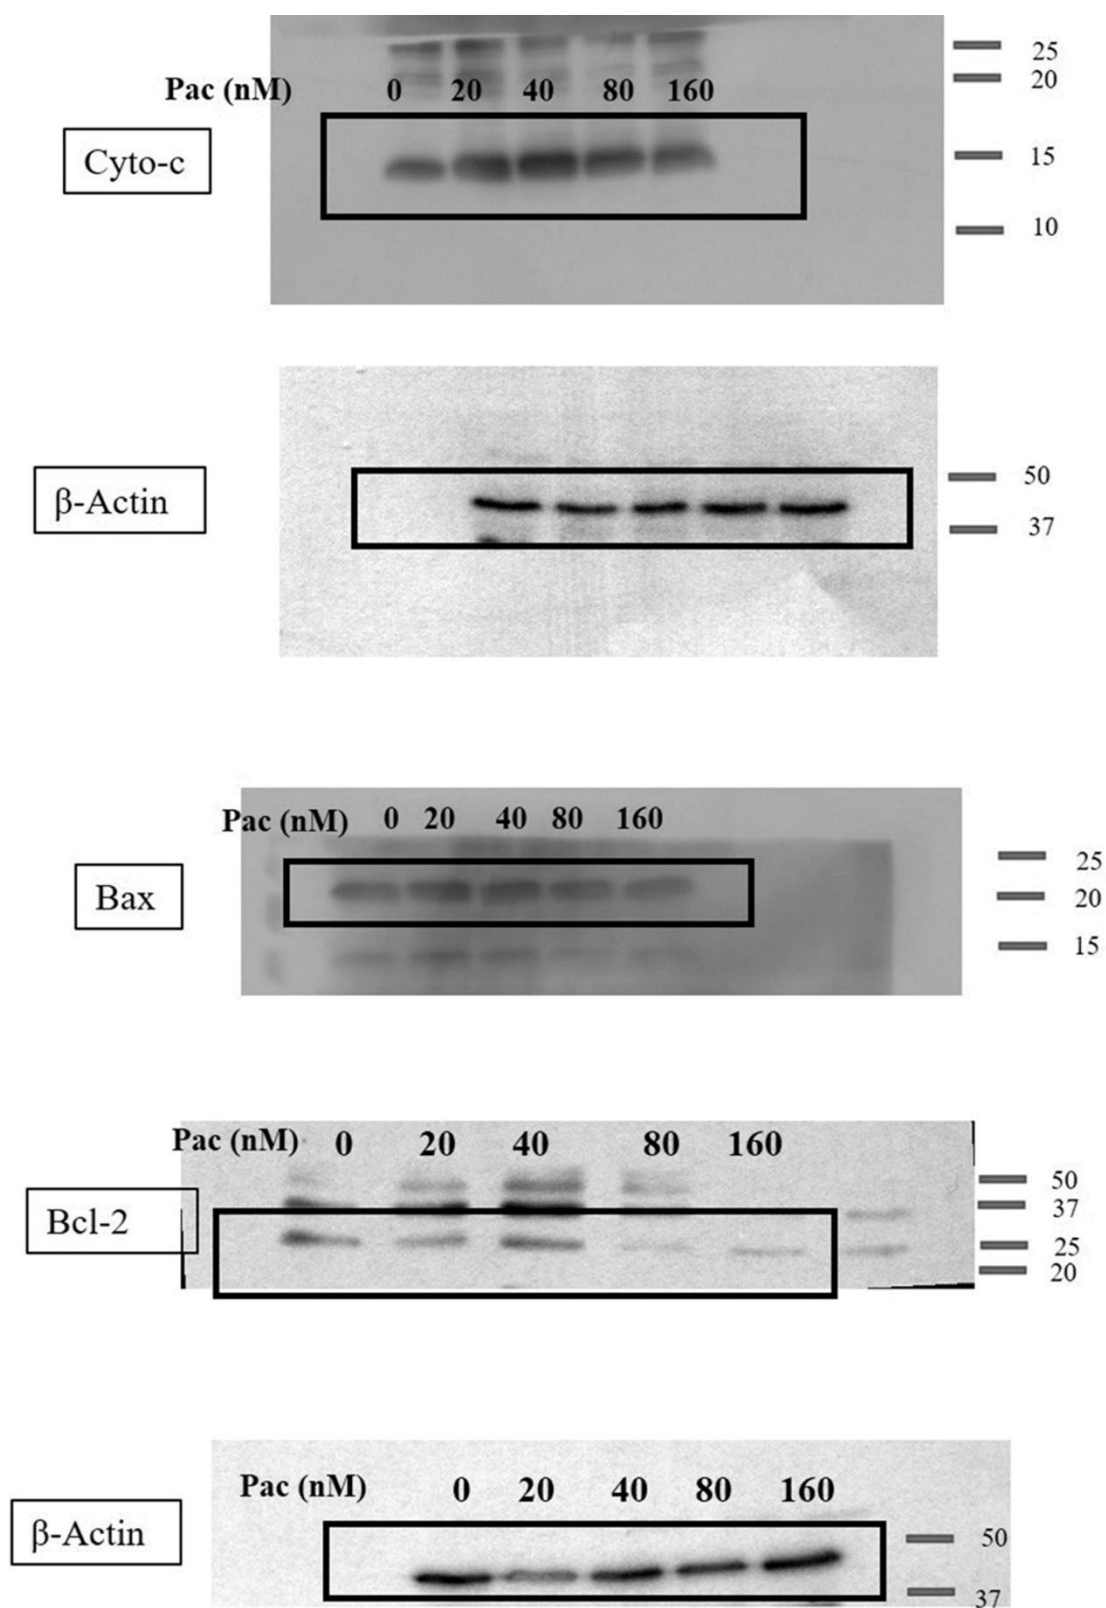

Cytochrome c

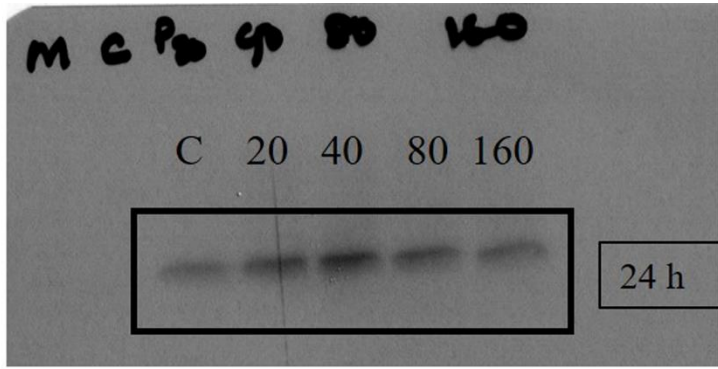

Cytochrome c

24 h

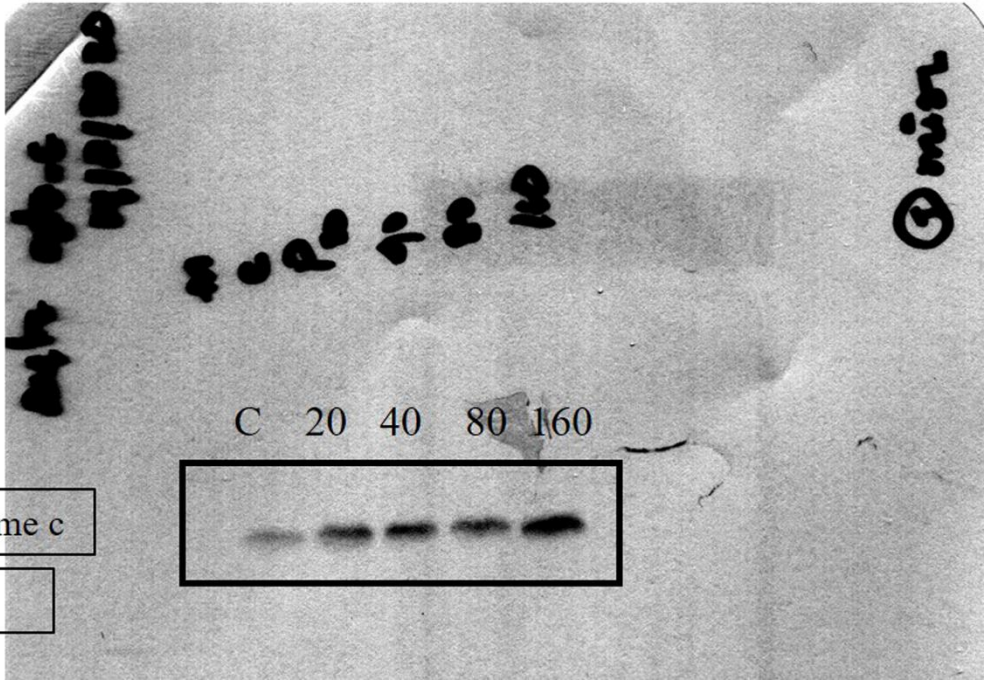

Bax

24 h

Bax

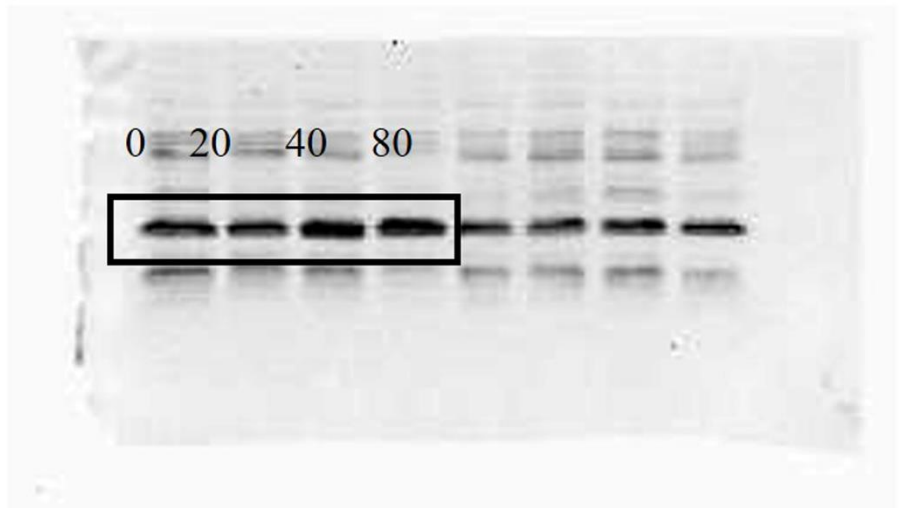

24 h

Bax

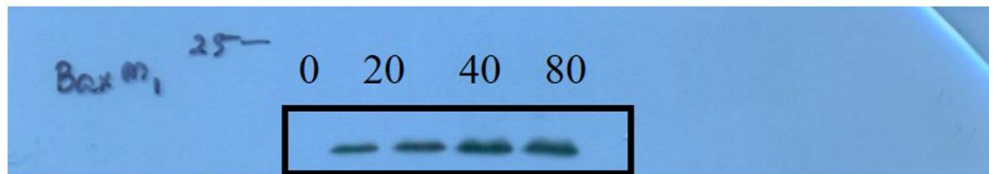

24 h

Bax

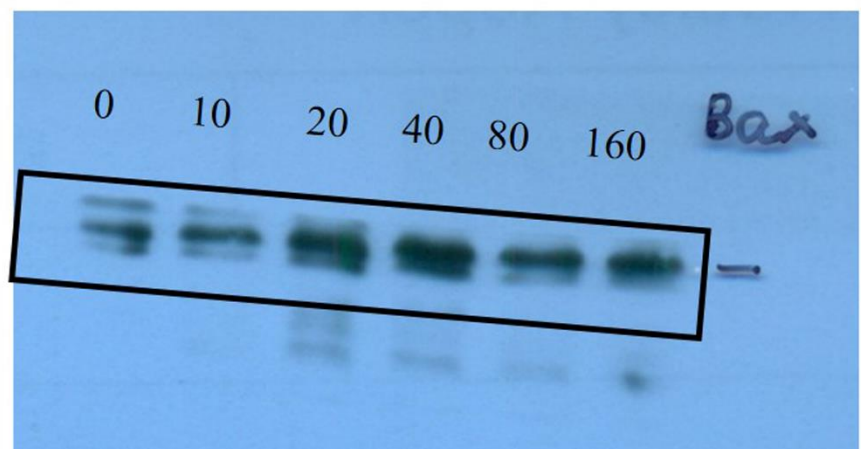

Bax

24 h

Bax

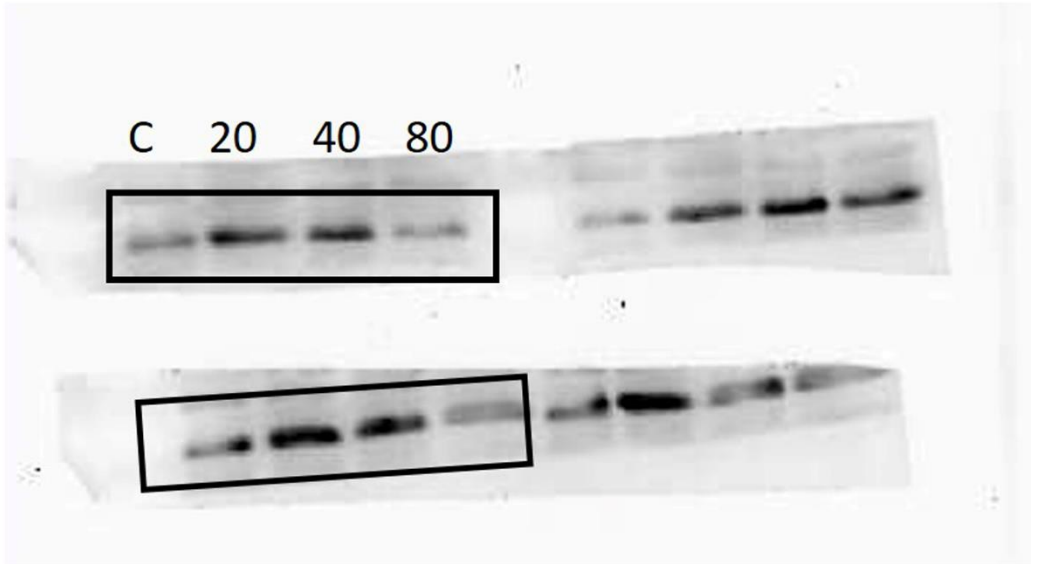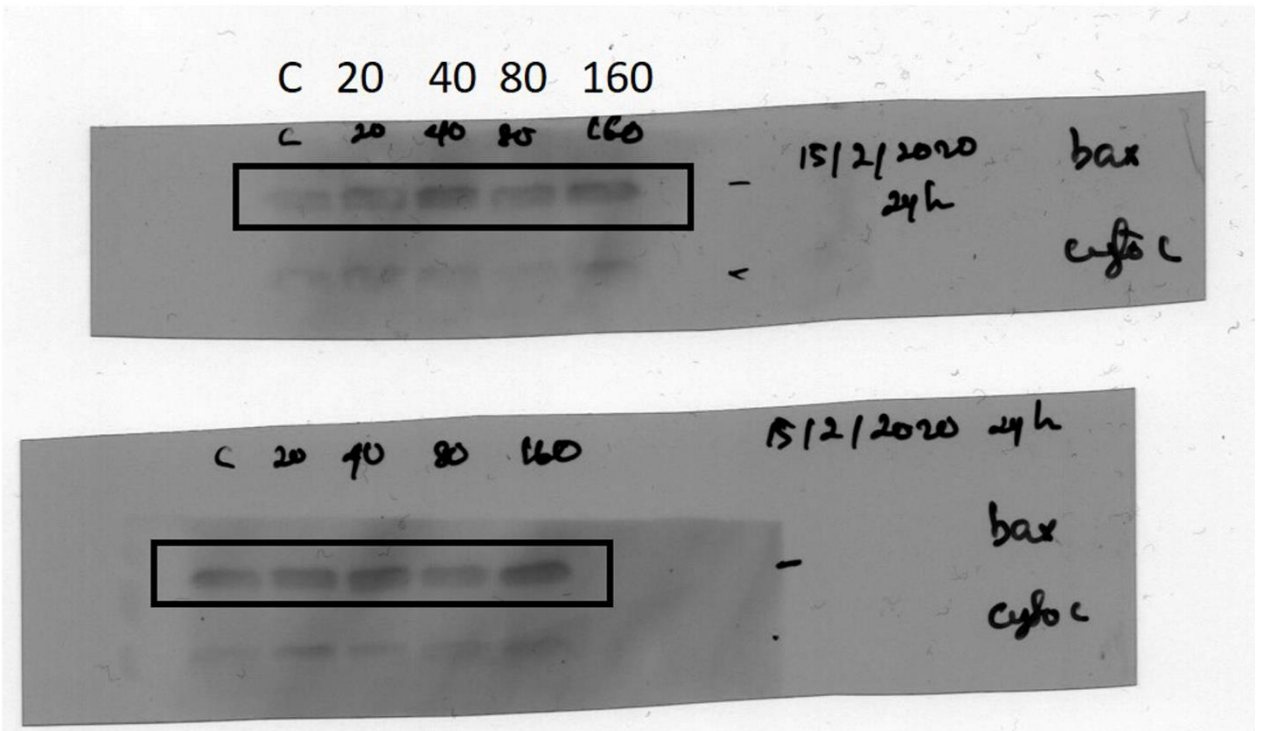

Bcl-2

24 h

Bcl-2

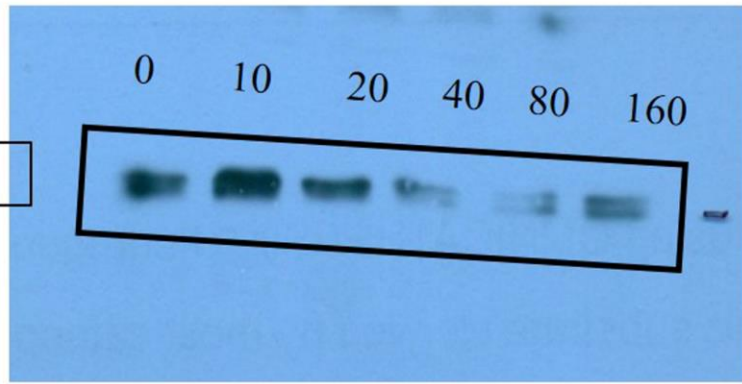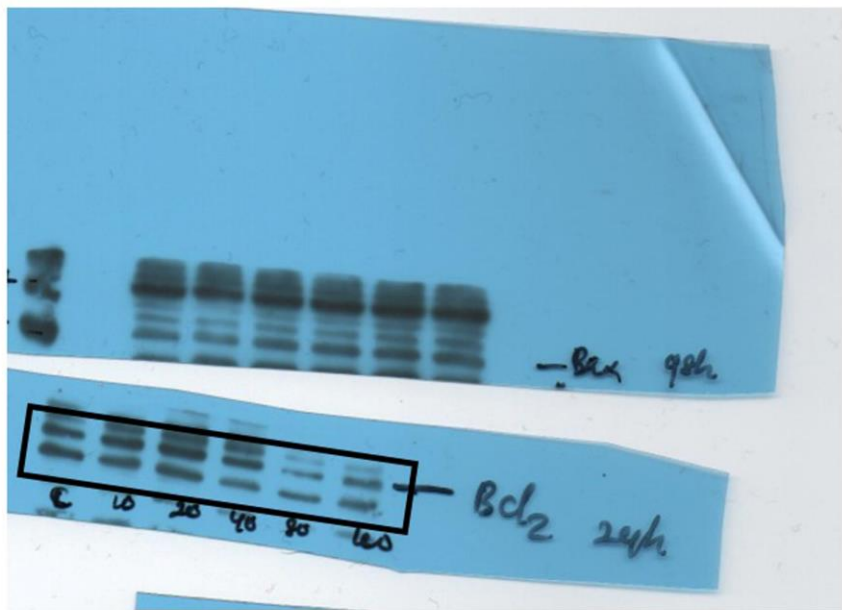

Bcl-2

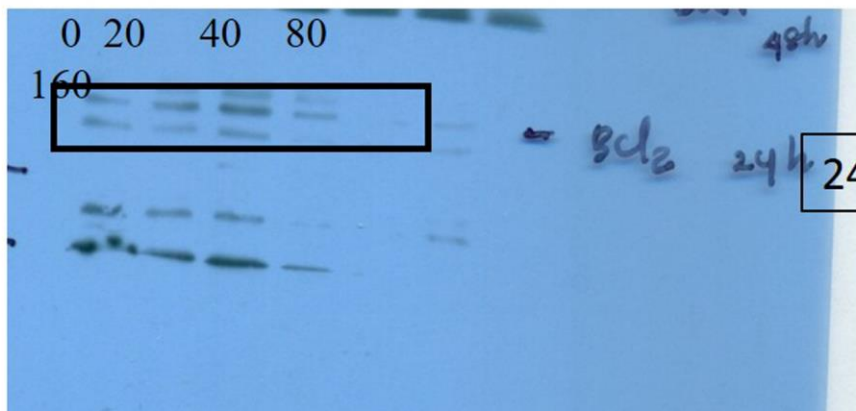

24 h

Bcl-2  
24 h

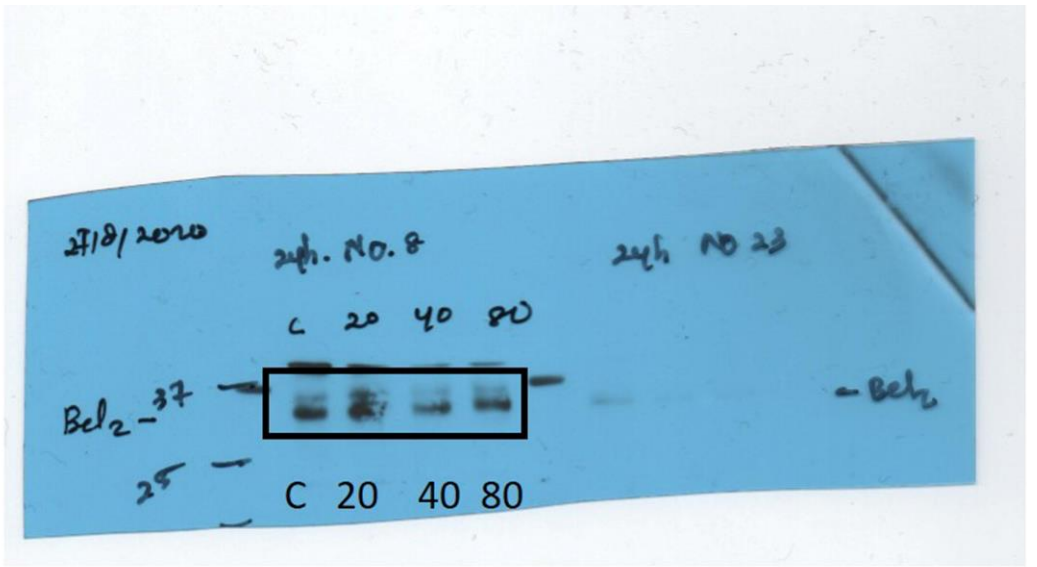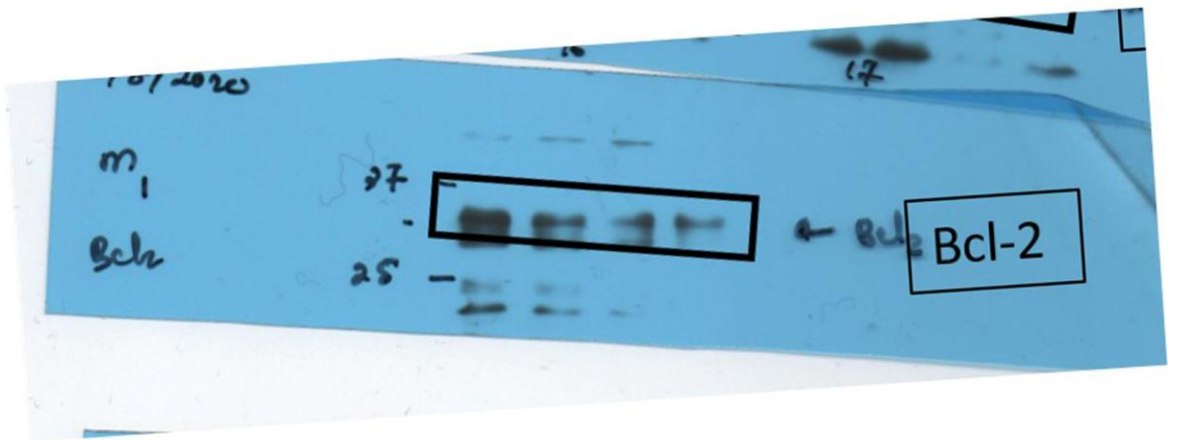



**Fig.3d**

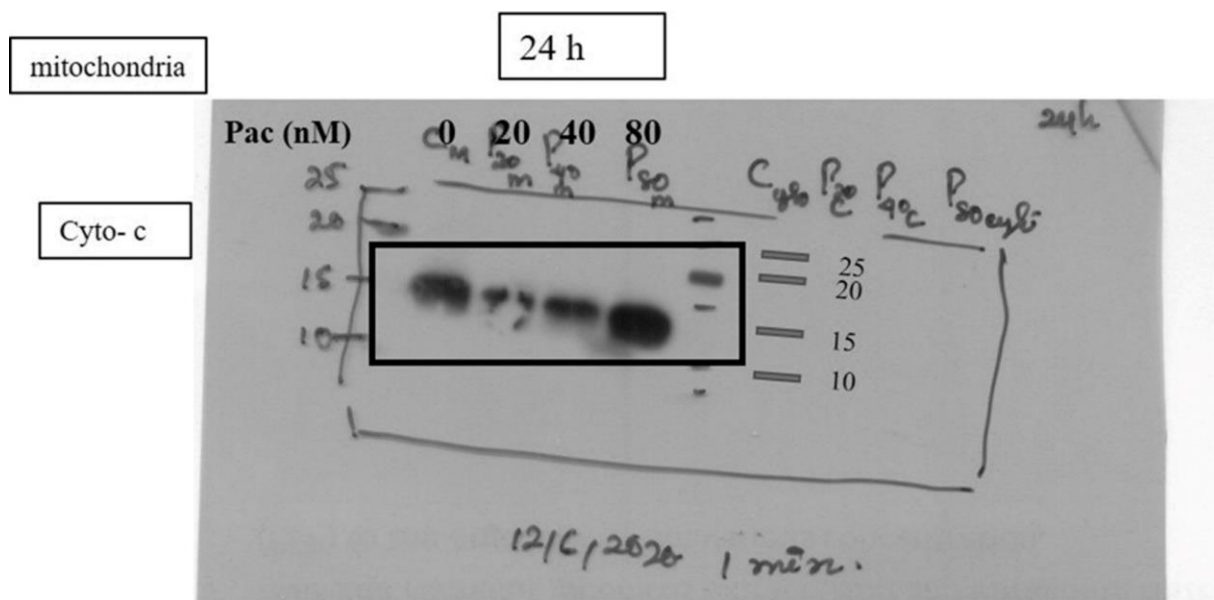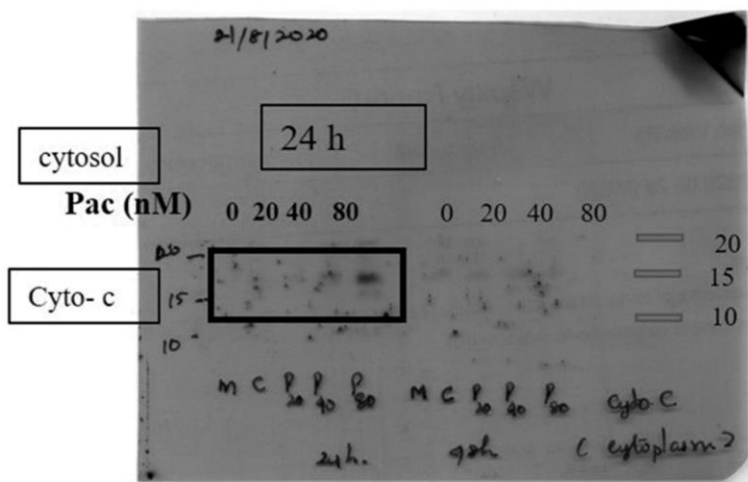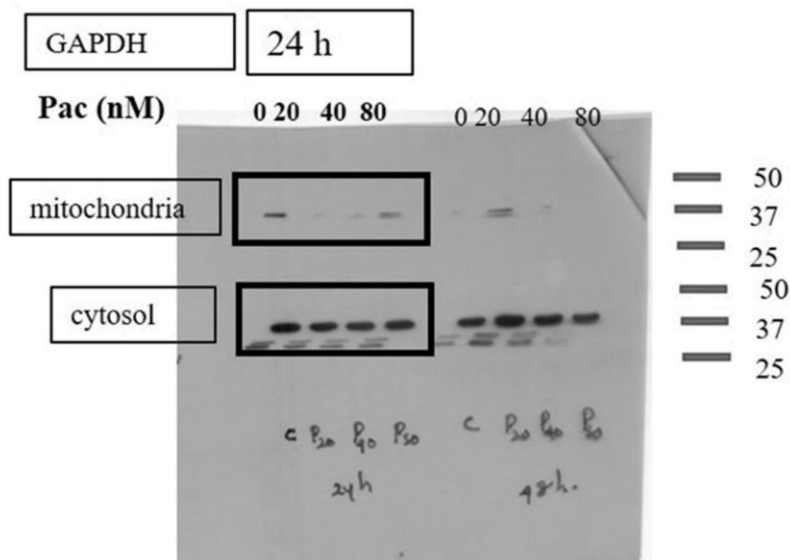

**Fig. 3f**

Cleaved caspase 9

Pac (nM) 0 10 20 40 80 160

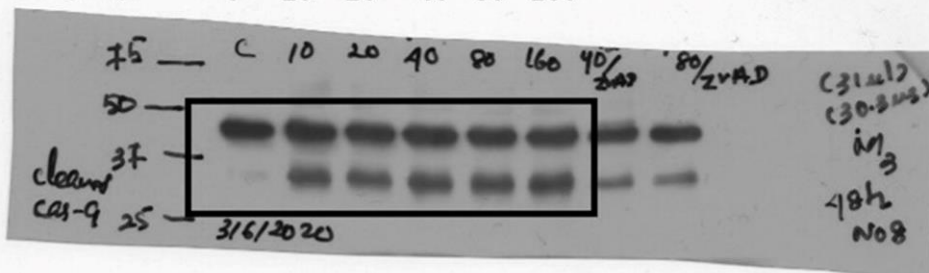

Procaspase-9  
Cleaved caspase 9

Pac (nM) 0 10 20 40 80 160

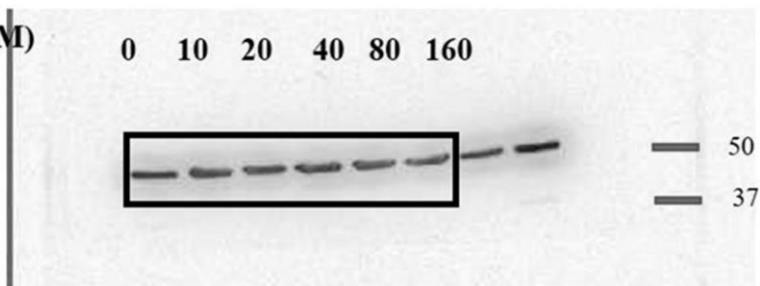

$\beta$ -Actin

# Cleaved caspase 9

48 h

Procaspase-9  
Cleaved caspase 9

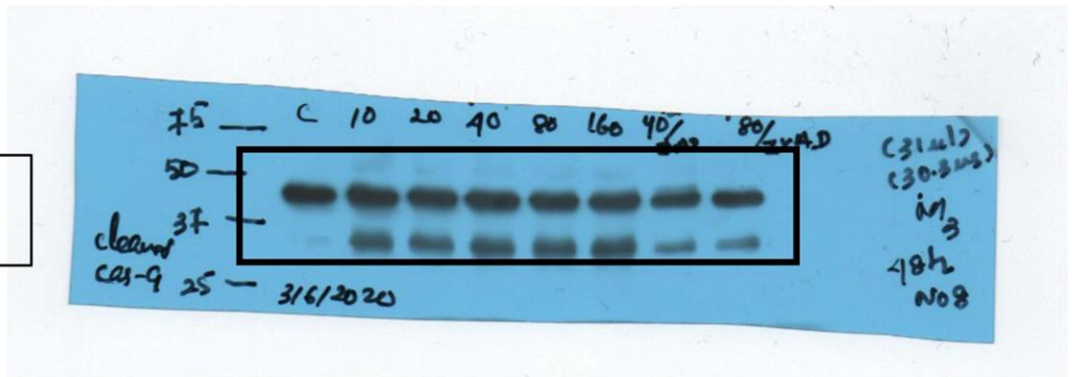

48 h

Cleaved caspase 9

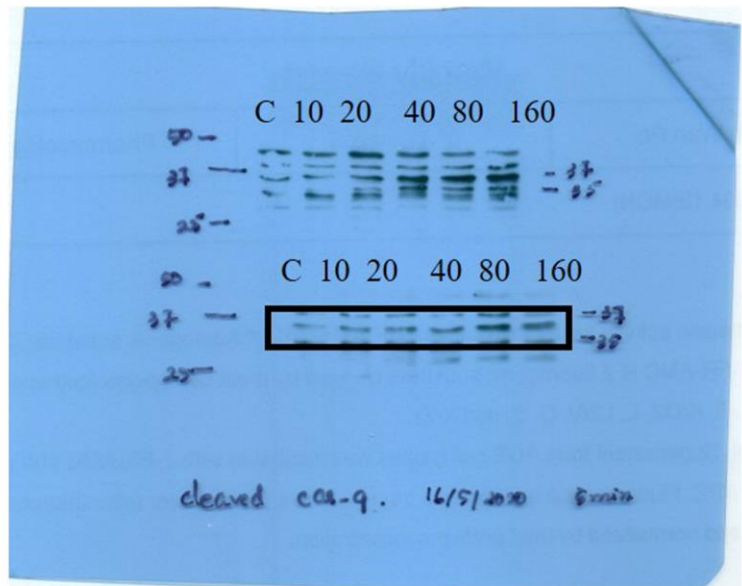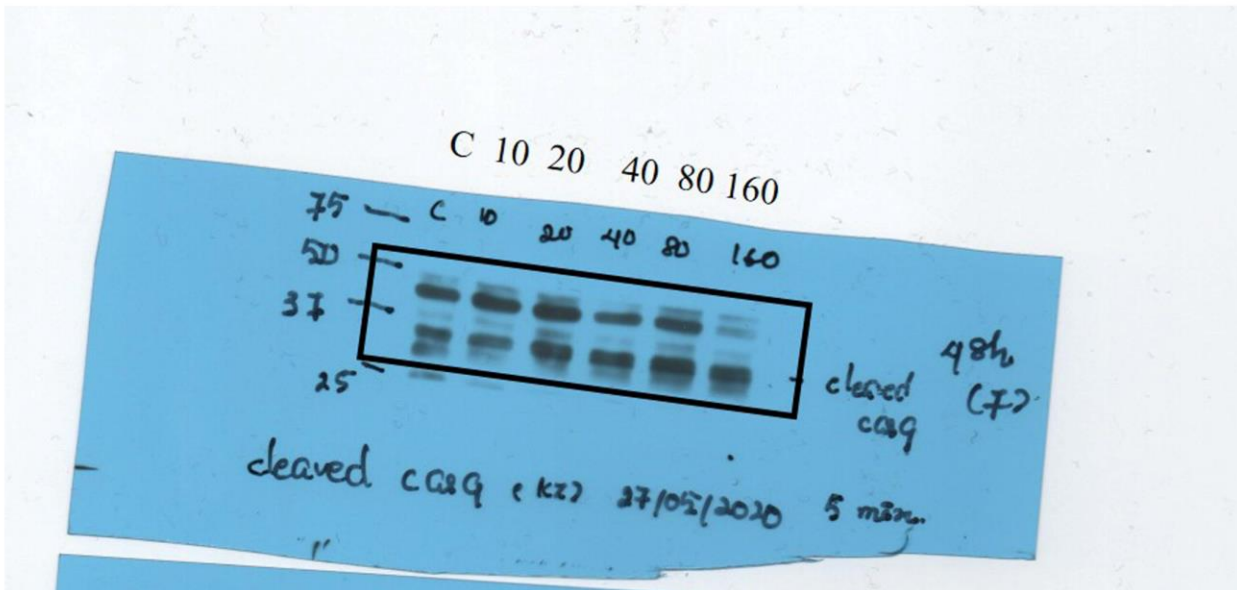

**Fig. 3g**

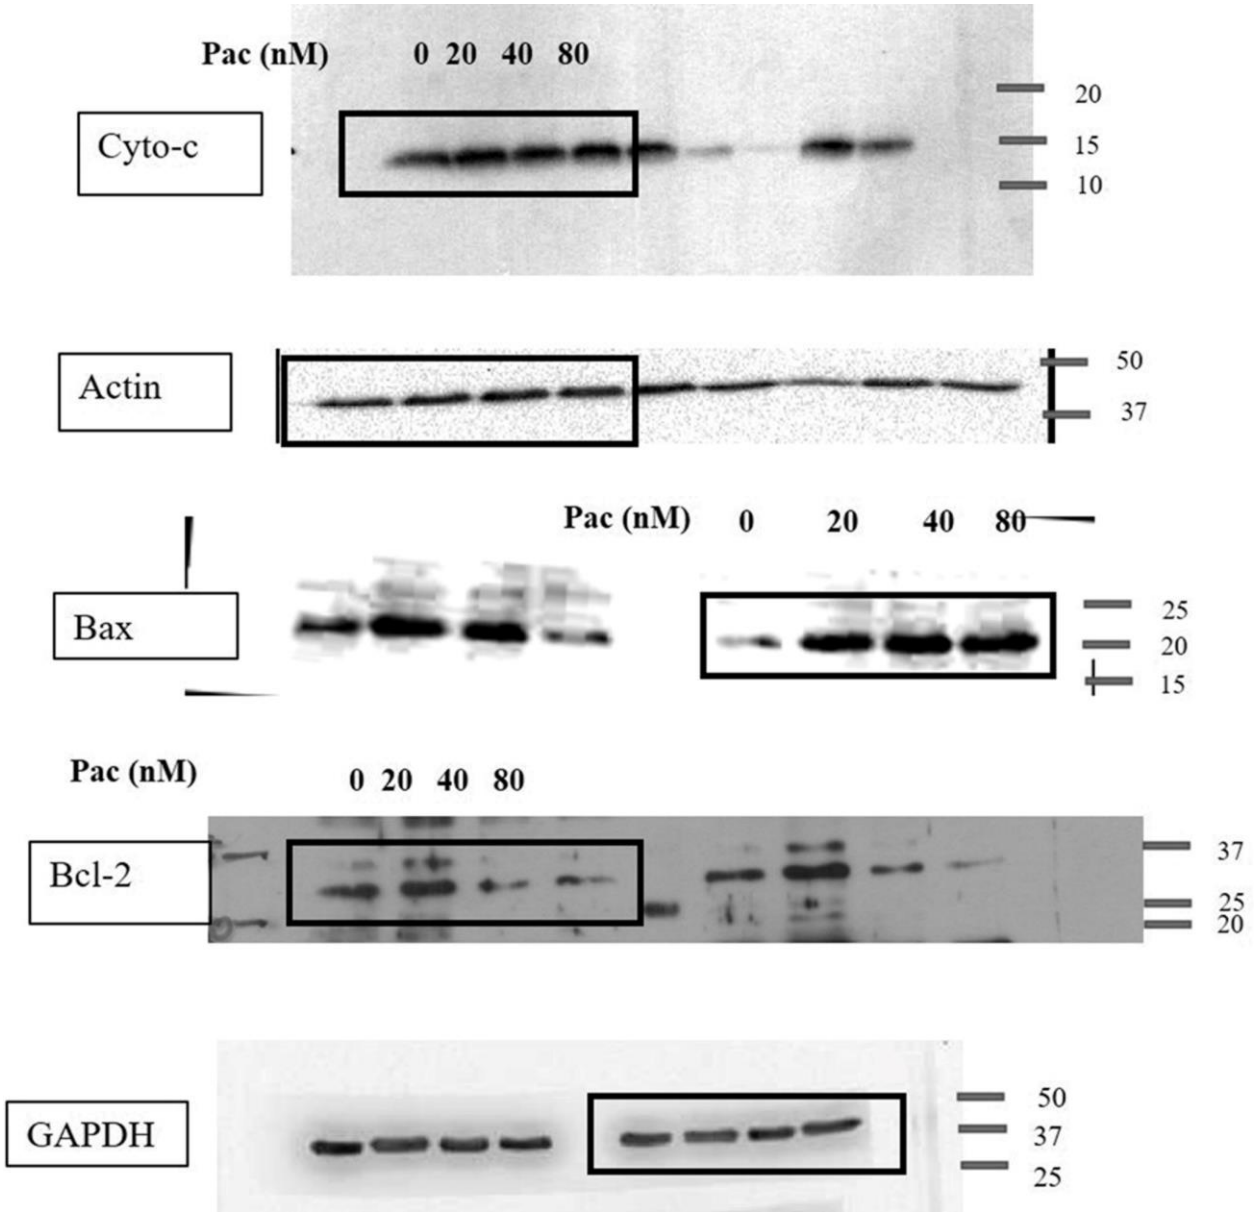

# Cytochrome c

Cytochrome c

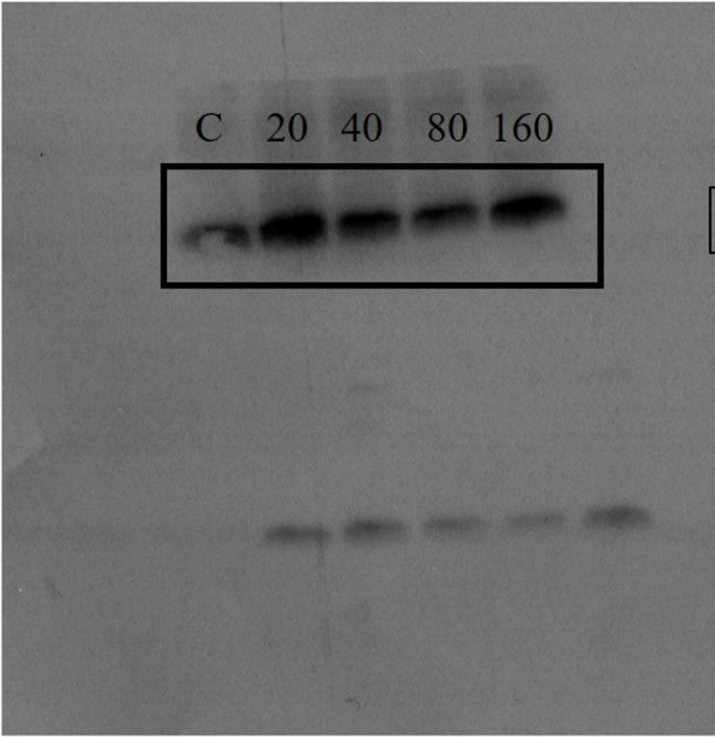

48 h

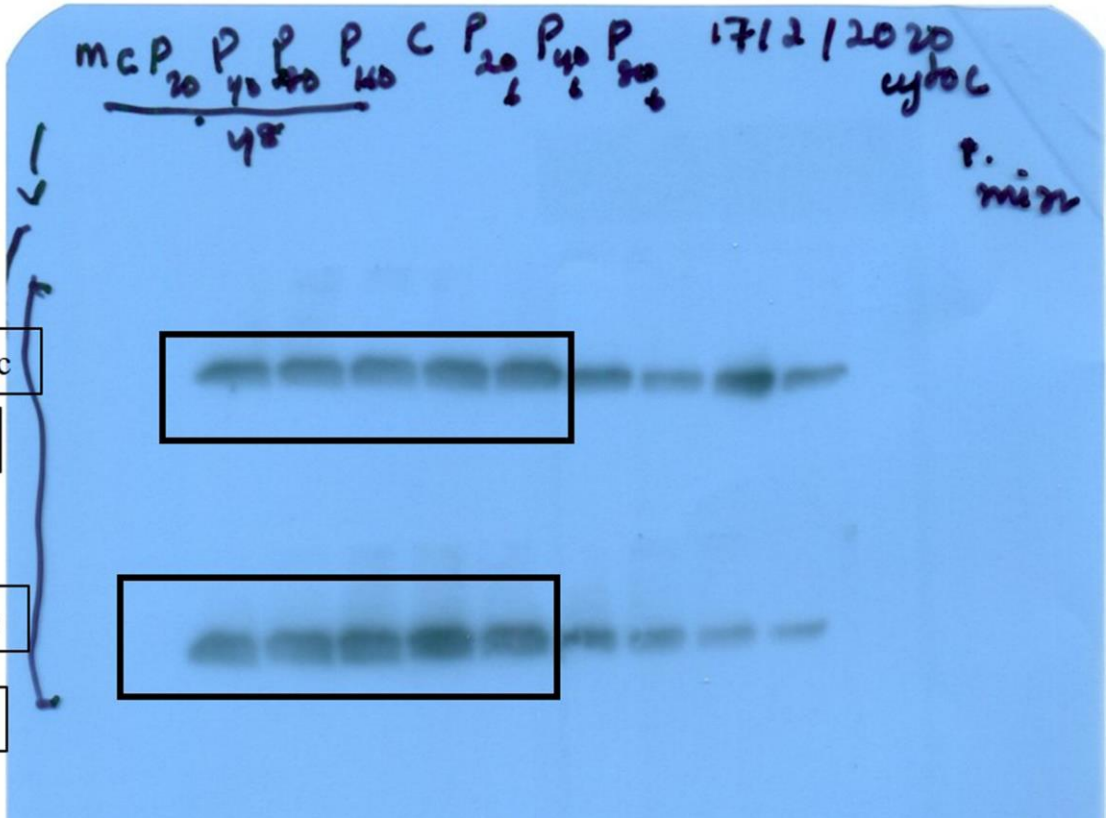

Cytochrome c

48 h

Cytochrome c

48 h

Bax

48 h  
Bax

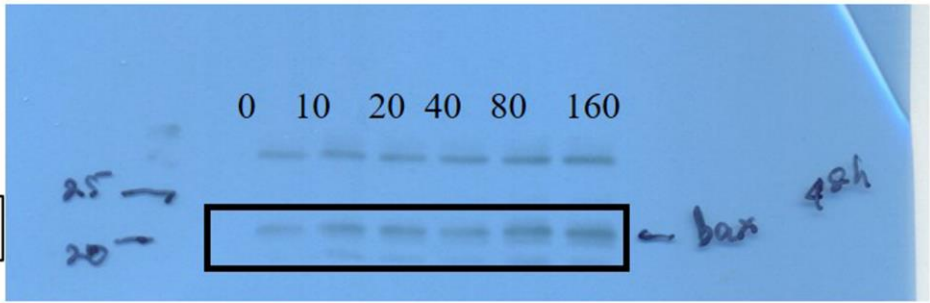

Bax

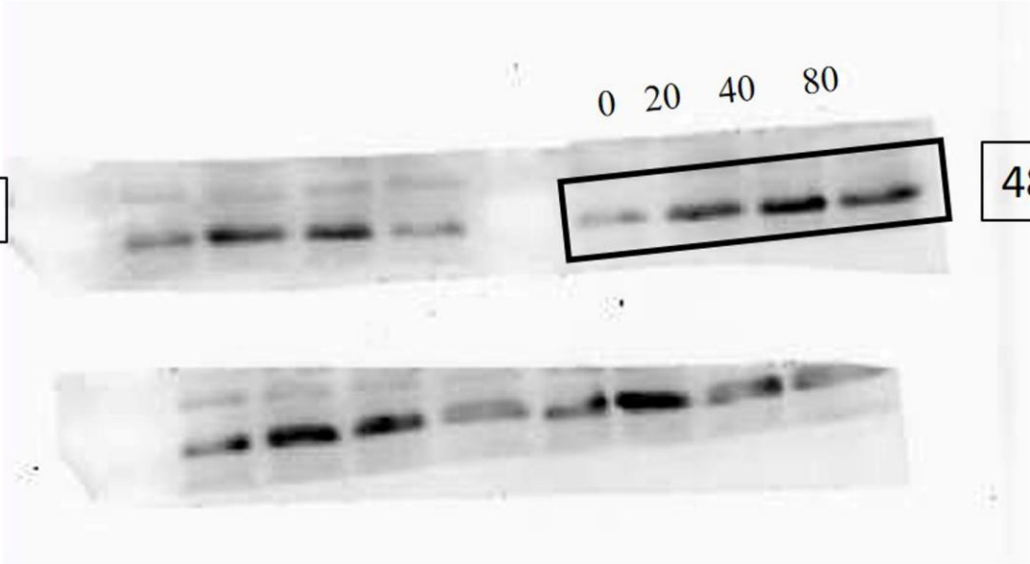

48 h  
Bax

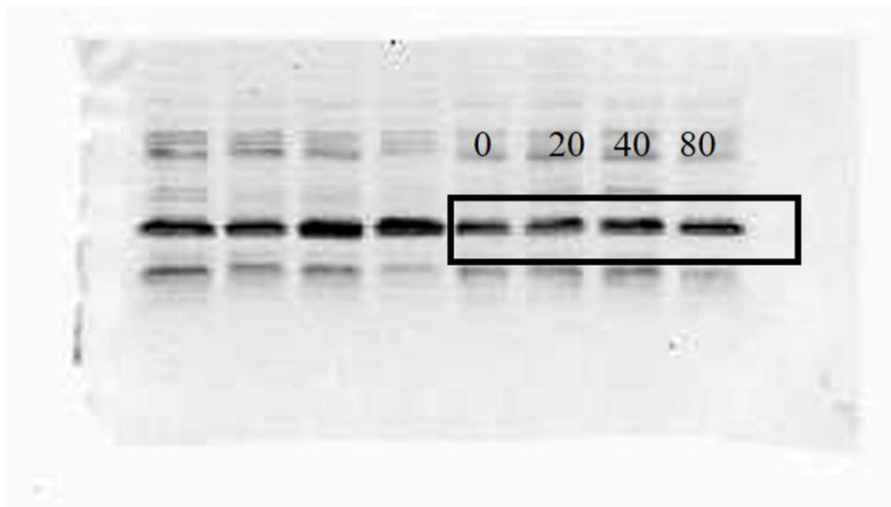

Bax  
48 h

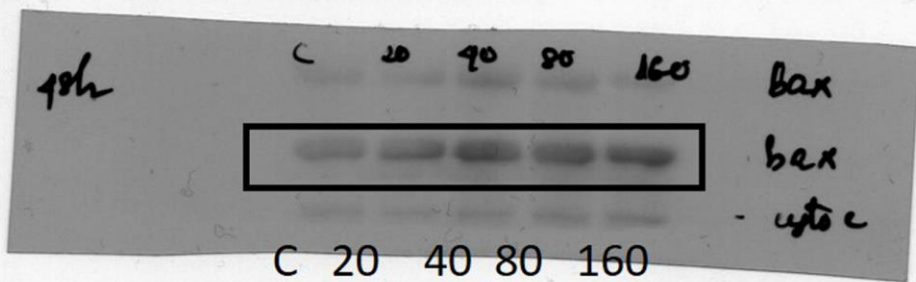

Bax  
48 h

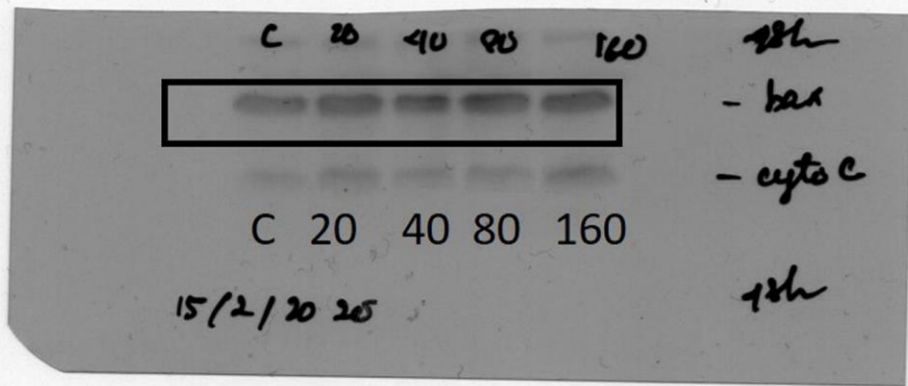

Bcl-2

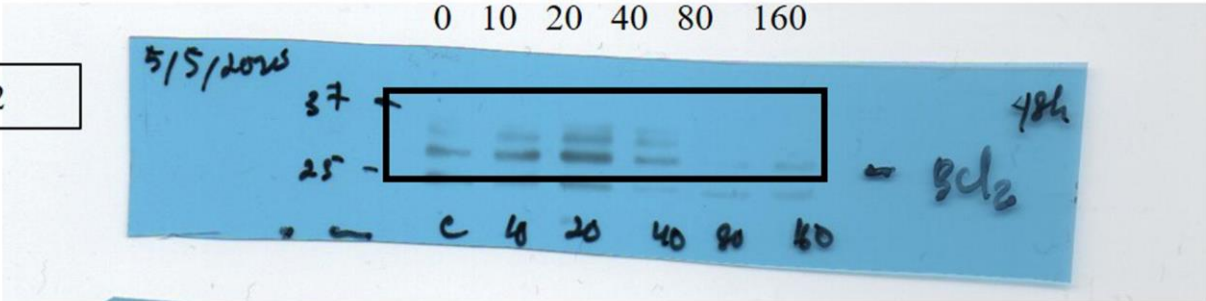

Bcl-2

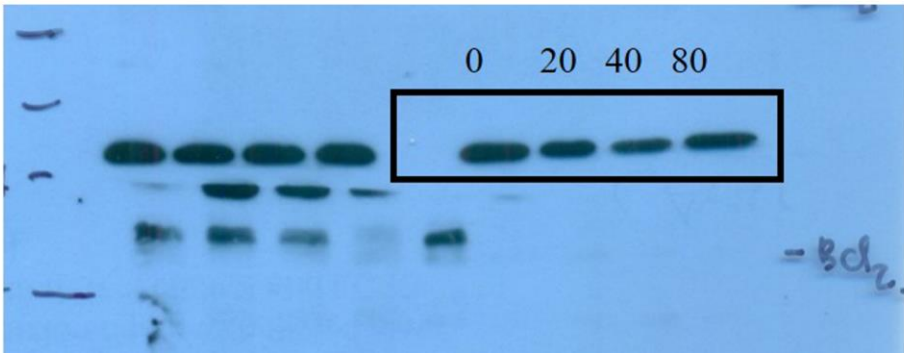

Bcl-2

48 h



**Fig. 3h**

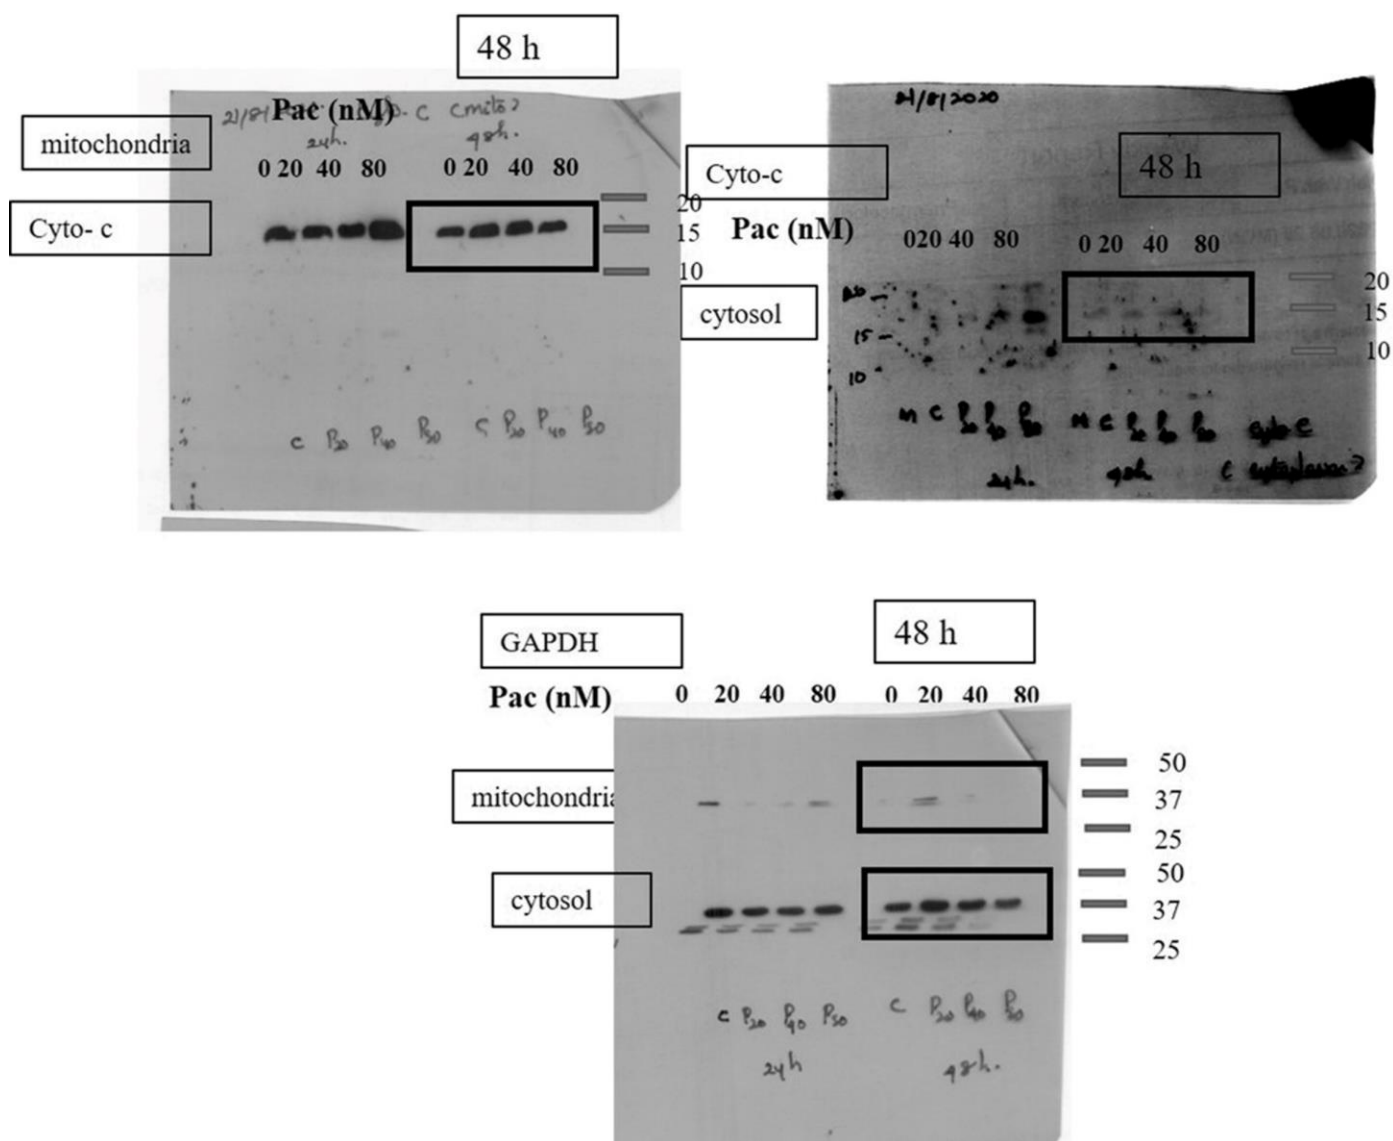

# Supporting data

Fig. DD Photographs of the replicated full-length blots utilized in Figure 4

**Fig. 4a**

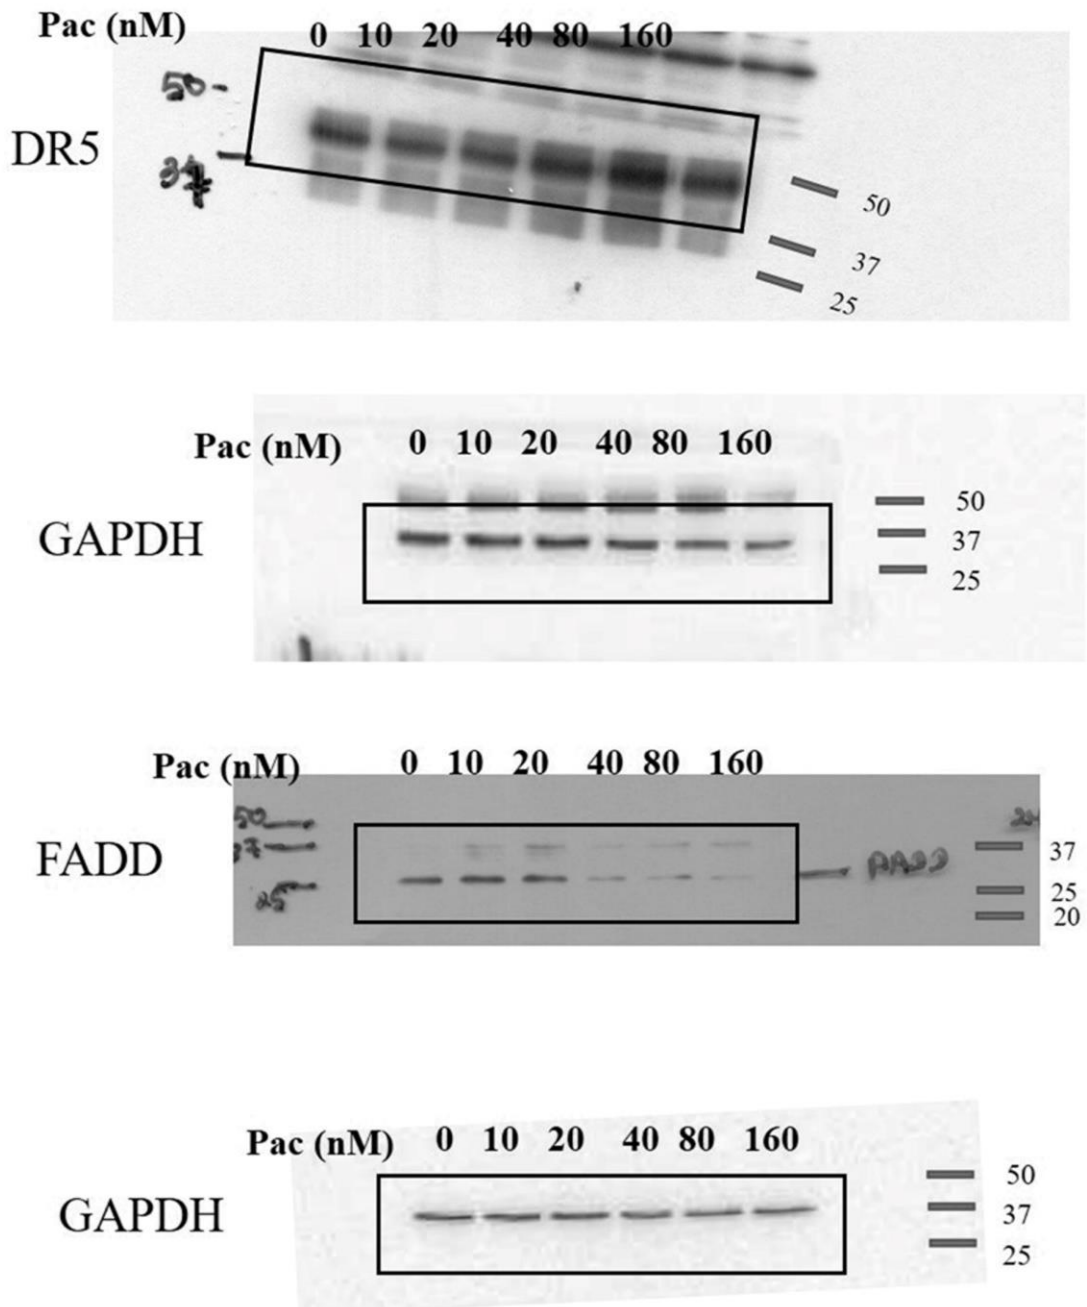

DR5

DR5

24 h

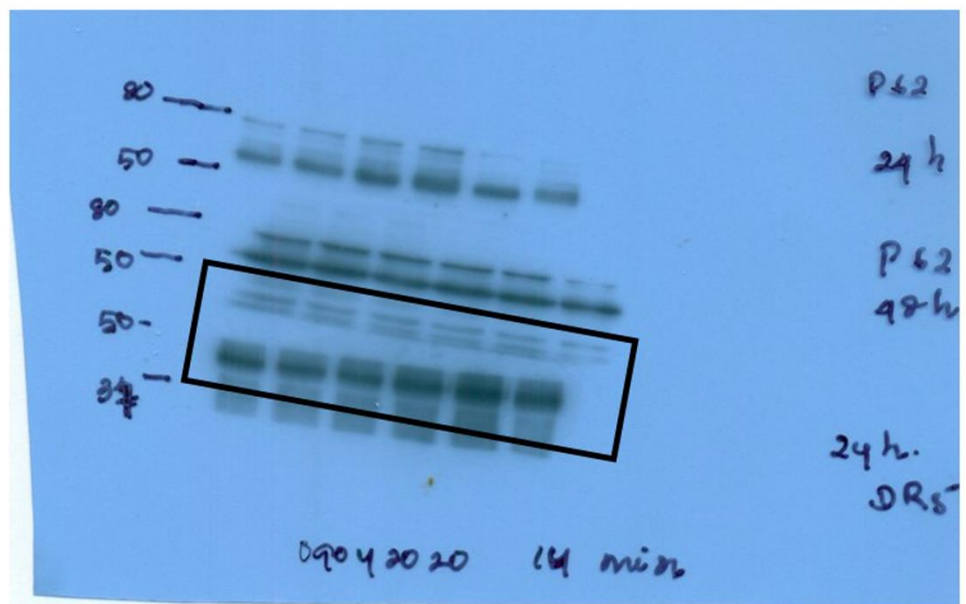

DR5

24 h

48h

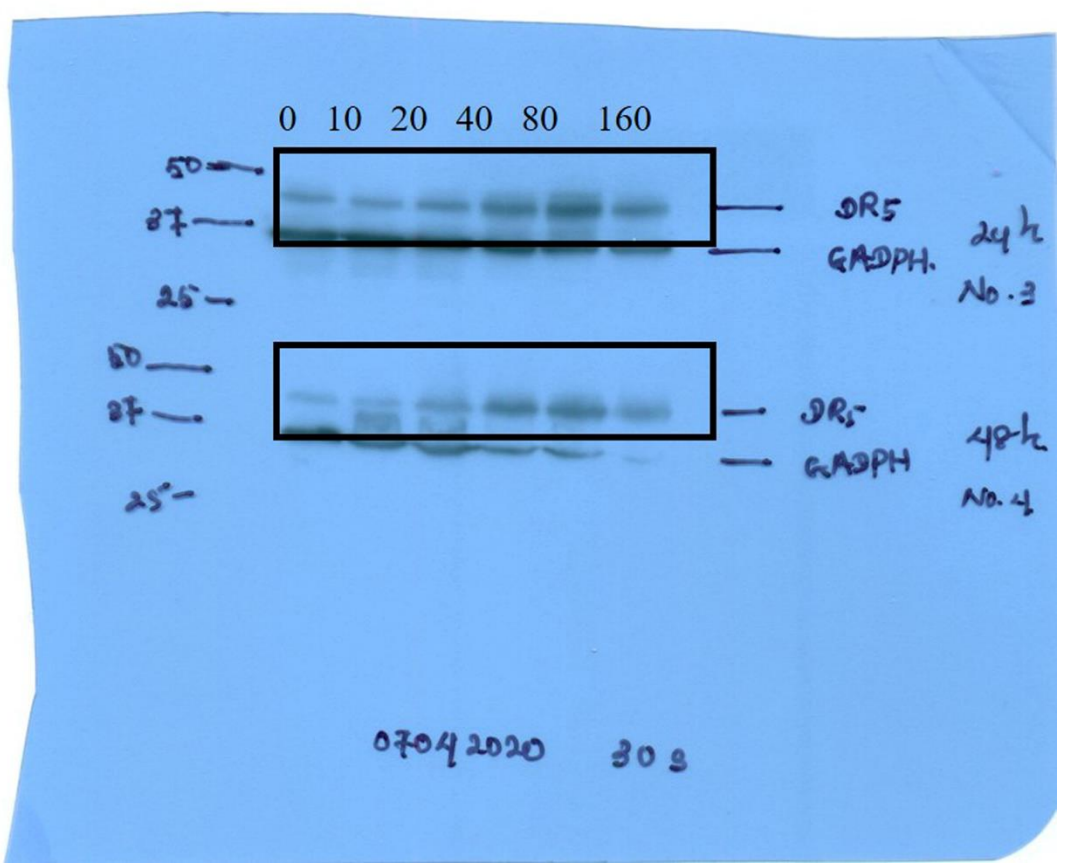

DR5

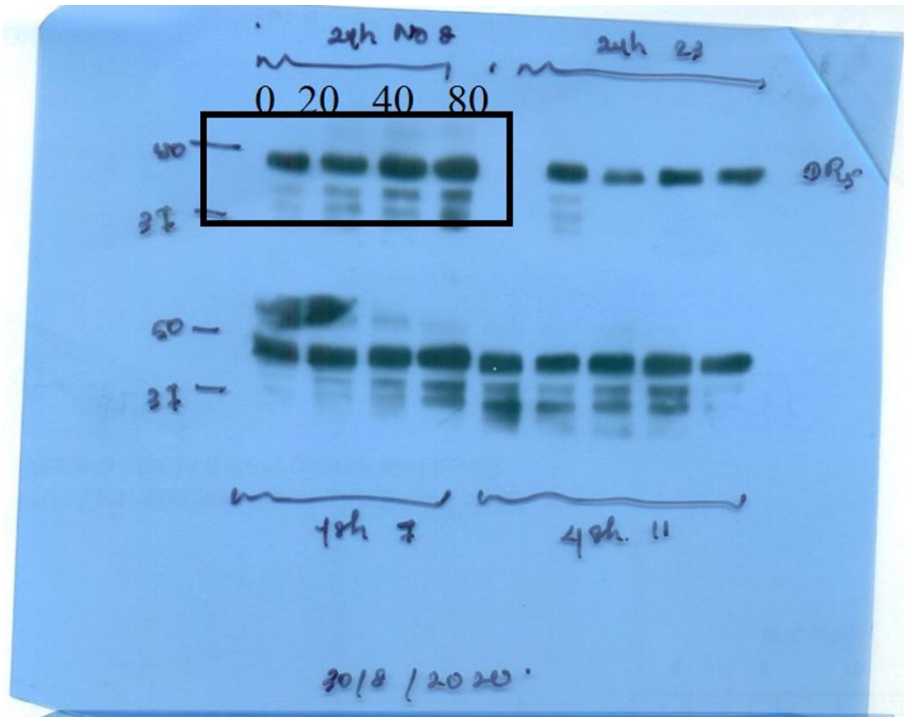

24h

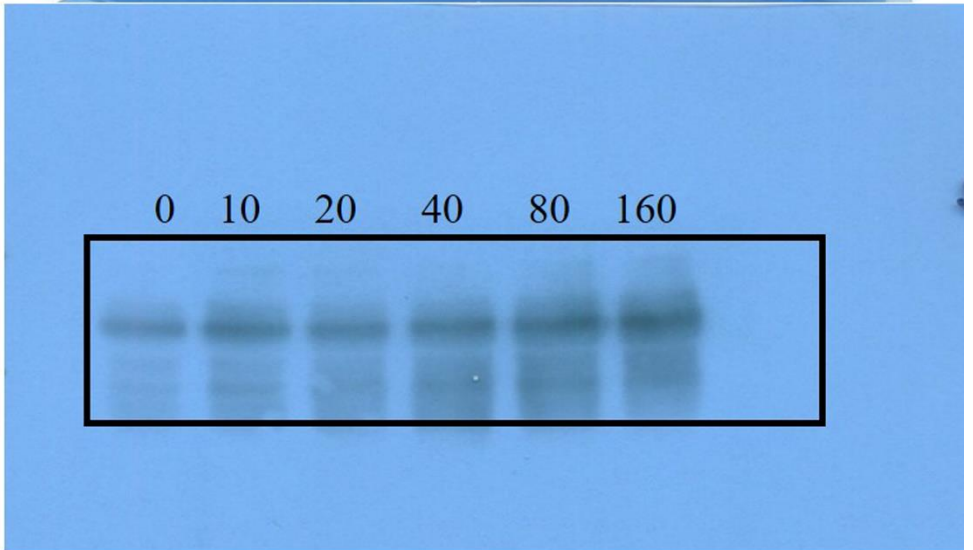

DR5

24 h

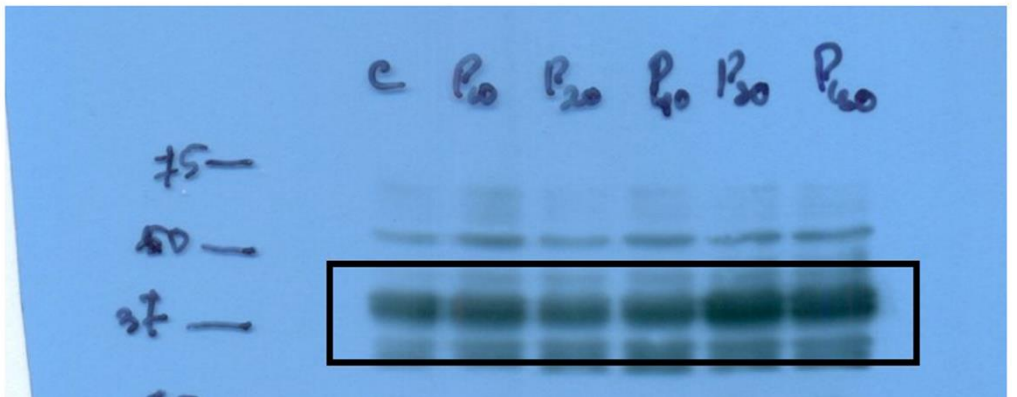

FADD

24 h

FADD

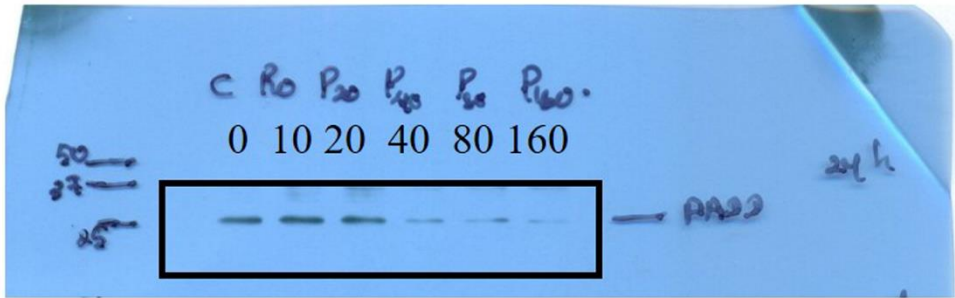

FADD

24 h

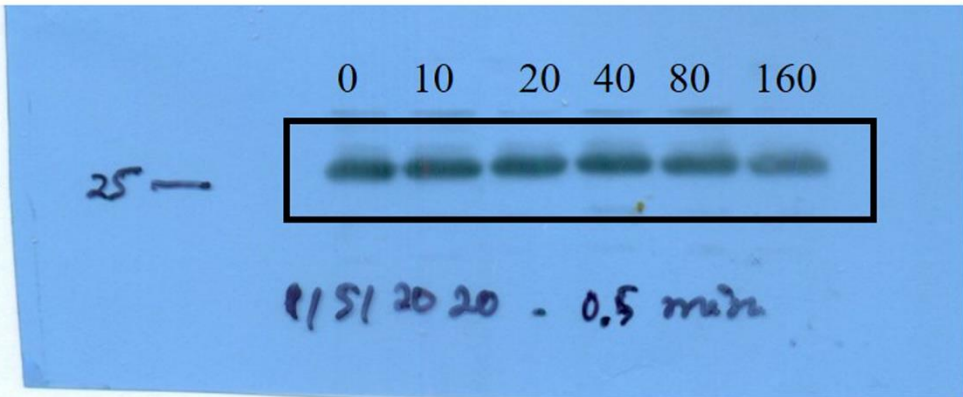

FADD

24 h

48 h

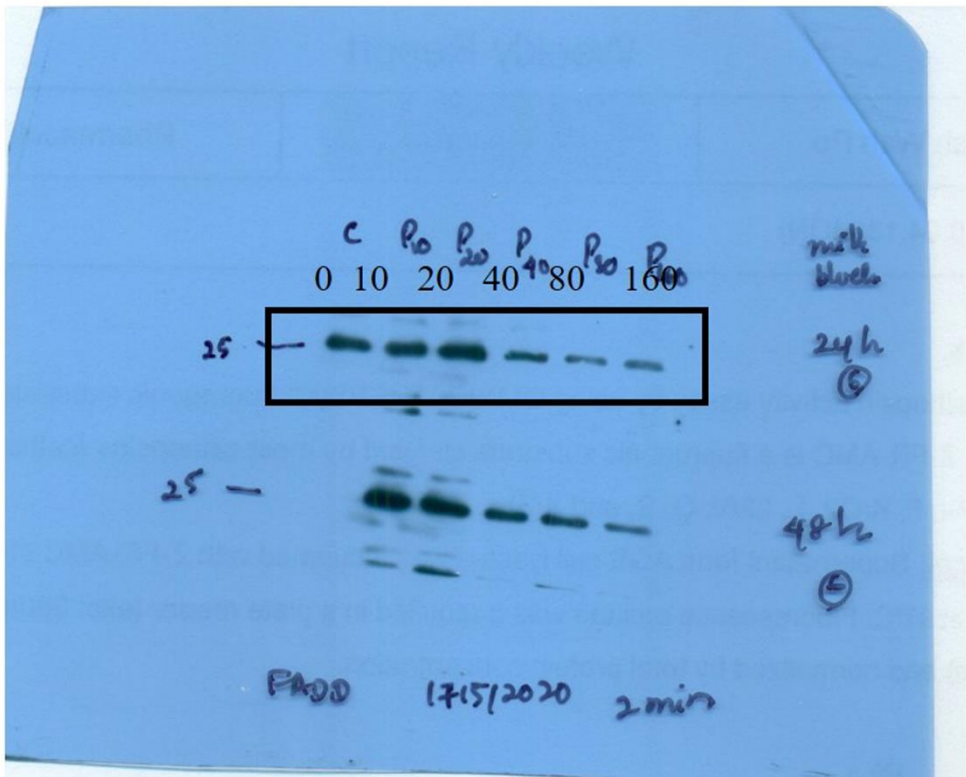

**Fig.4b**

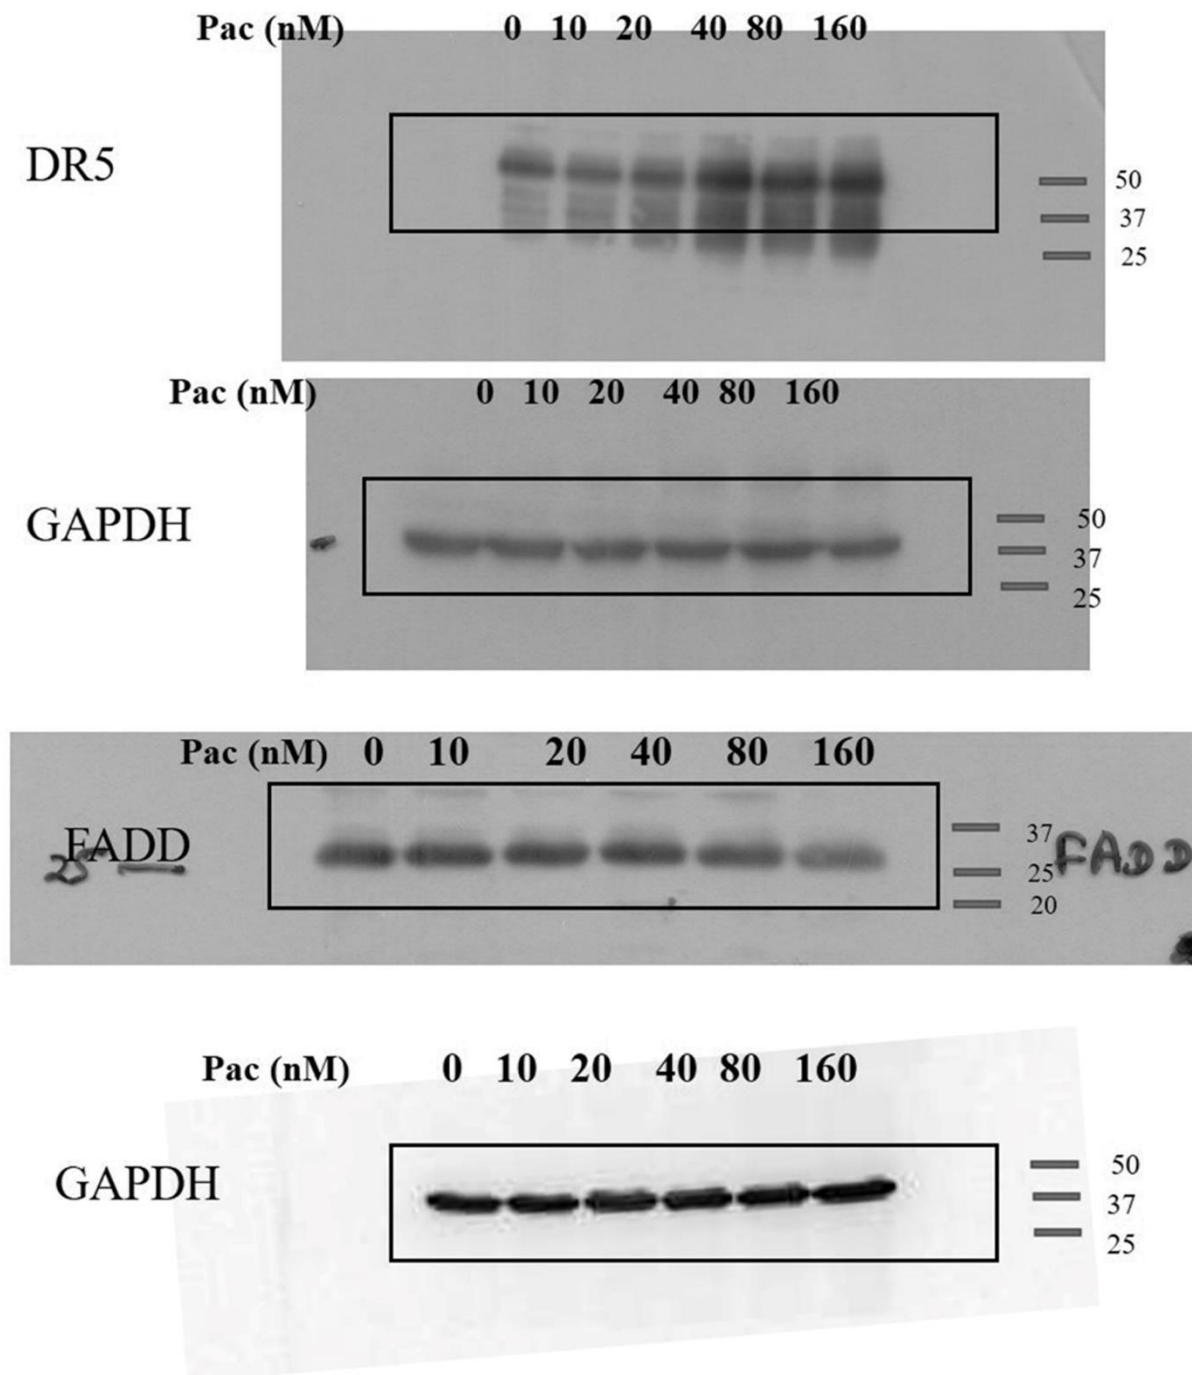

DR5

DR5

48h

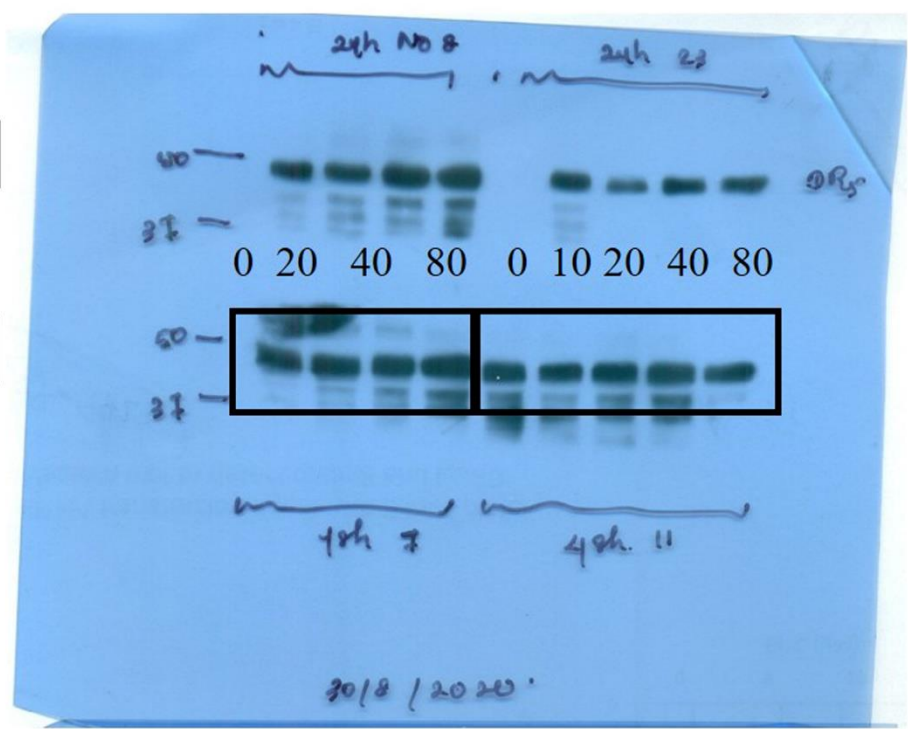

DR5

48h

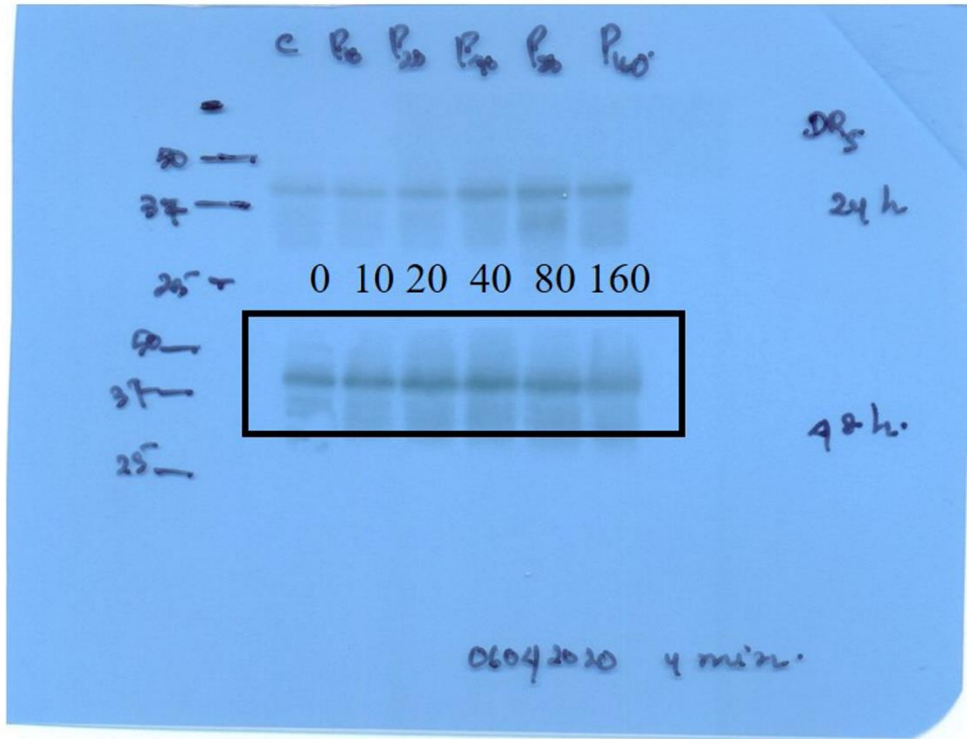

FADD

FADD

24 h

48 h

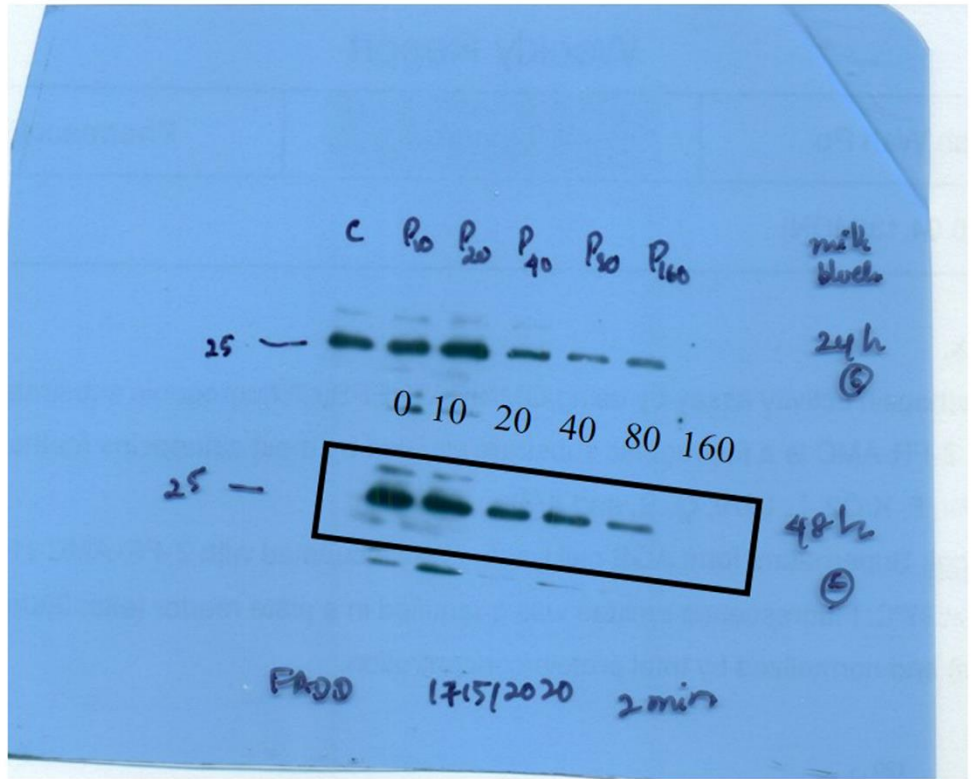

FADD

48 h

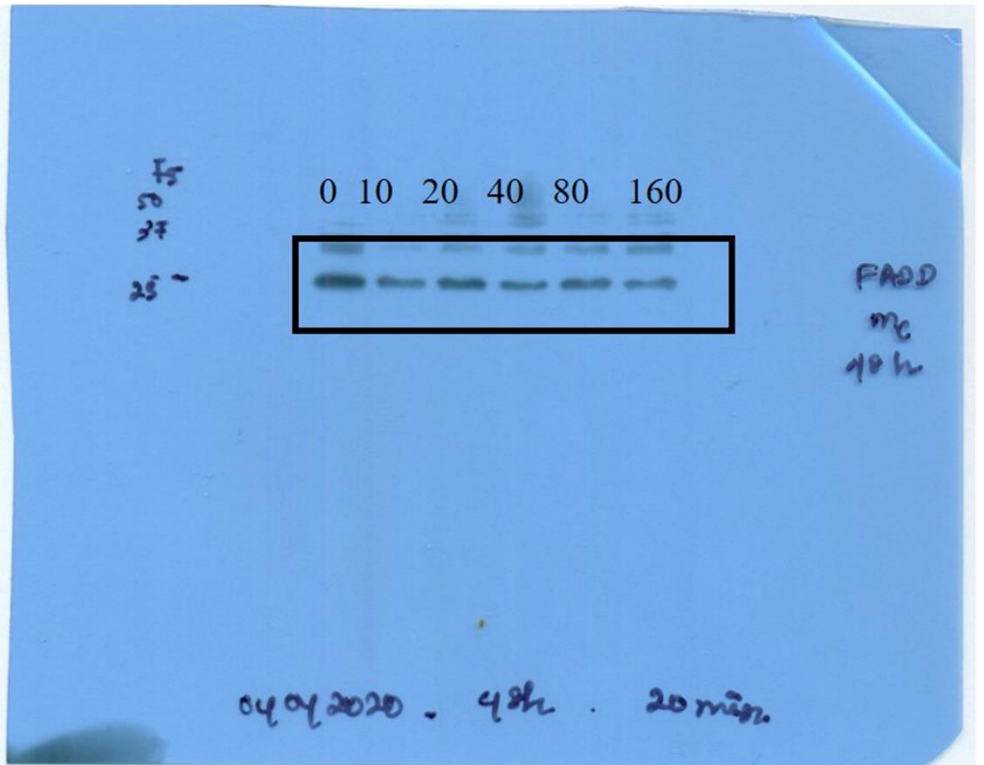

48 h

FADD

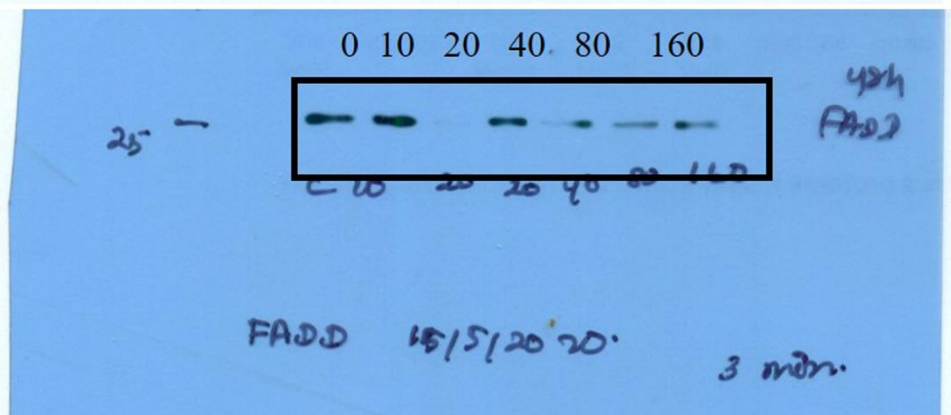



**Fig. 4c**

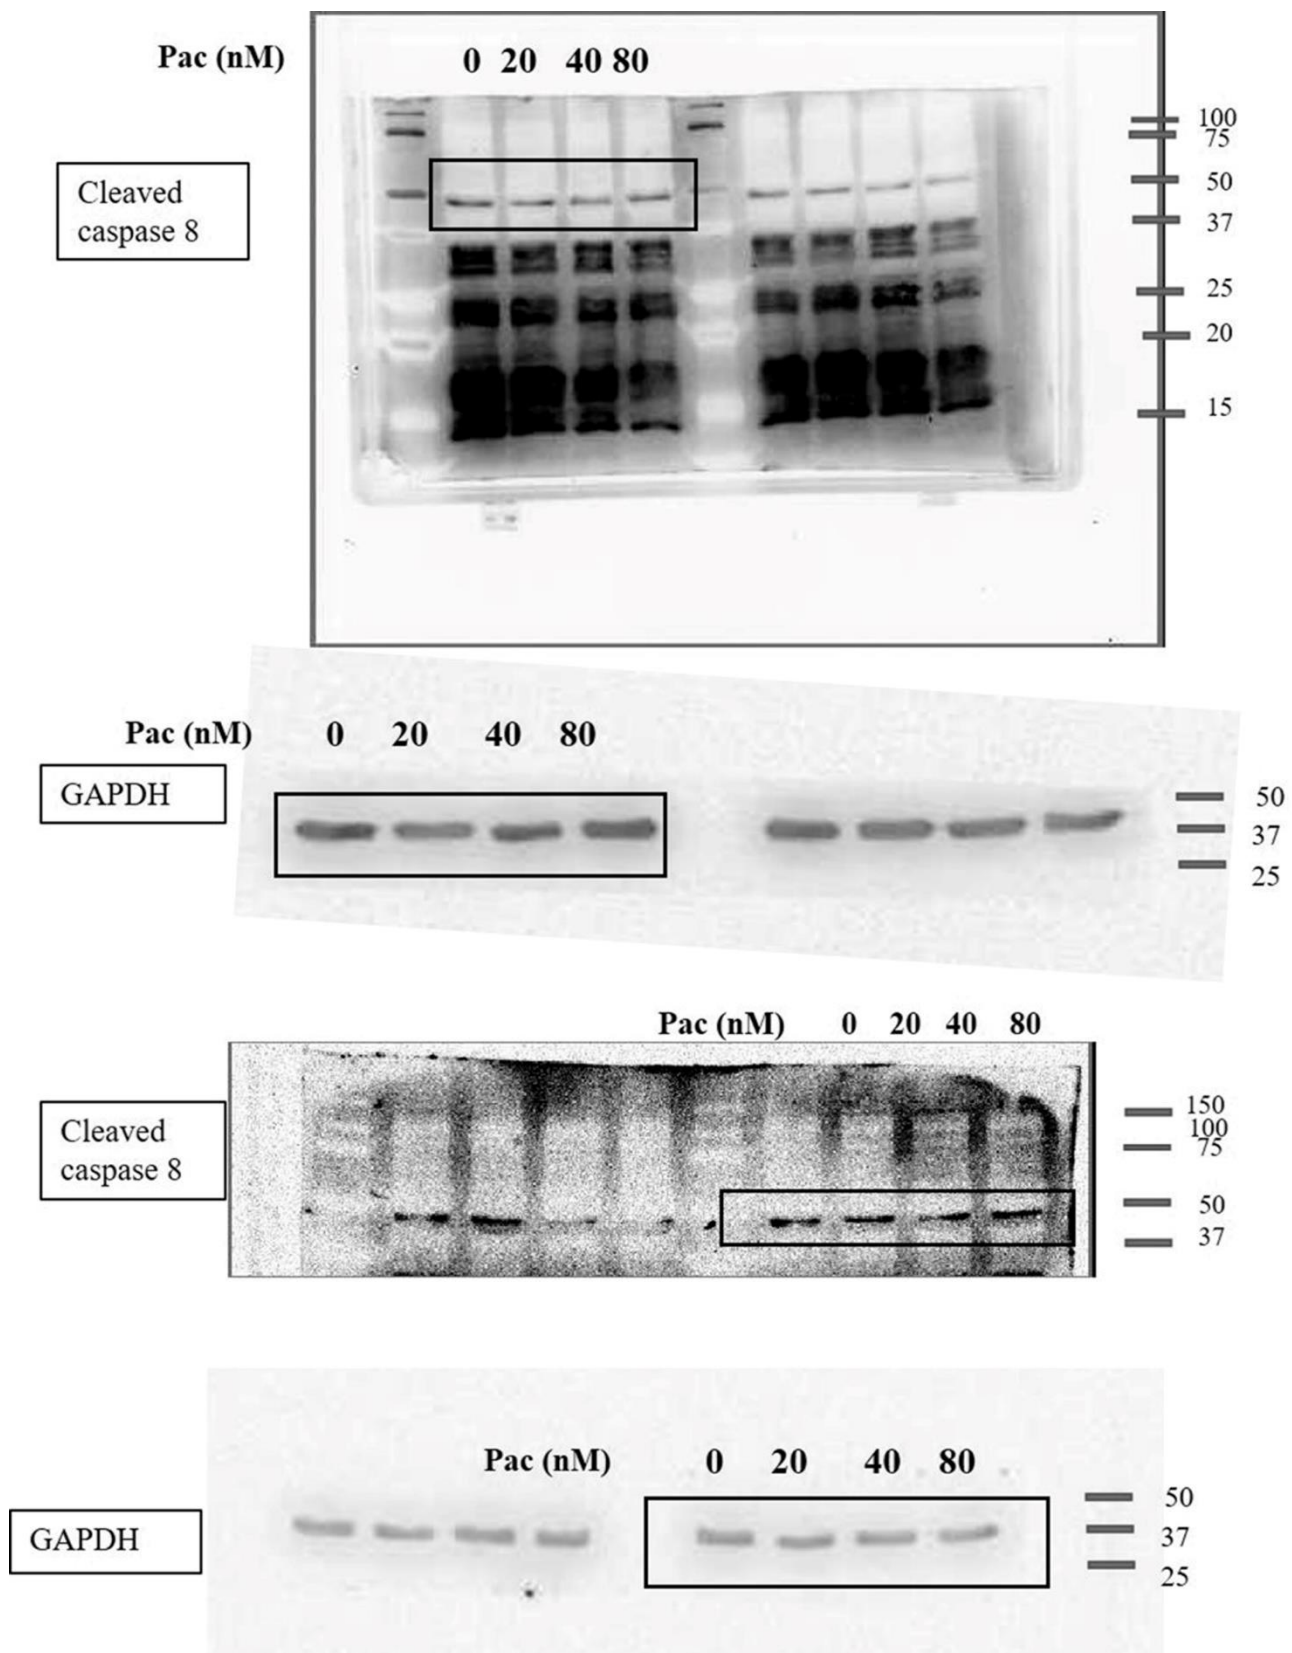

Cleaved caspase 8

24 h

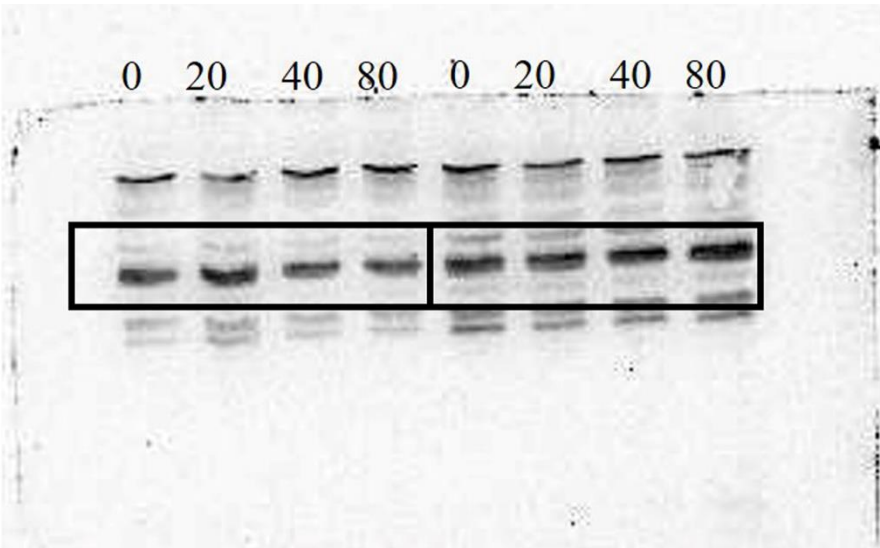

48 h

Cleaved caspase 8

24 h

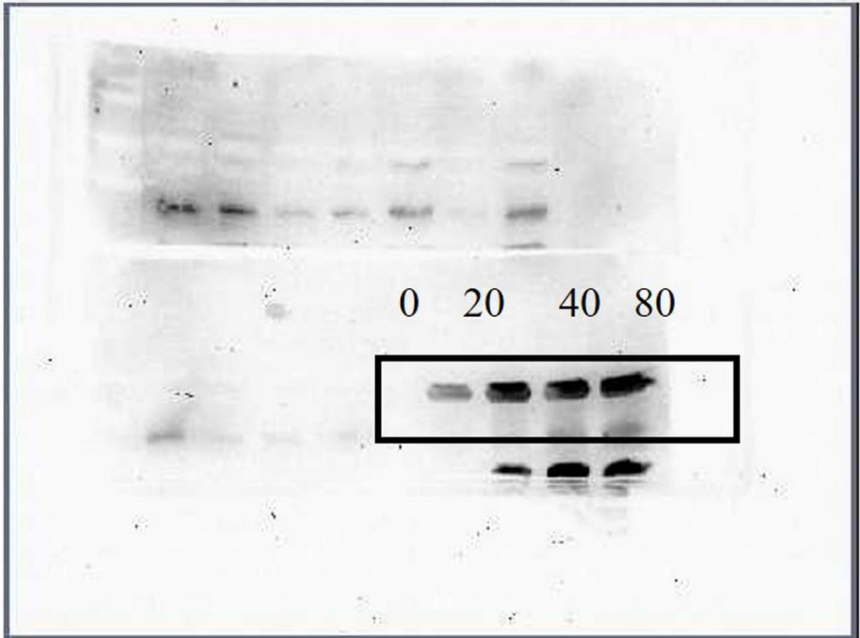

Cleaved caspase 8

48 h

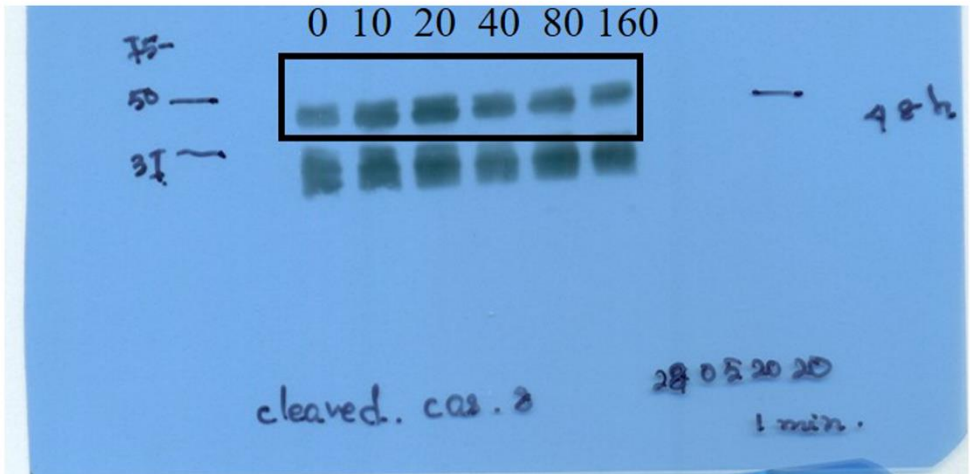

Cleaved  
caspase 8

24 h

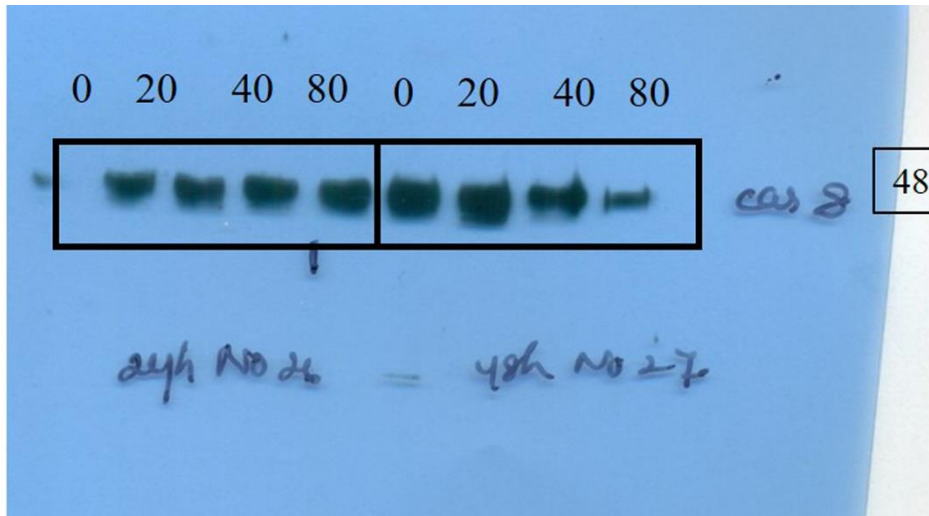

48 h

24h NO 26 - 48h NO 27

# Supporting data

Fig.EE Photographs of the replicated full-length blots described in Figure 5

**Fig. 5c**

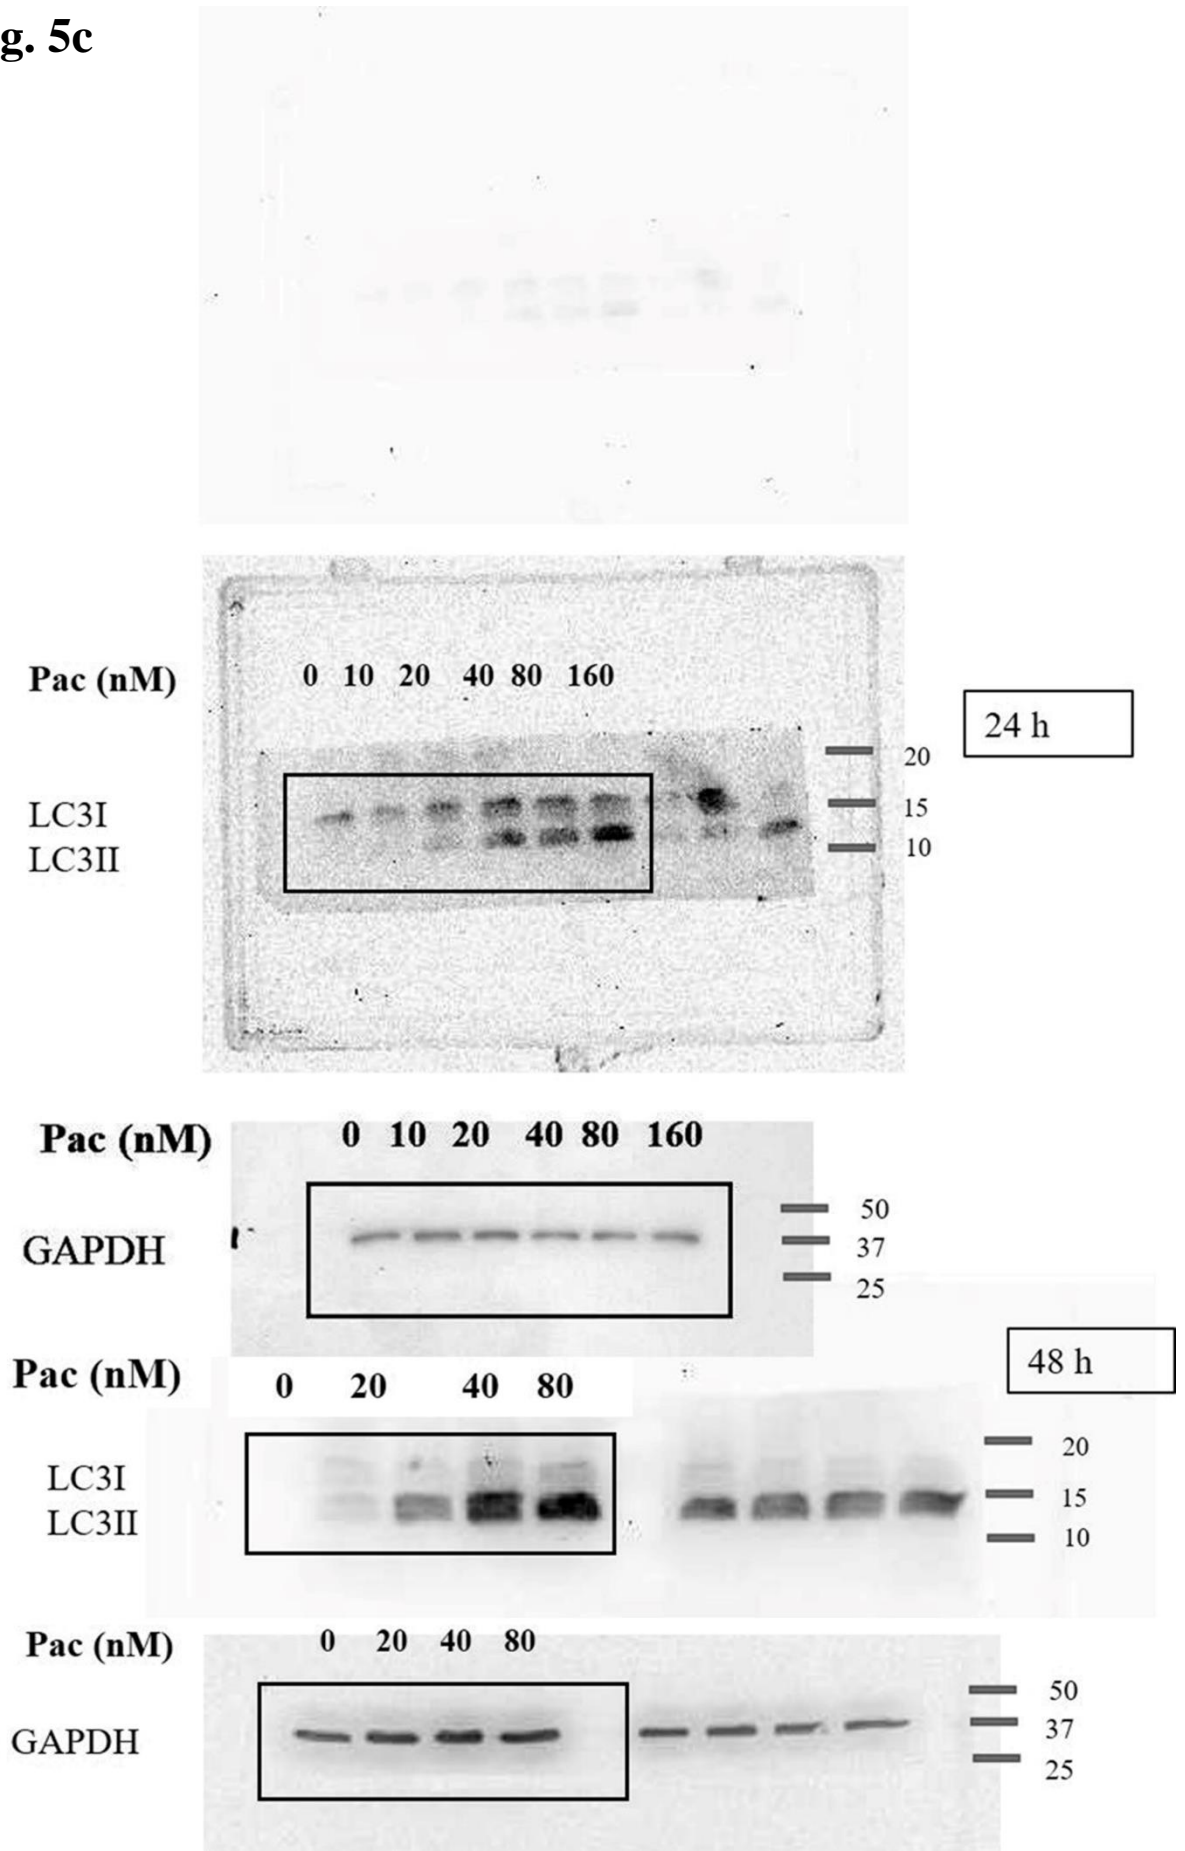

LC3B  
24 h

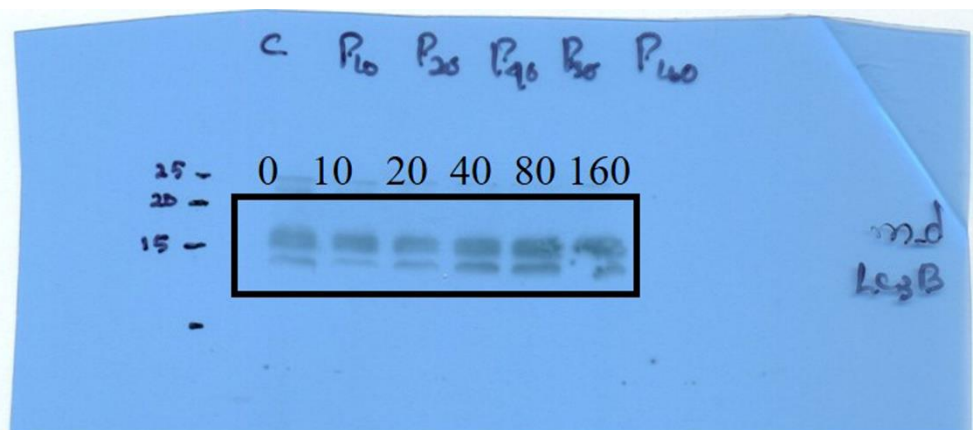

GAPDH

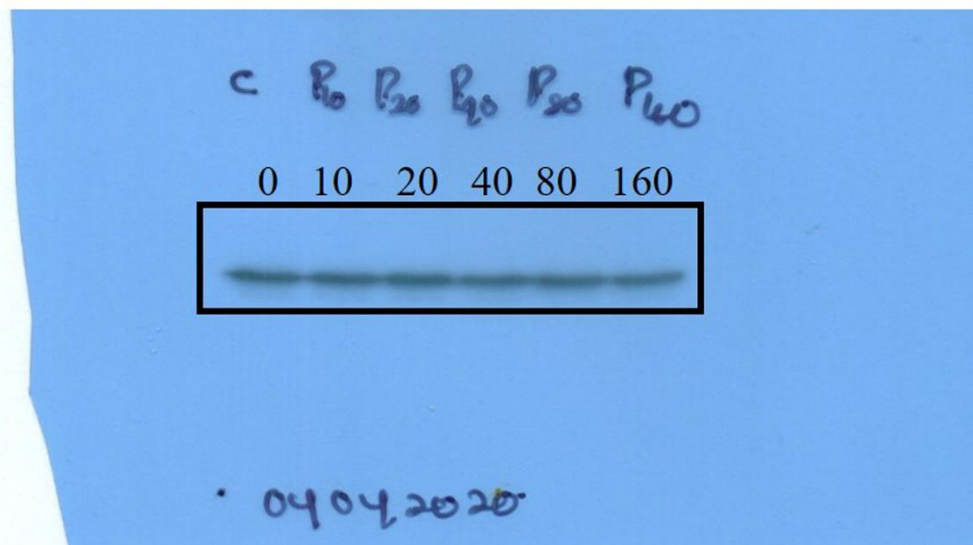

24 h

LC3B

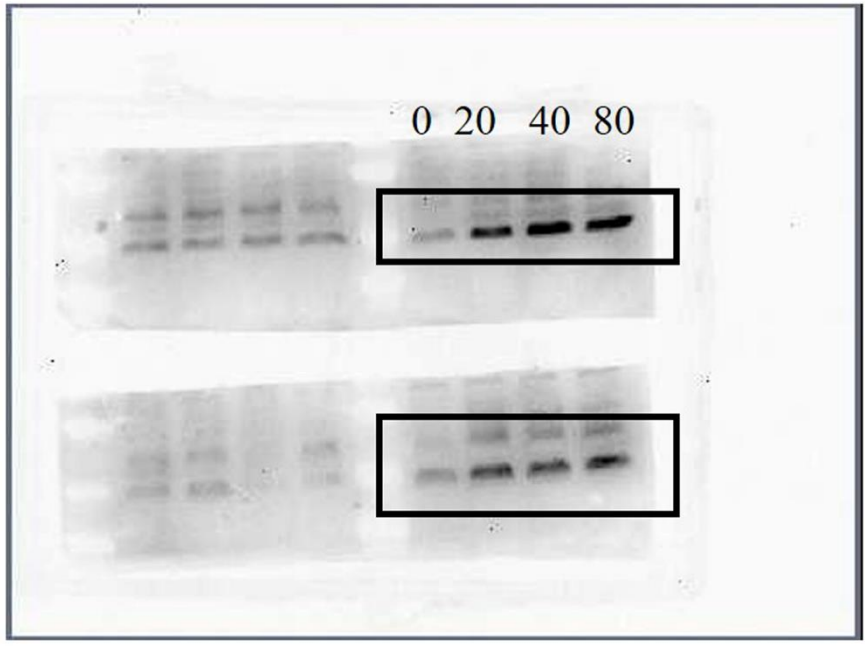

LC3B

24 h

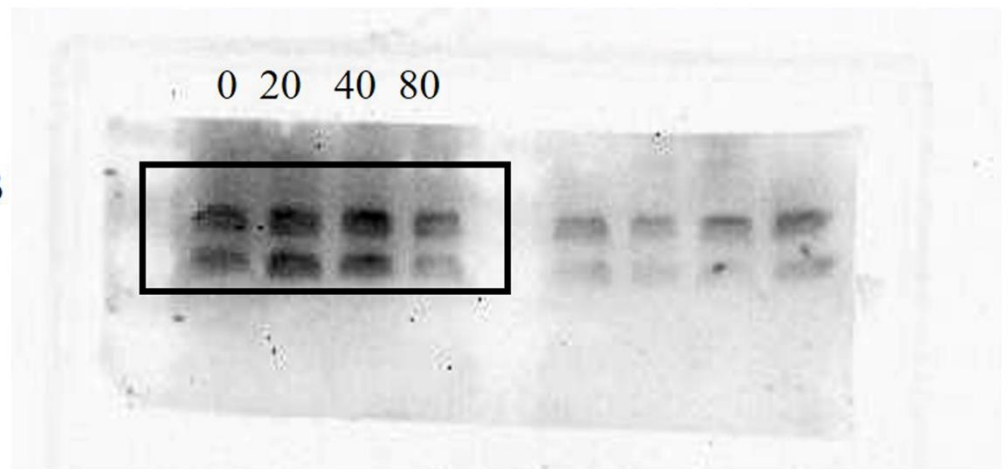

LC3B

24 h

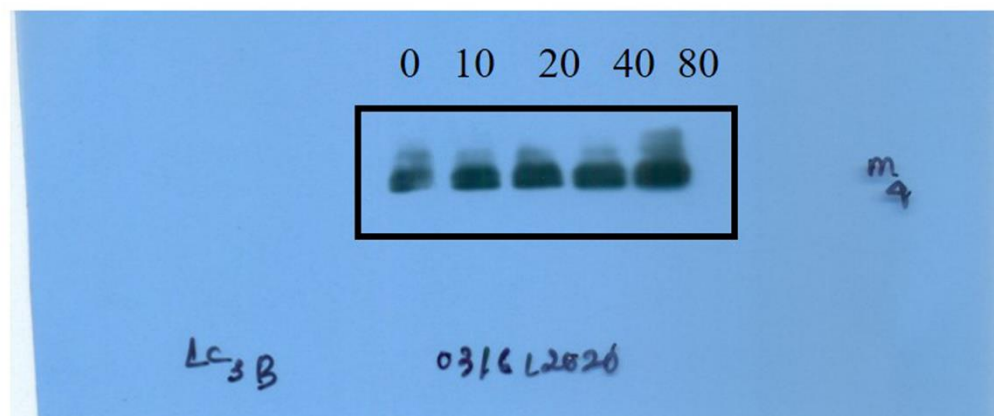

LC3B

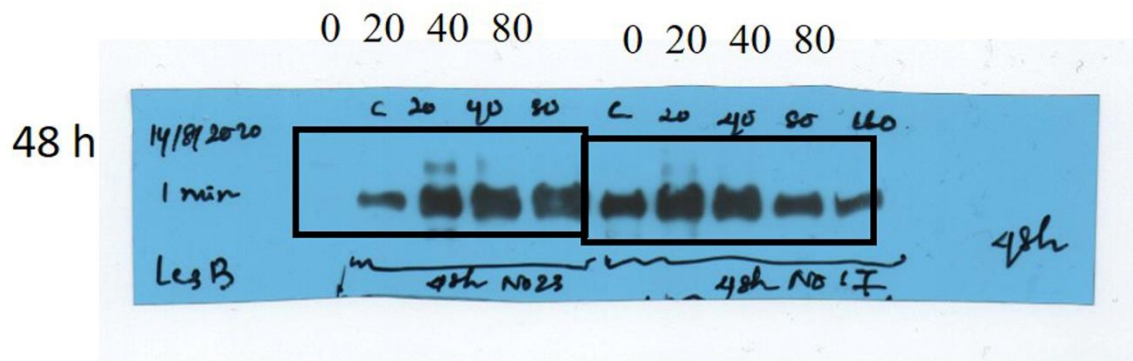

LC3B

48 h

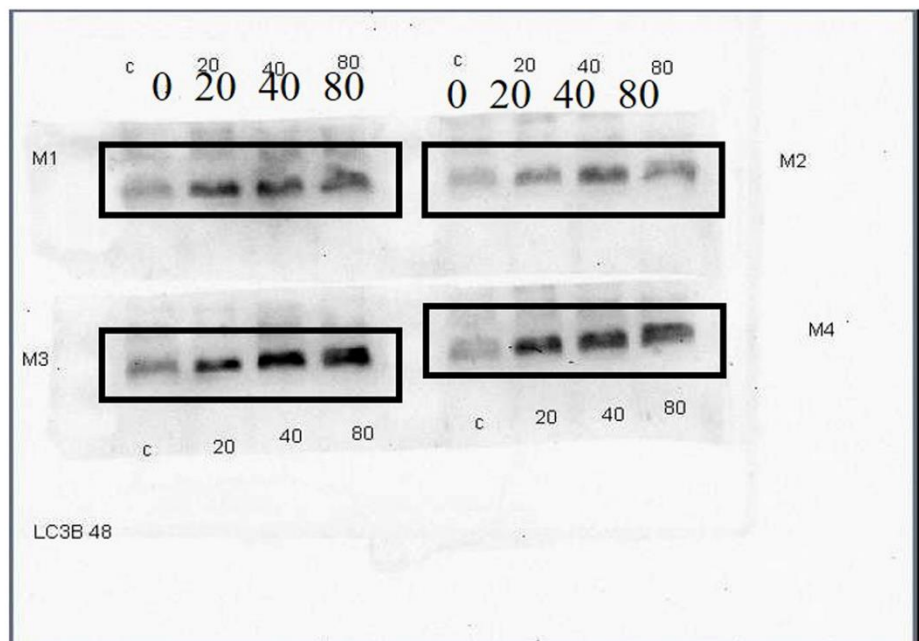

# LC3B

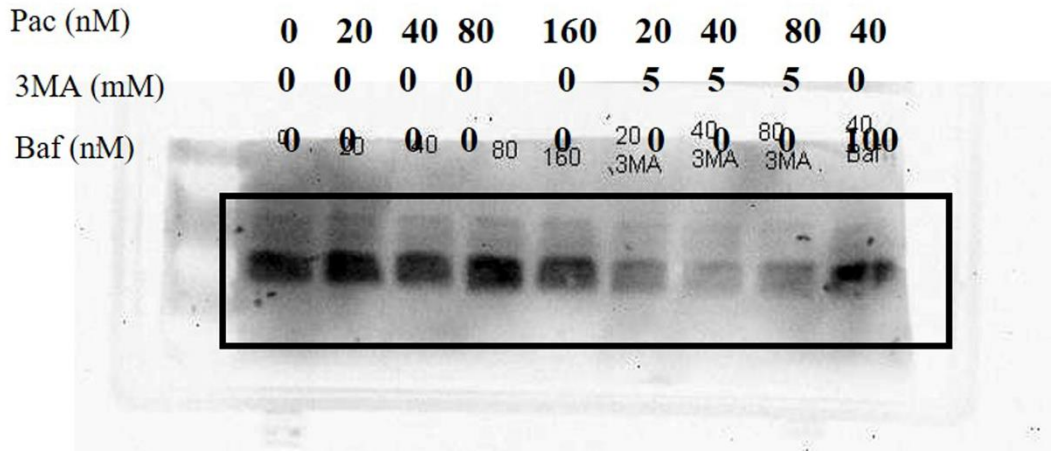

# LC3B

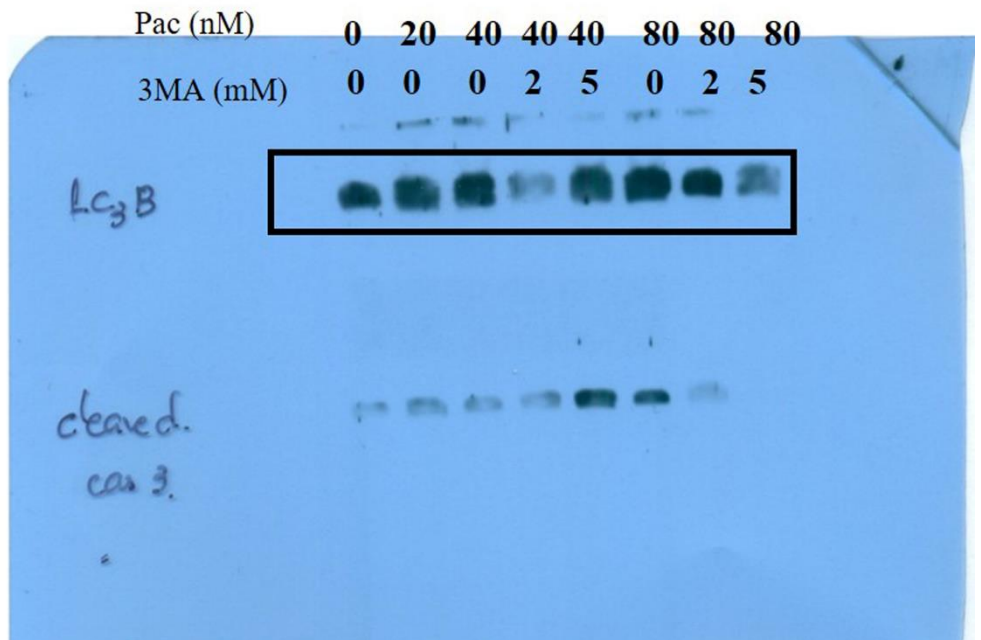



**Fig. 5d**

24 h

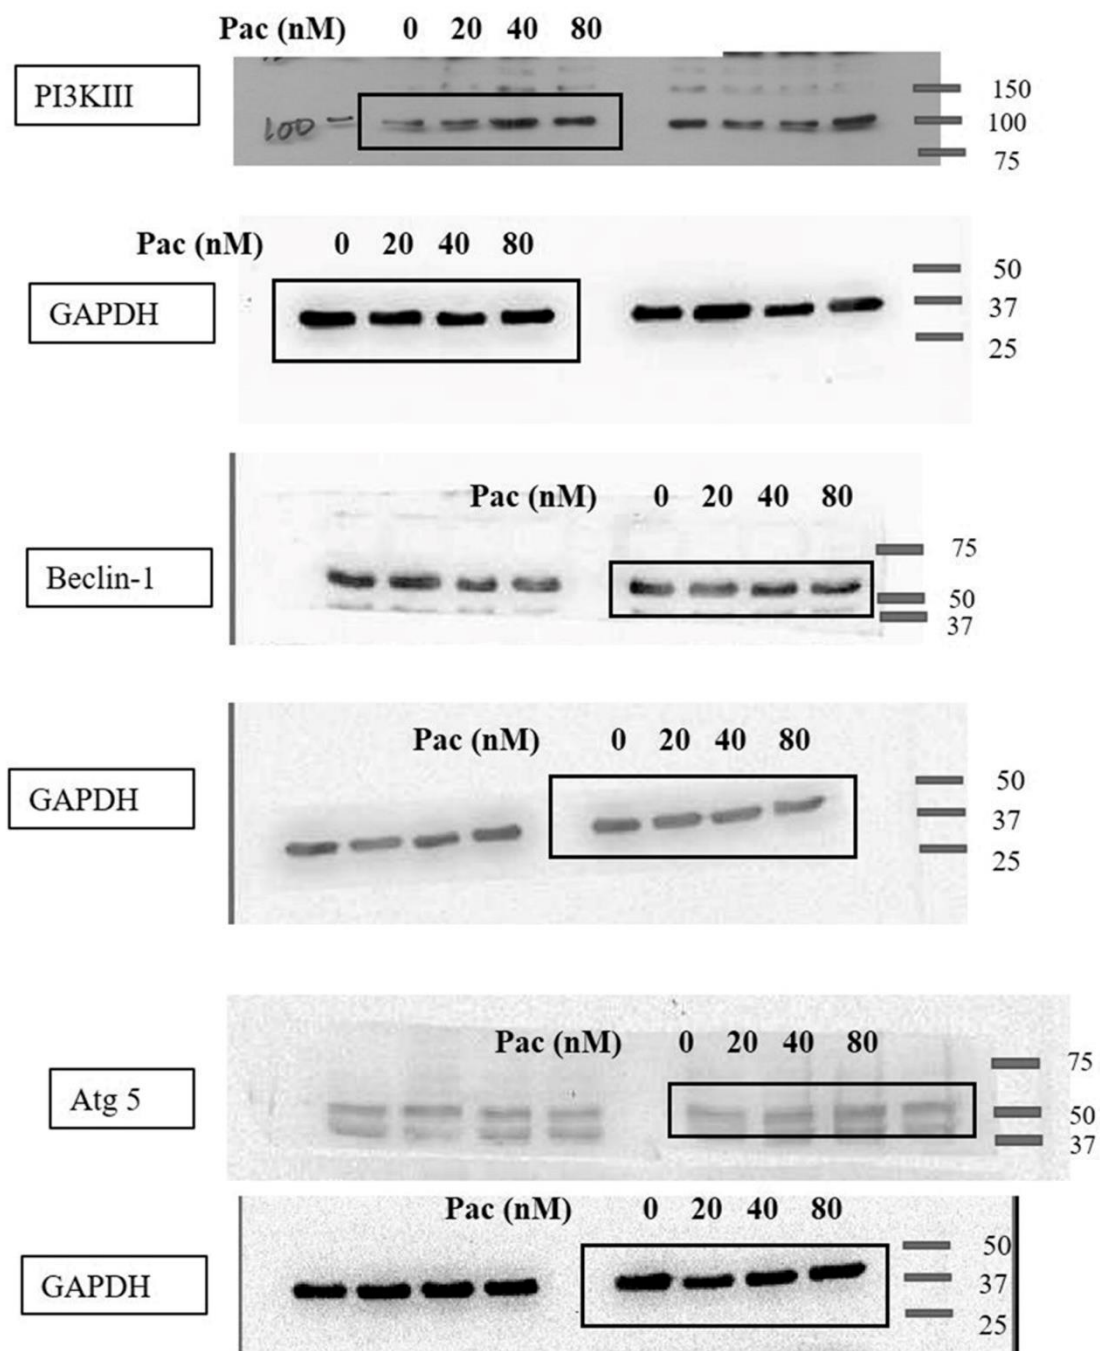

PI3K

24 h

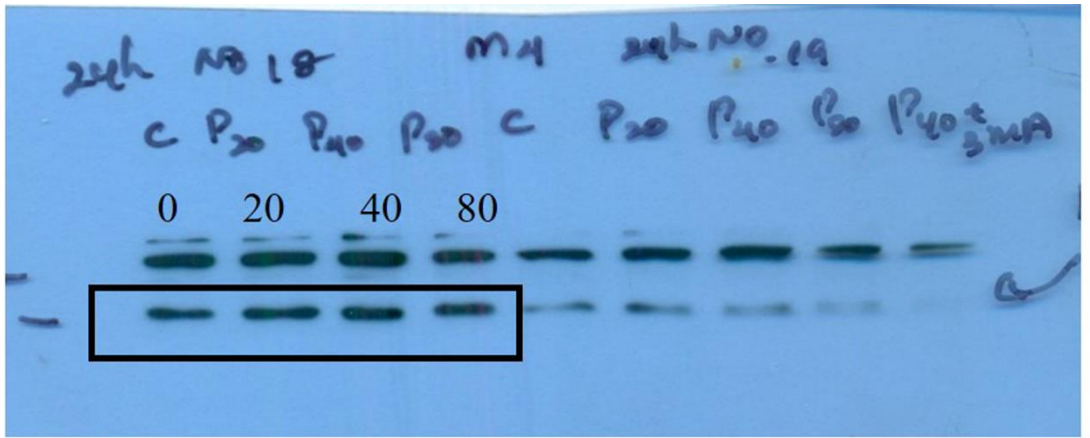

24 h

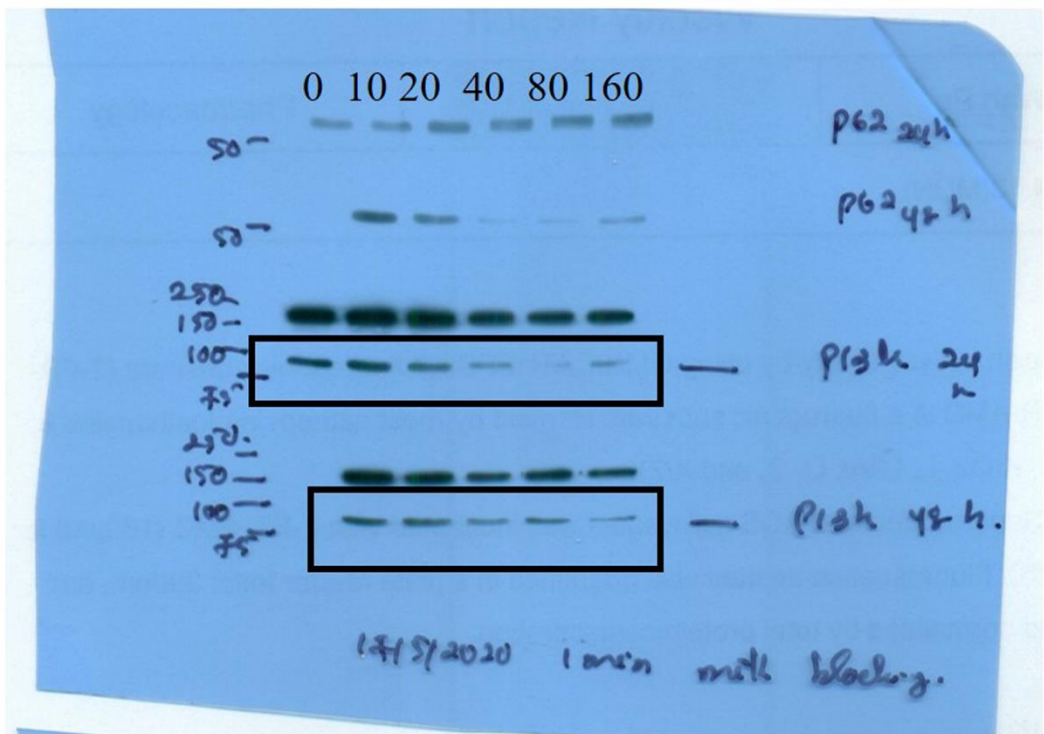

PI3K

24 h

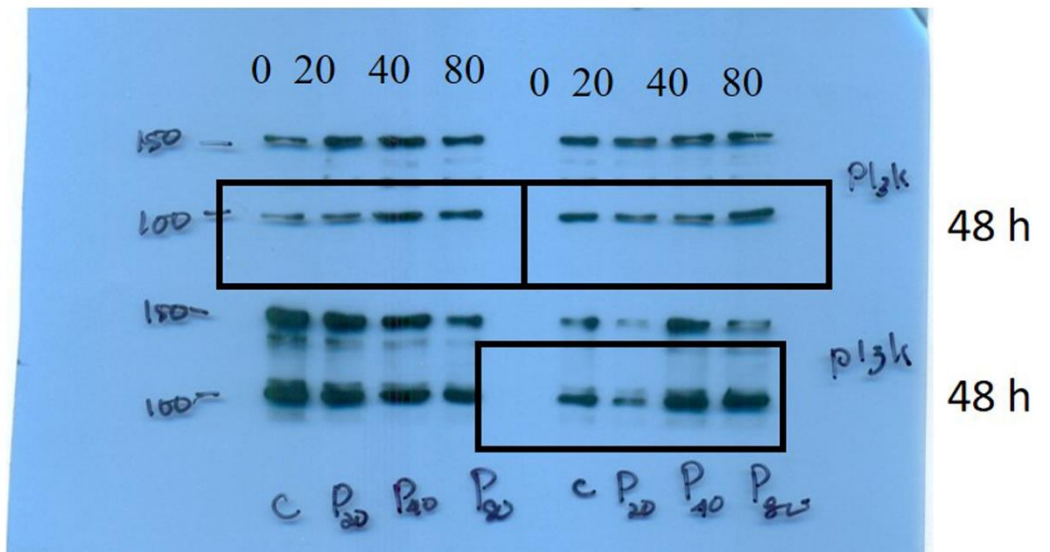

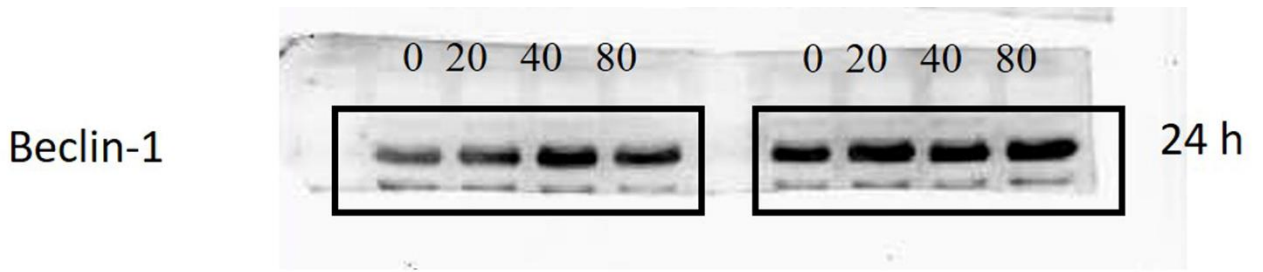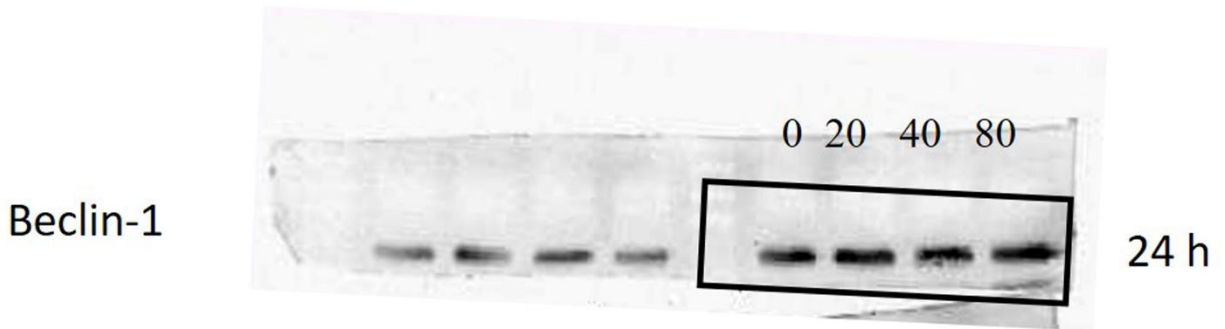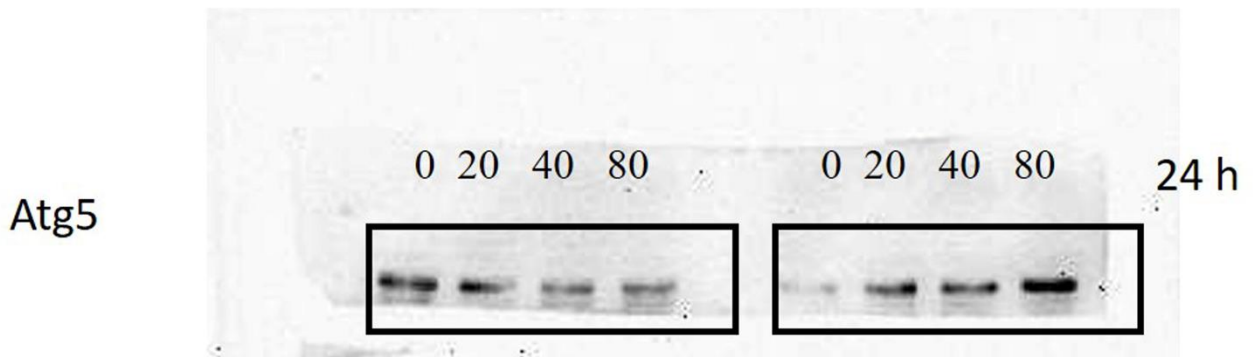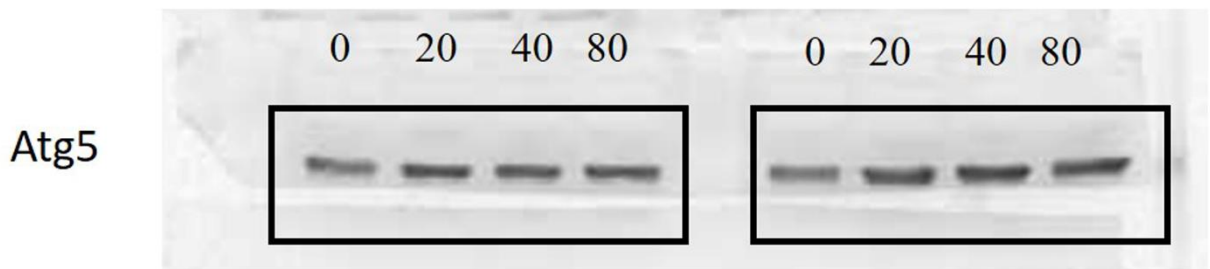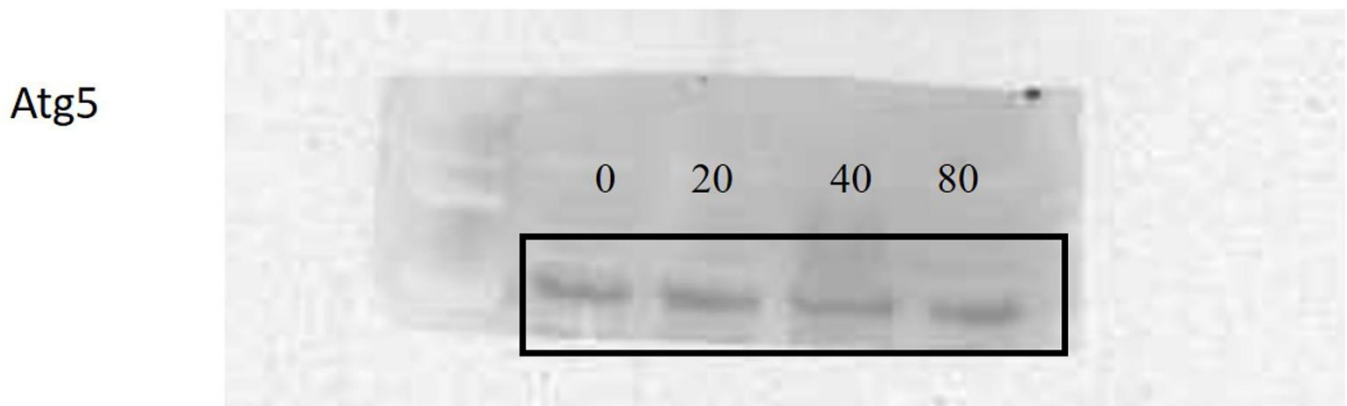

48 h

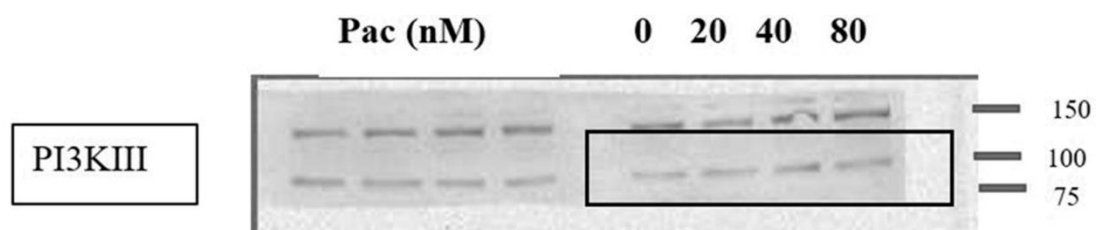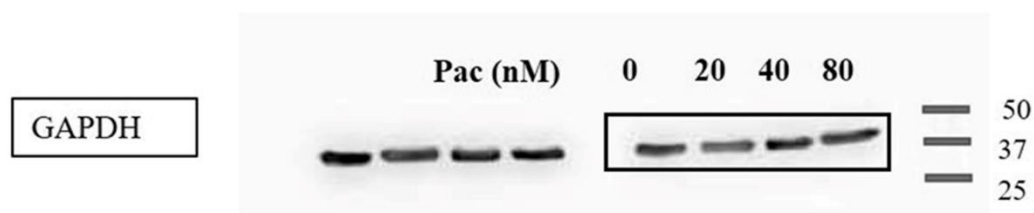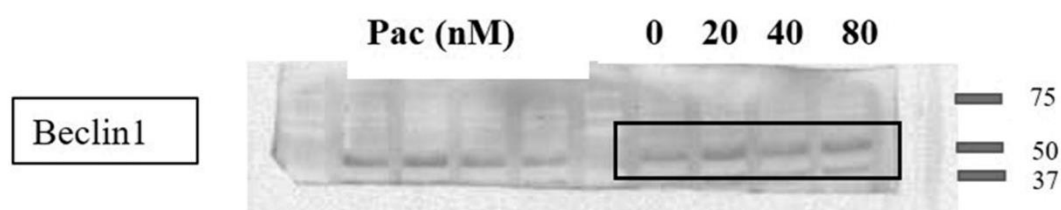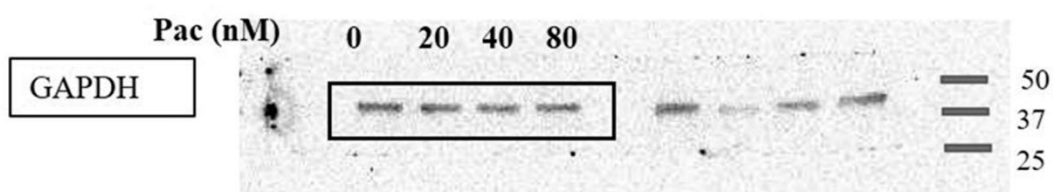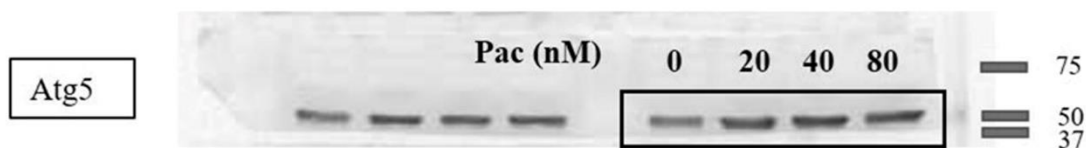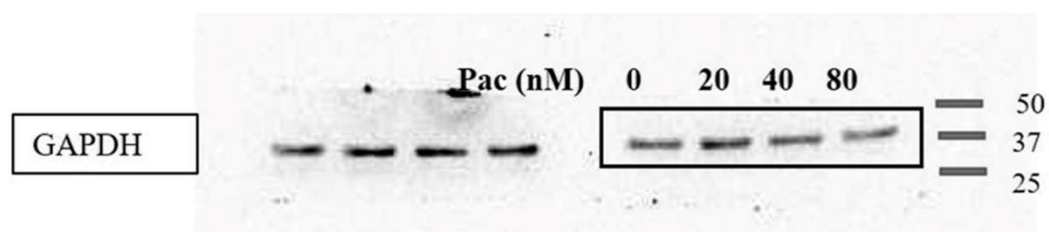

48 h

Atg5

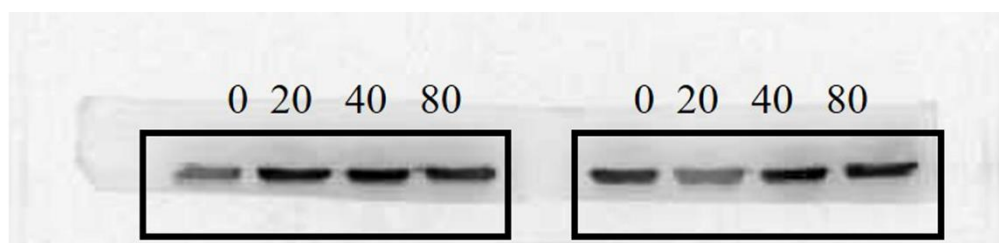

Atg5

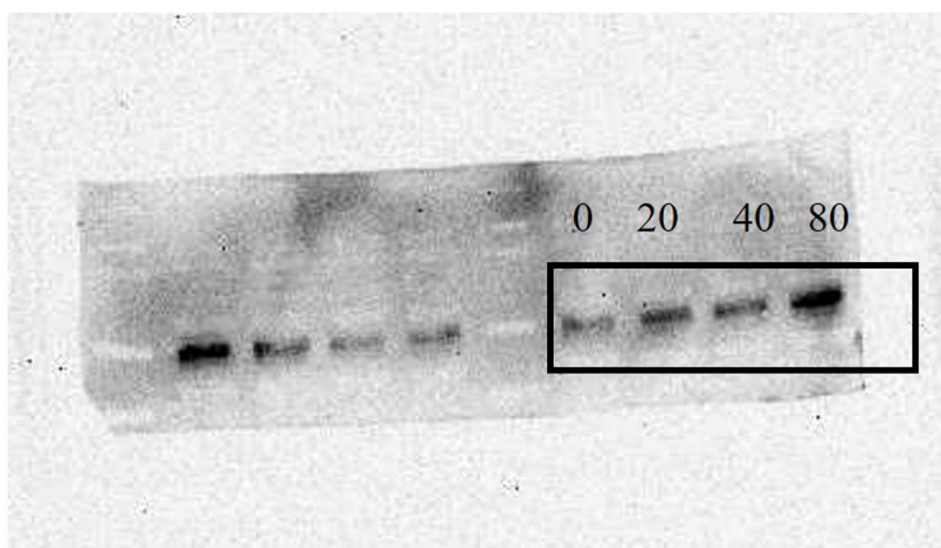

48 h

Atg5

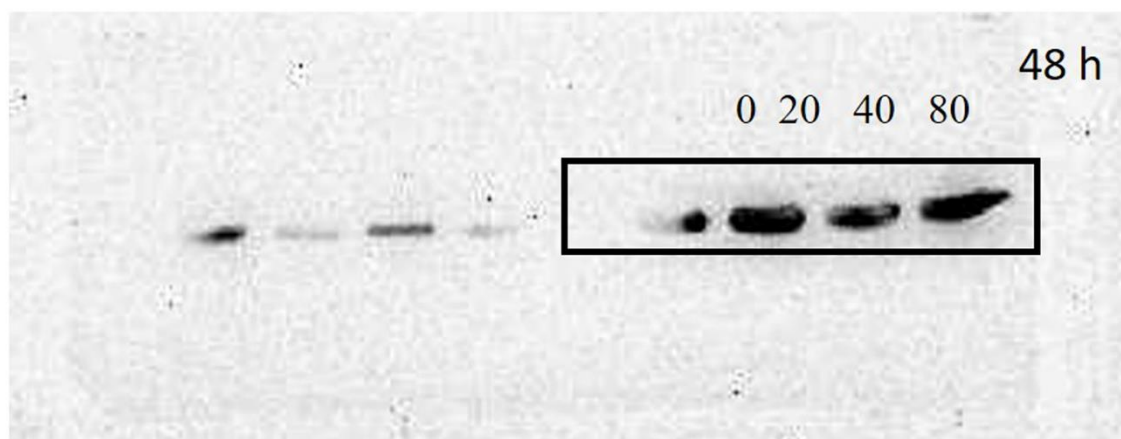

Beclin-1

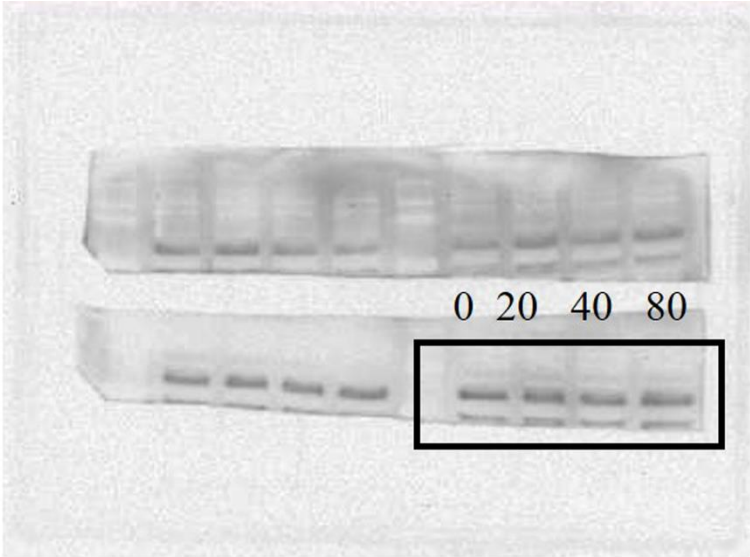

Beclin-1

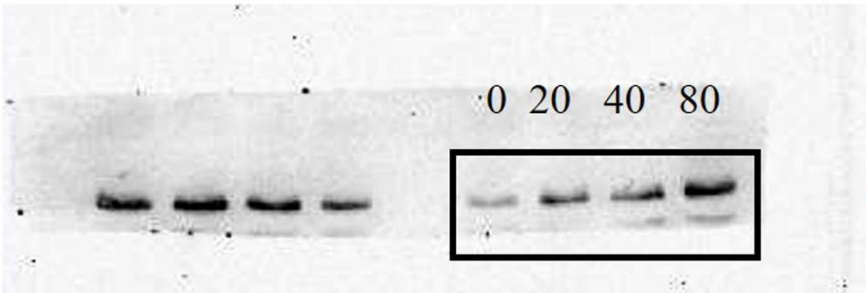

**Fig. 5e**

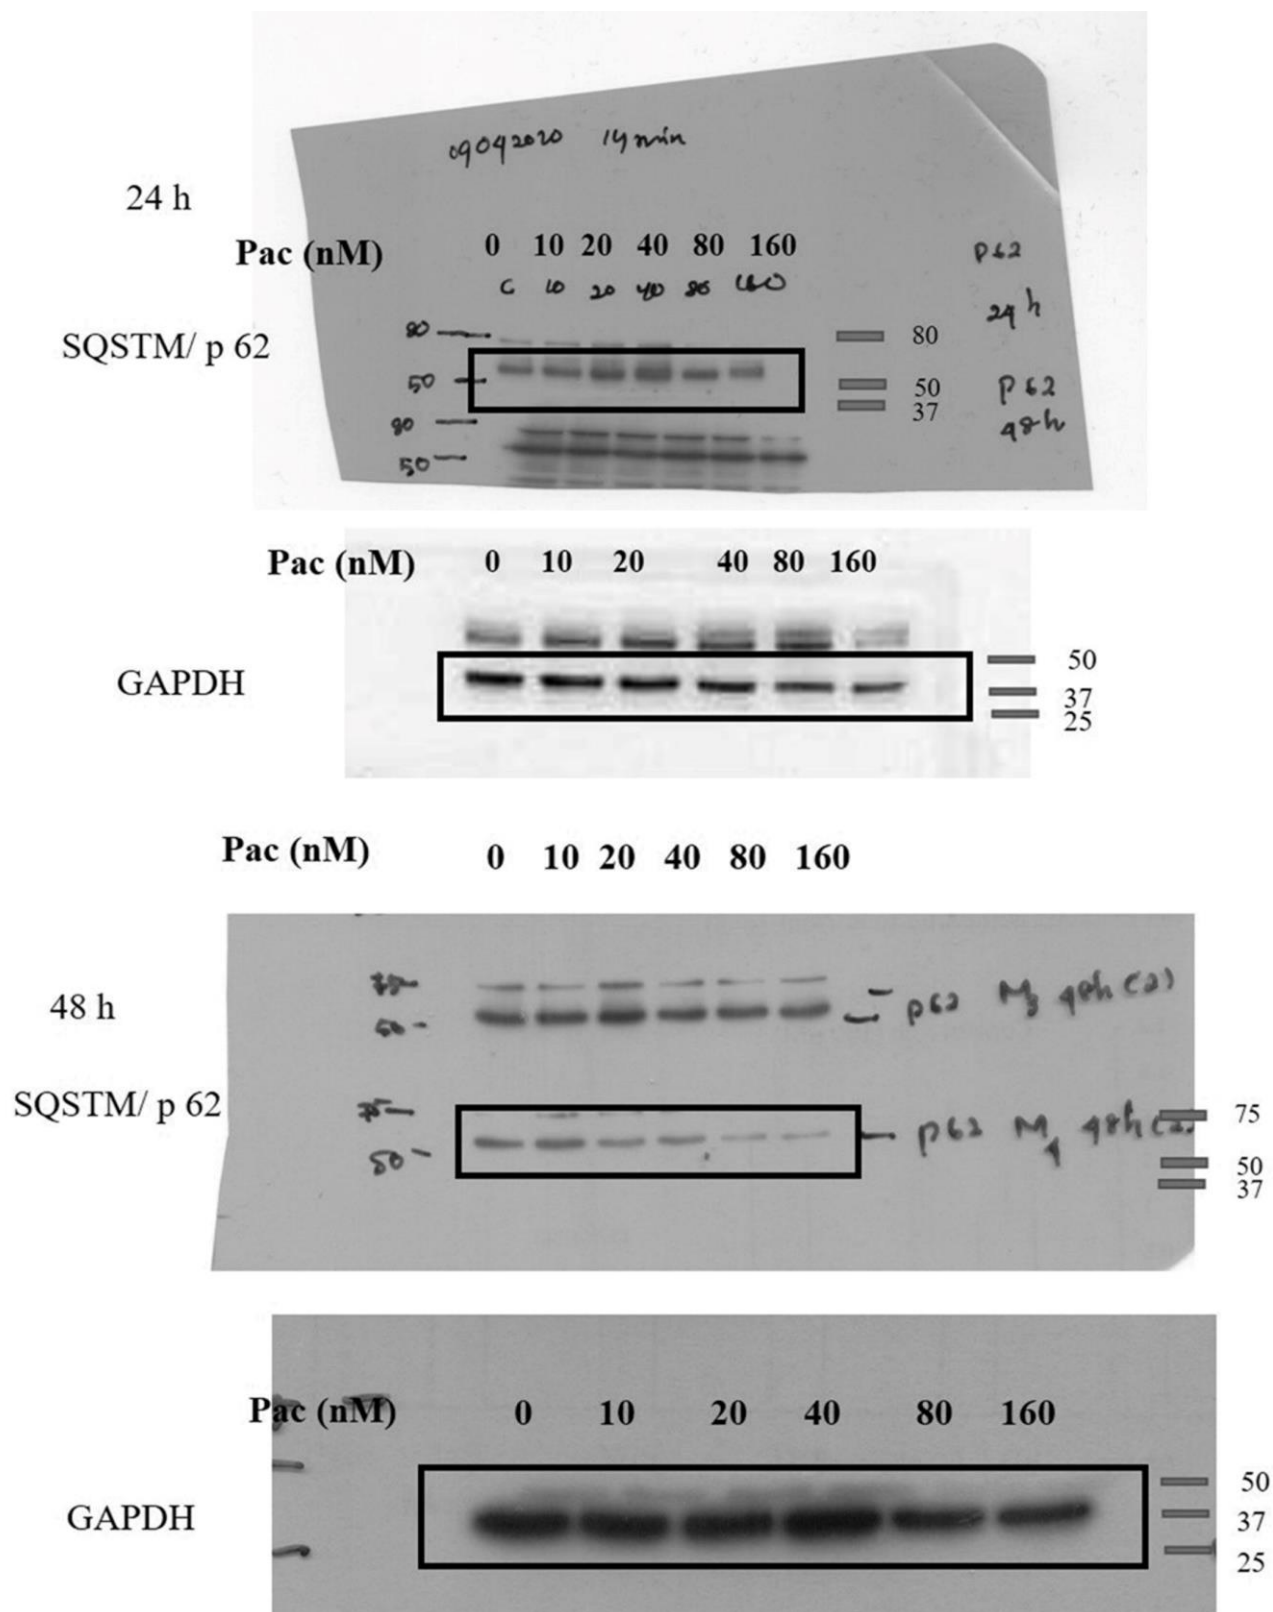

P 62

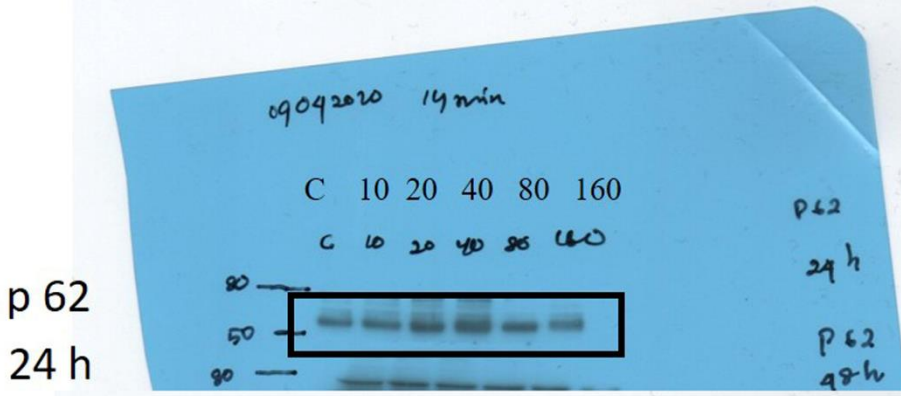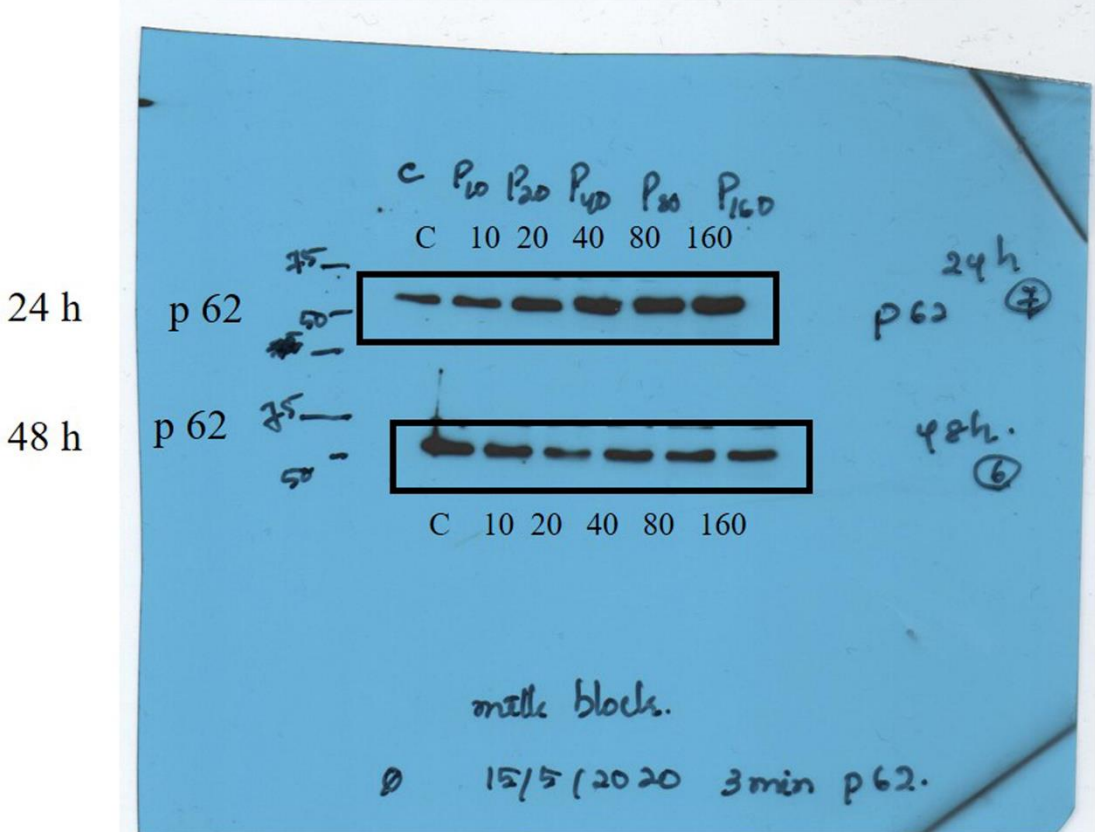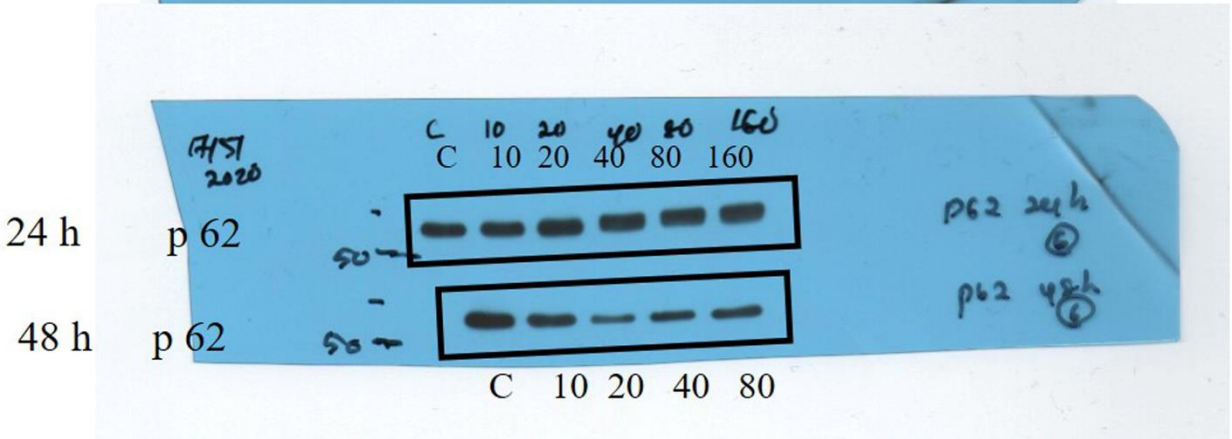



p 62

24 h

24 h

48 h

48 h

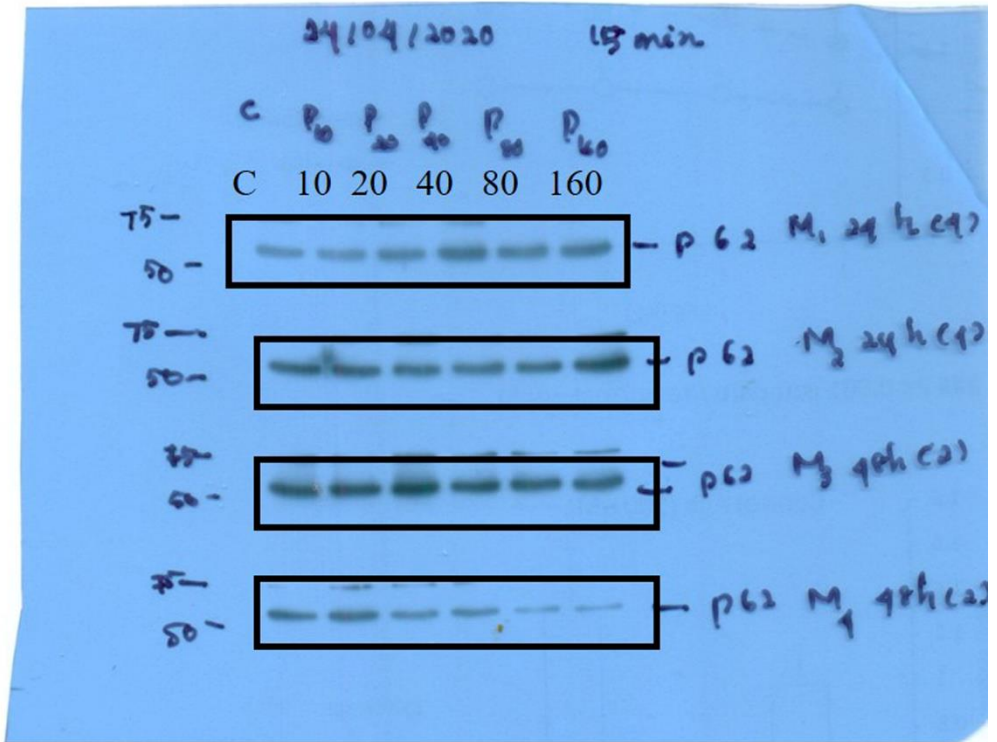

24 h p62

48 h p62

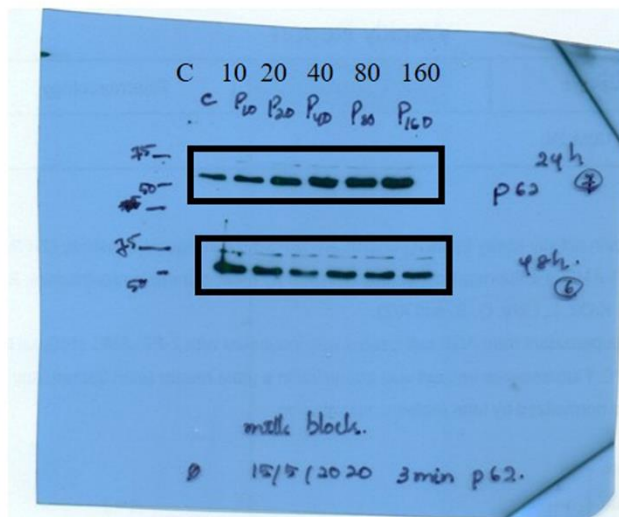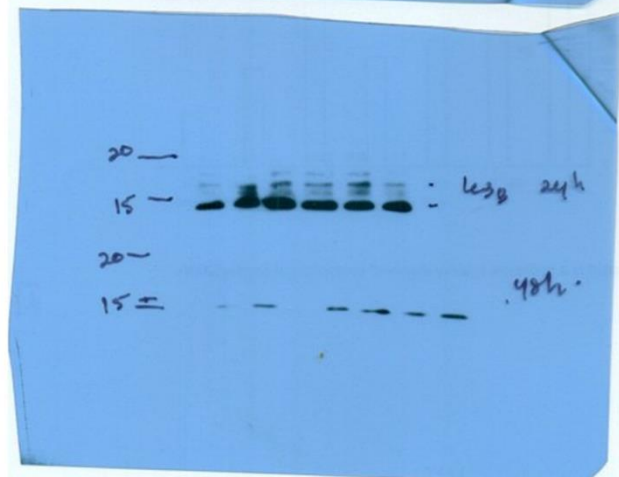

**Fig. 5f**

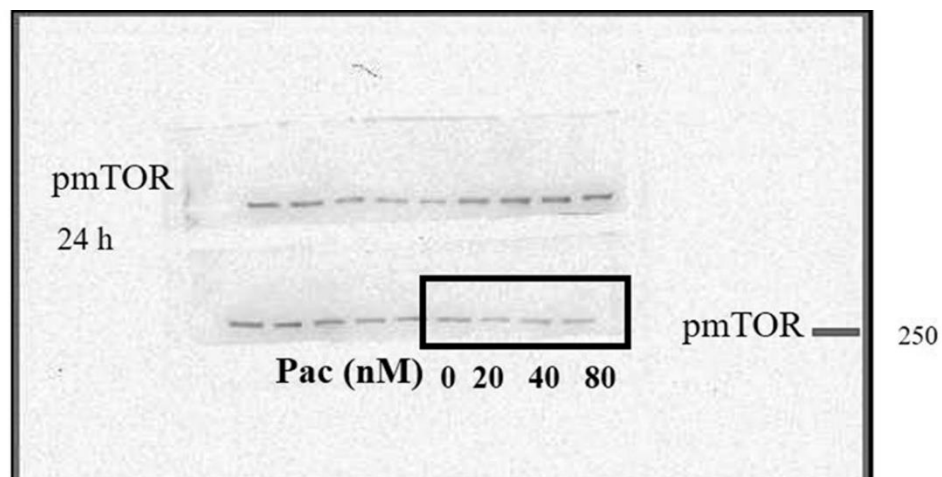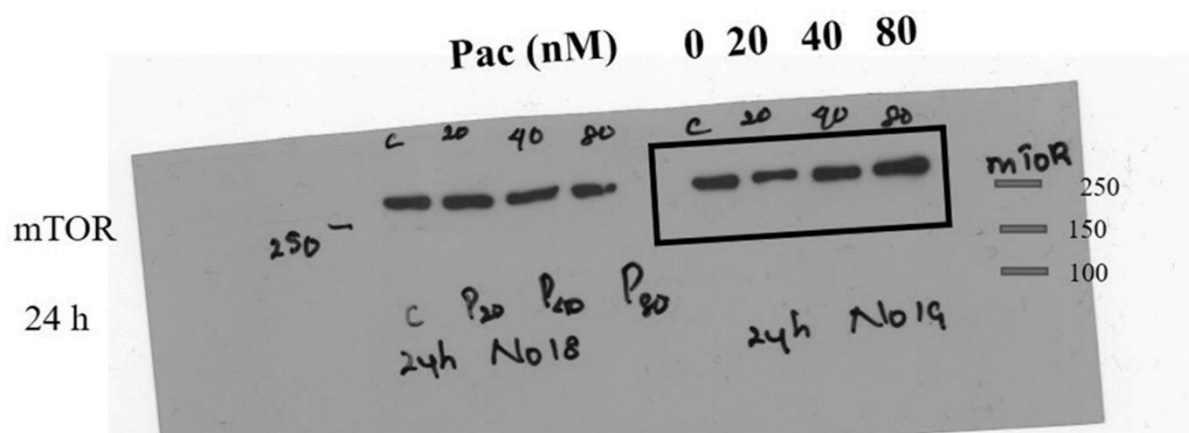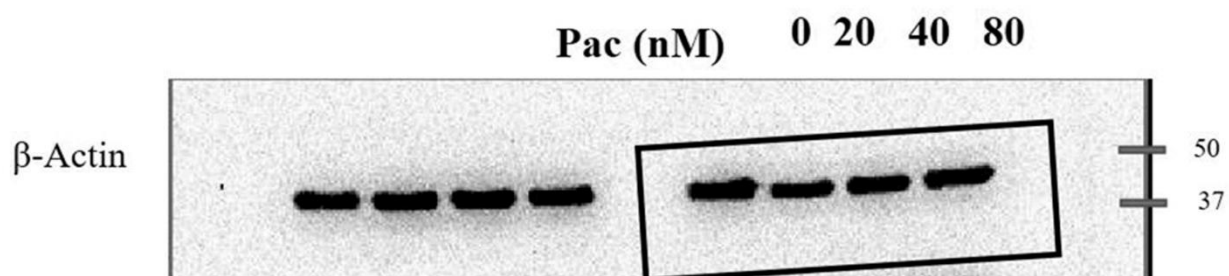

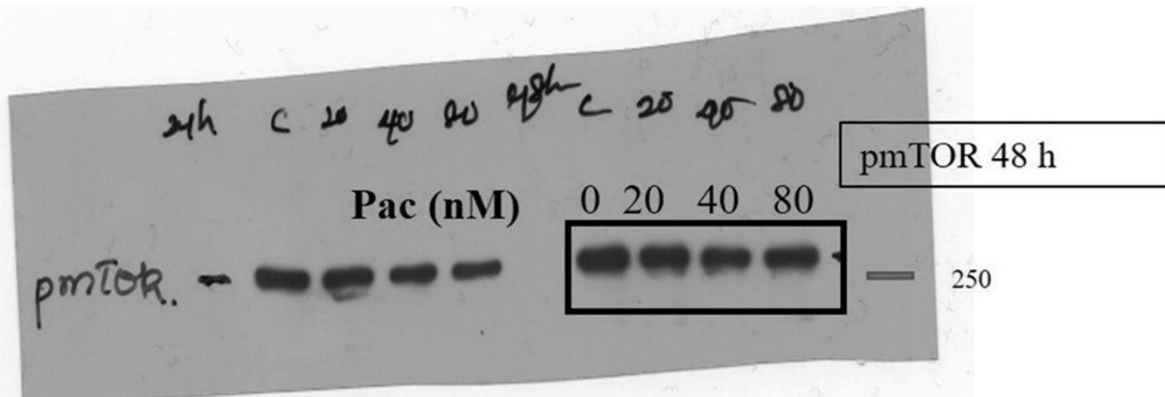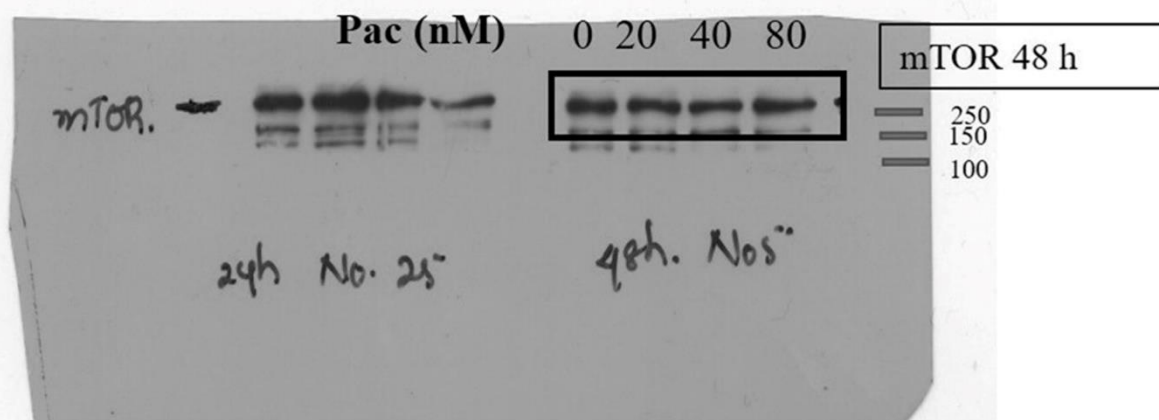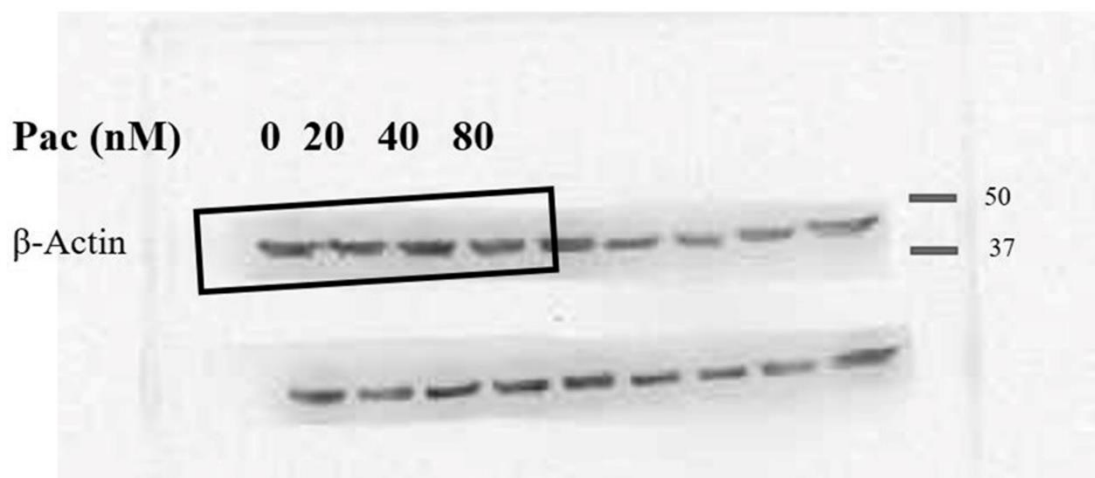

p-m TOR

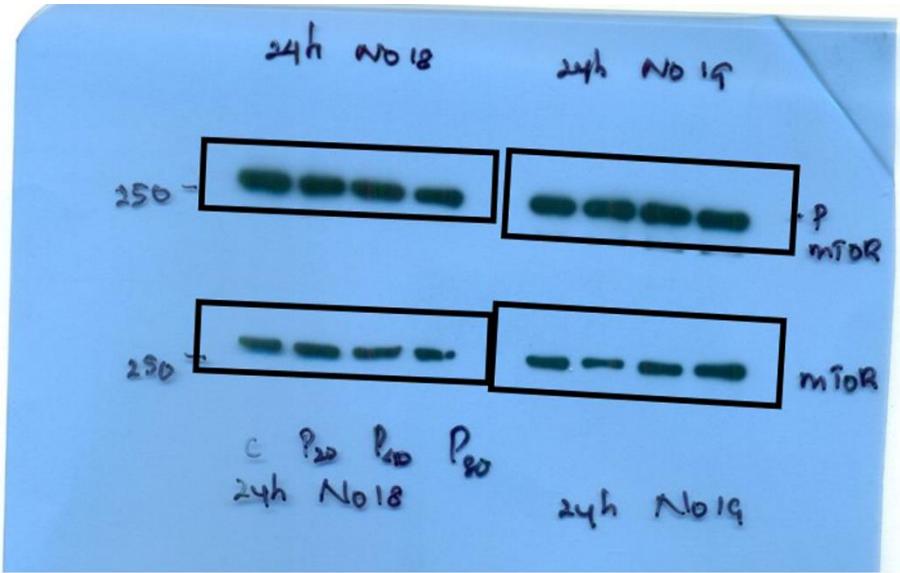

m TOR

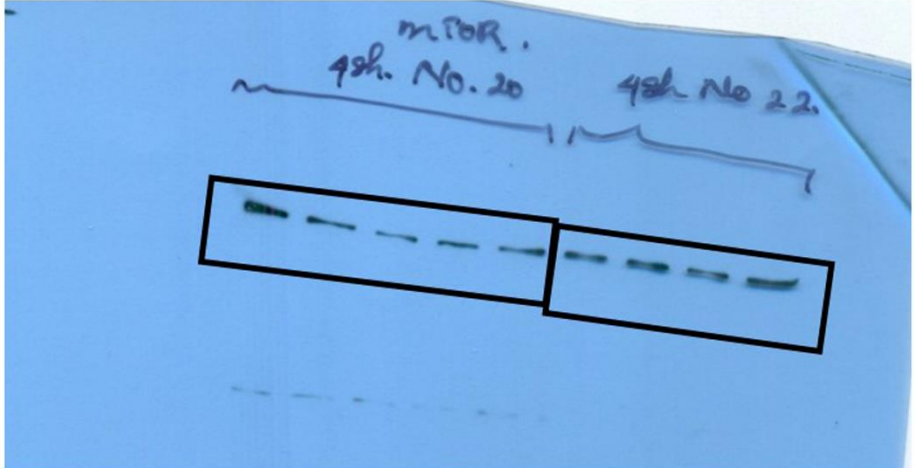

m TOR

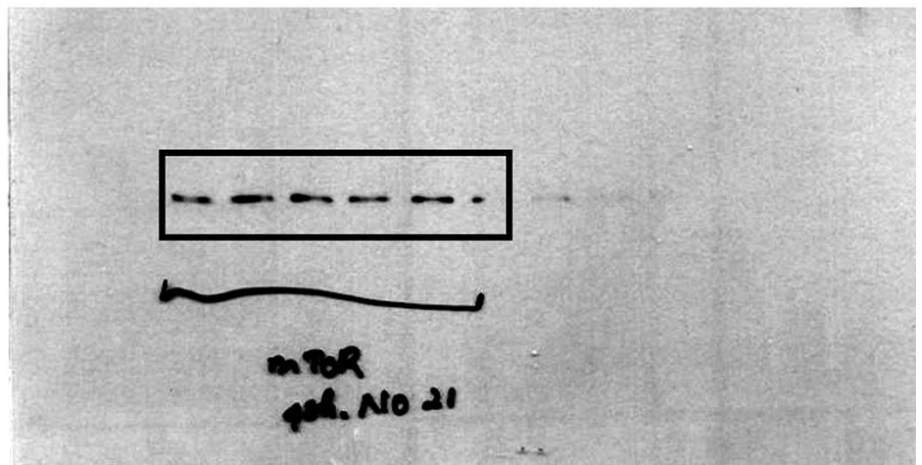

m TOR

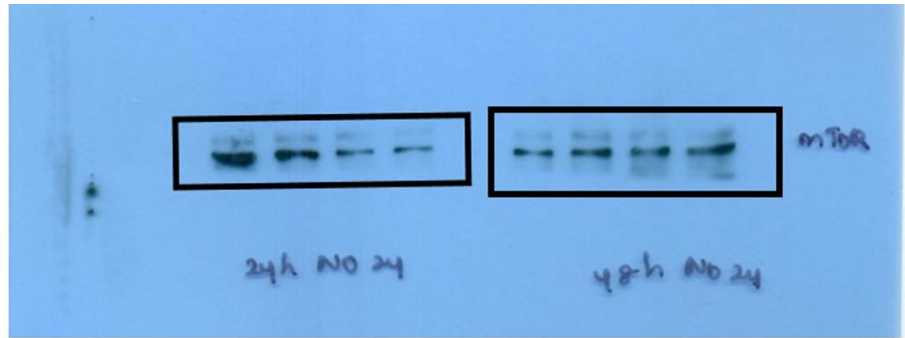

p-m TOR

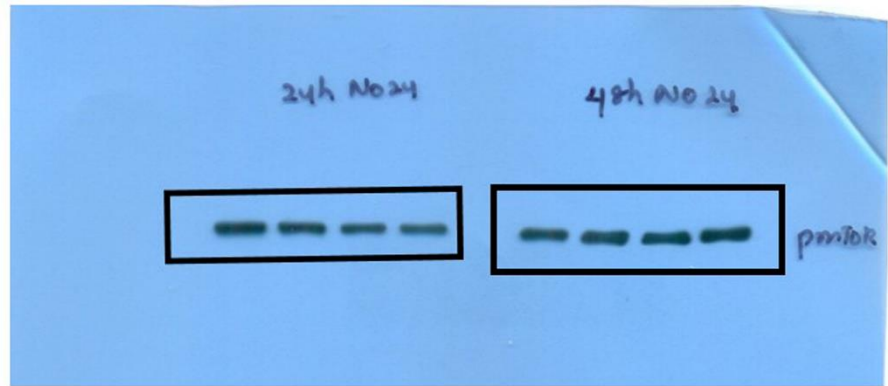

p-m TOR

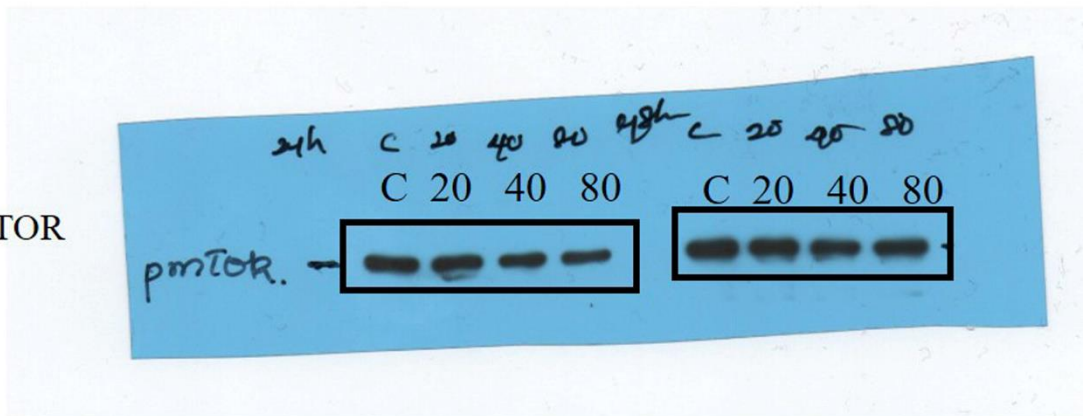

m TOR

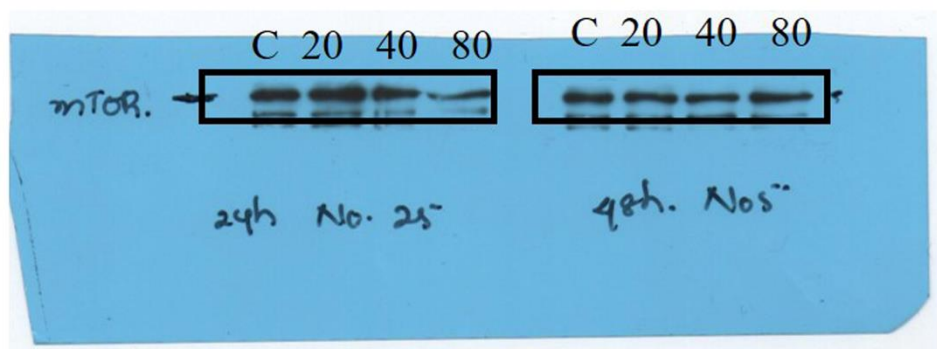

**Fig. 5g**

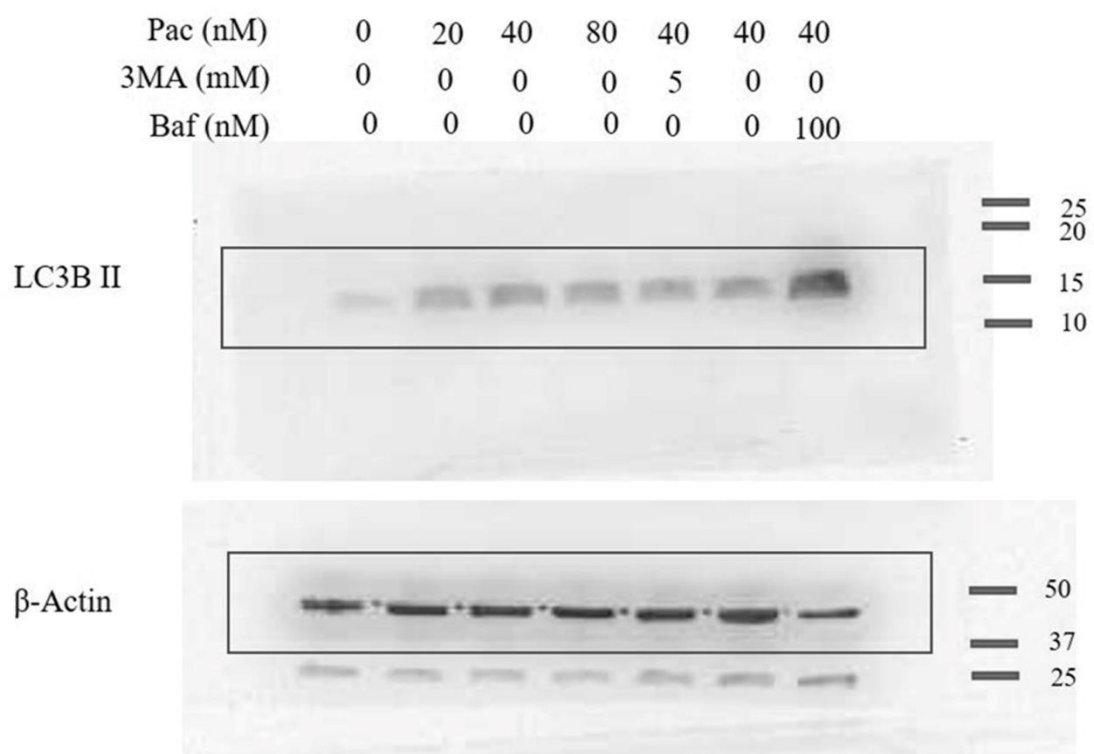

# Supporting data

Fig. FF Photographs of the replicated full-length blots described in Figure 6

**Fig. 6b**

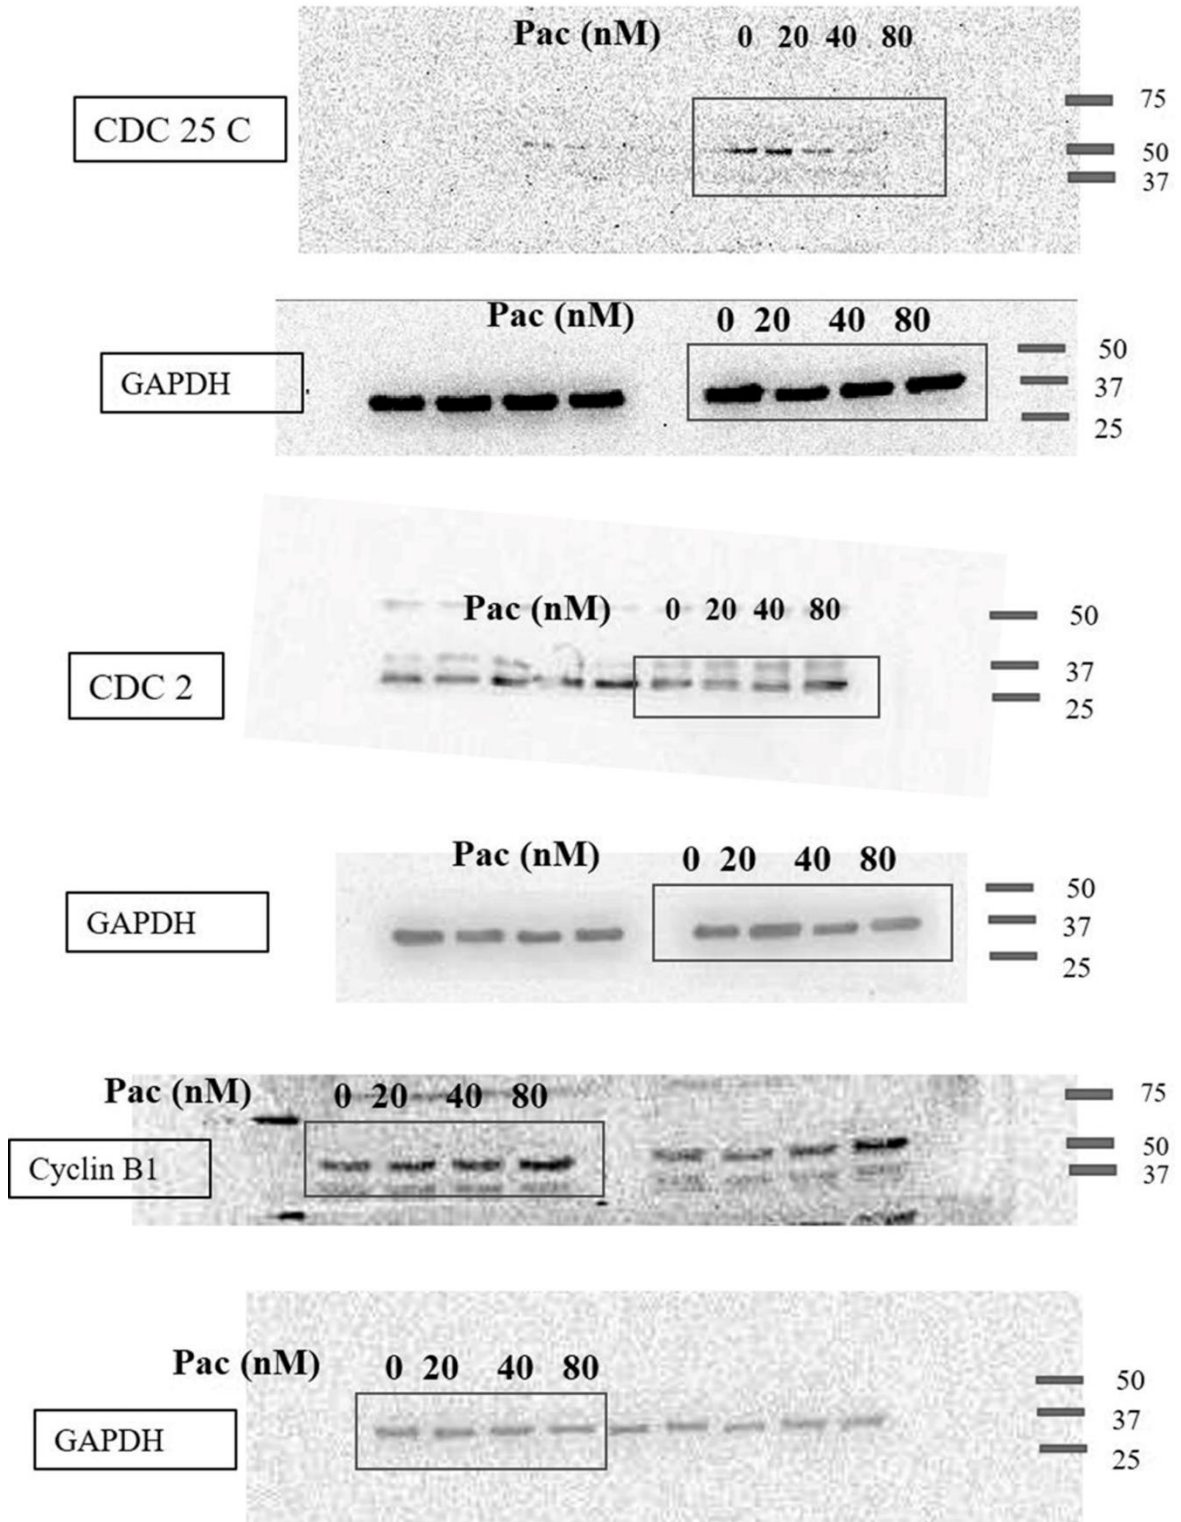

**Fig. 6d**

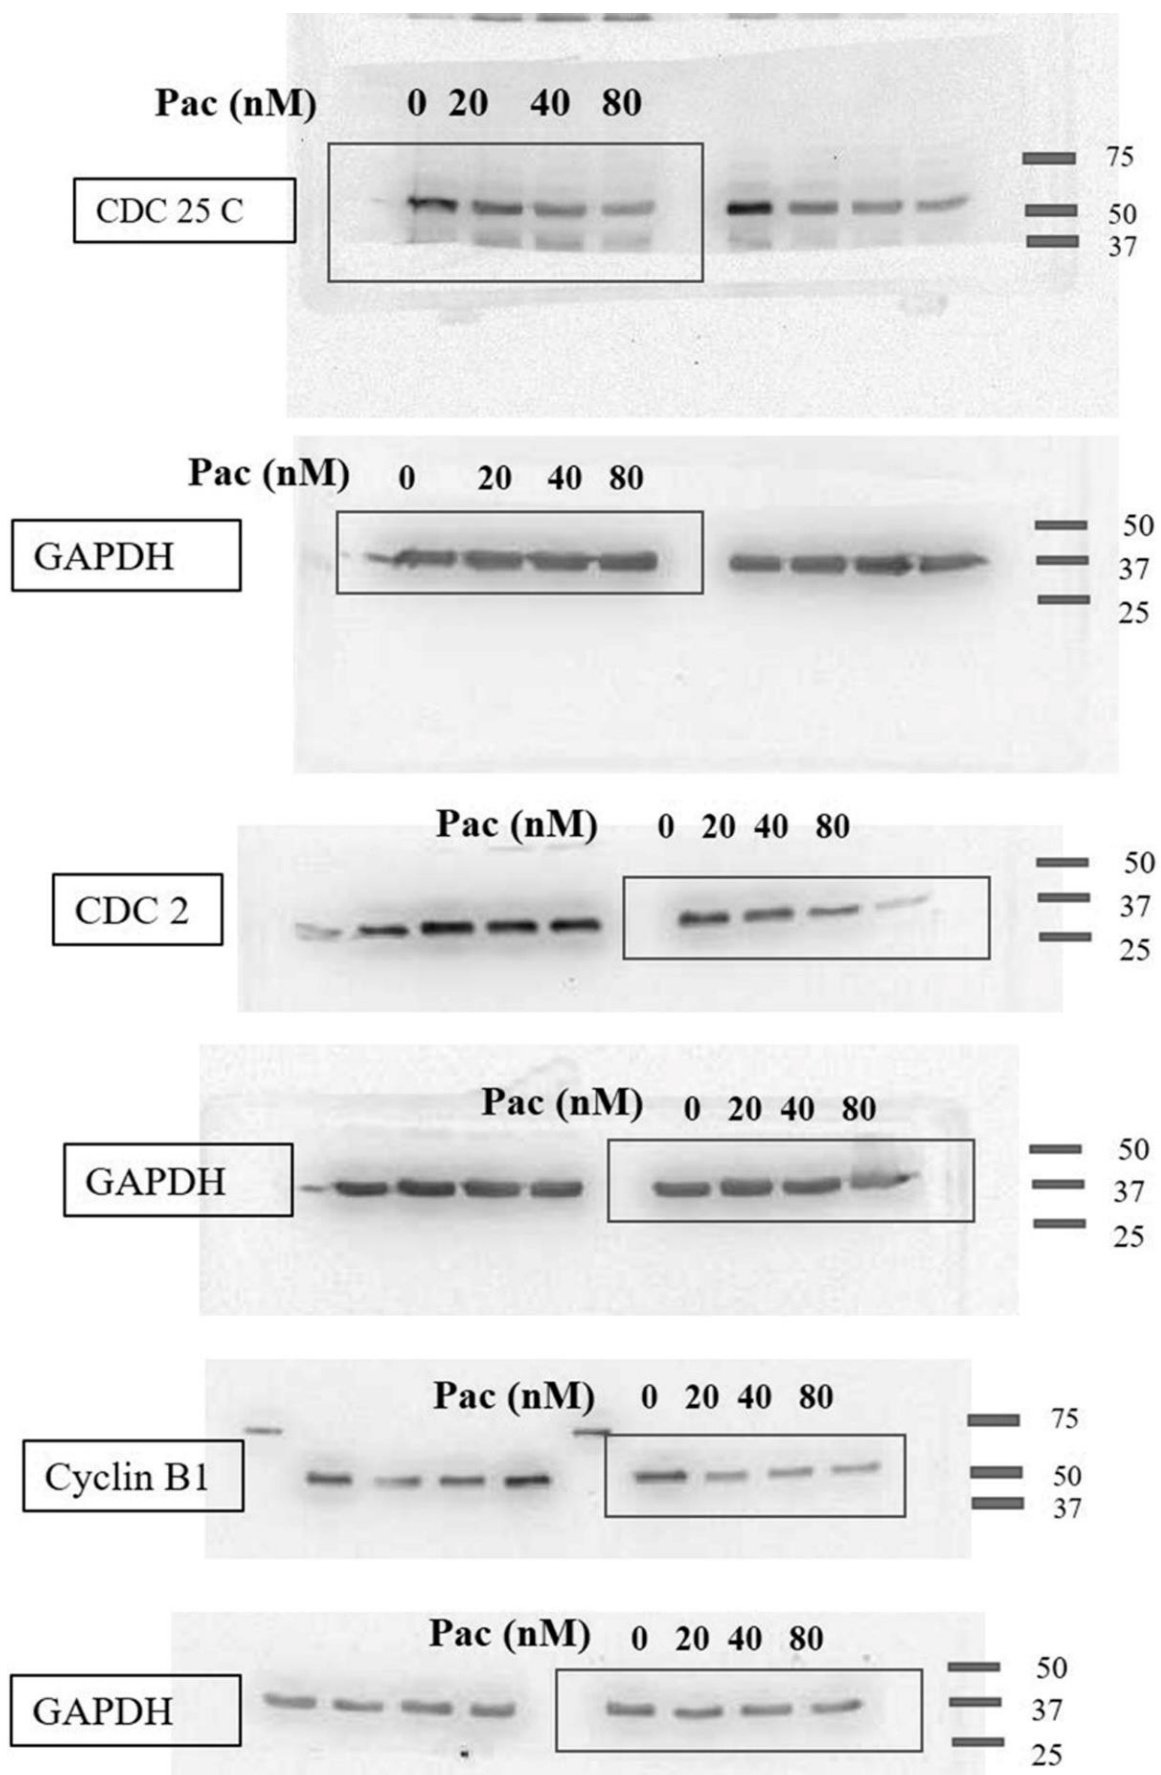



cdc25c

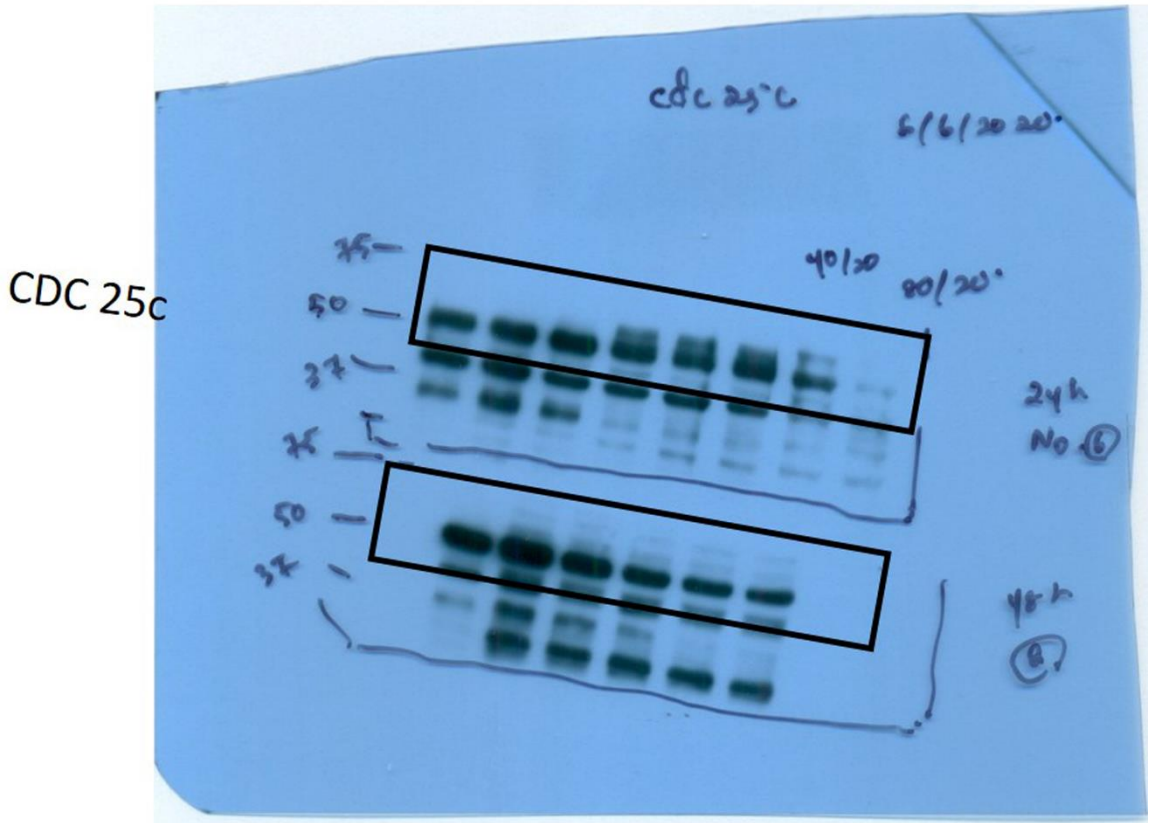

CDC 25c

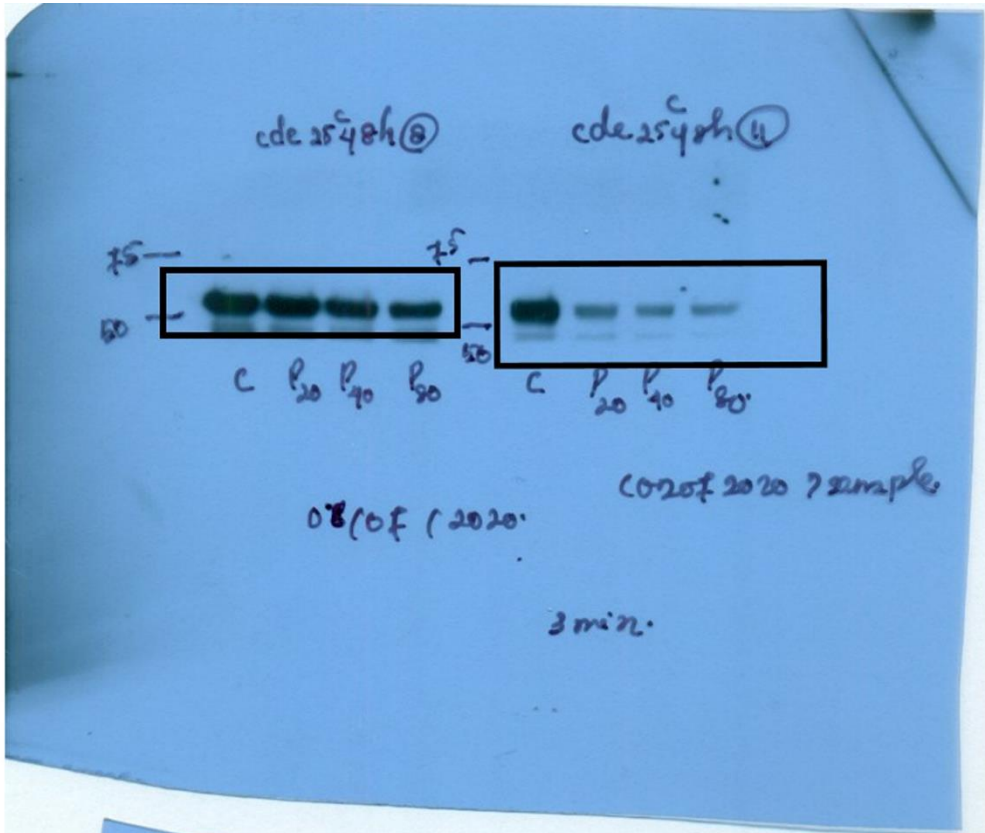

CDC 25c

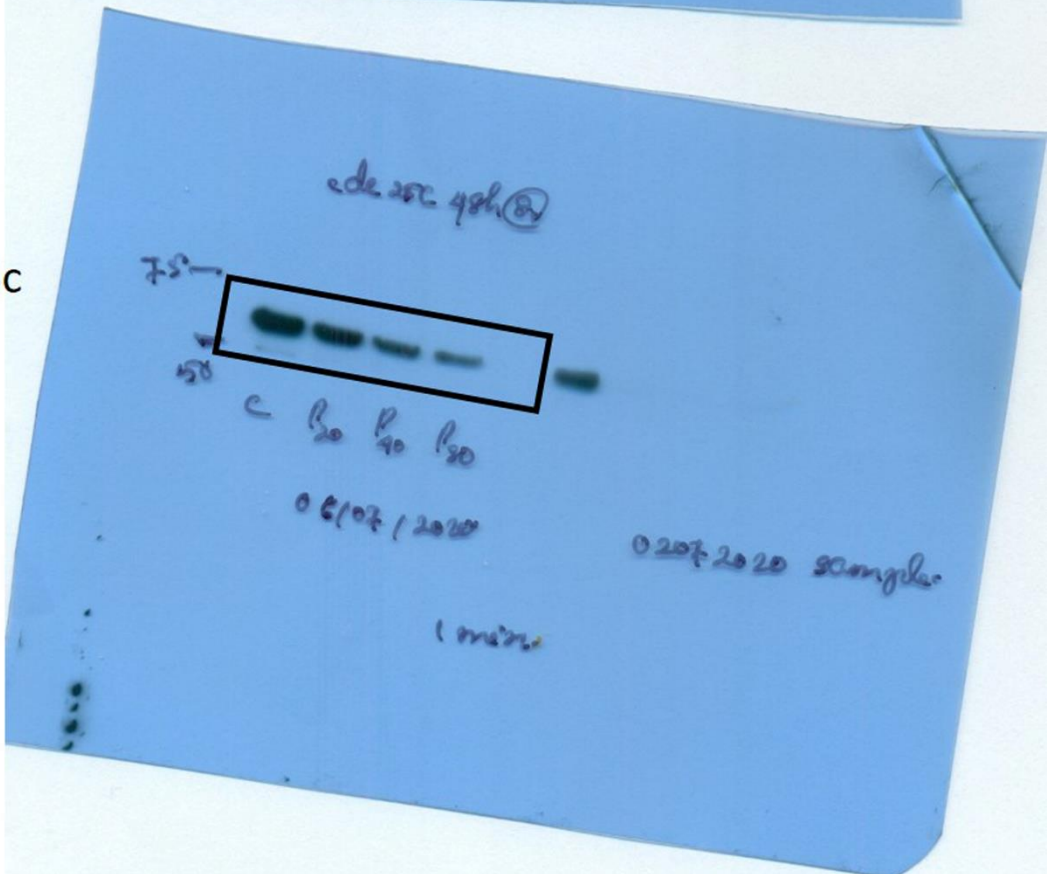

cdc25c

48 h

24 h

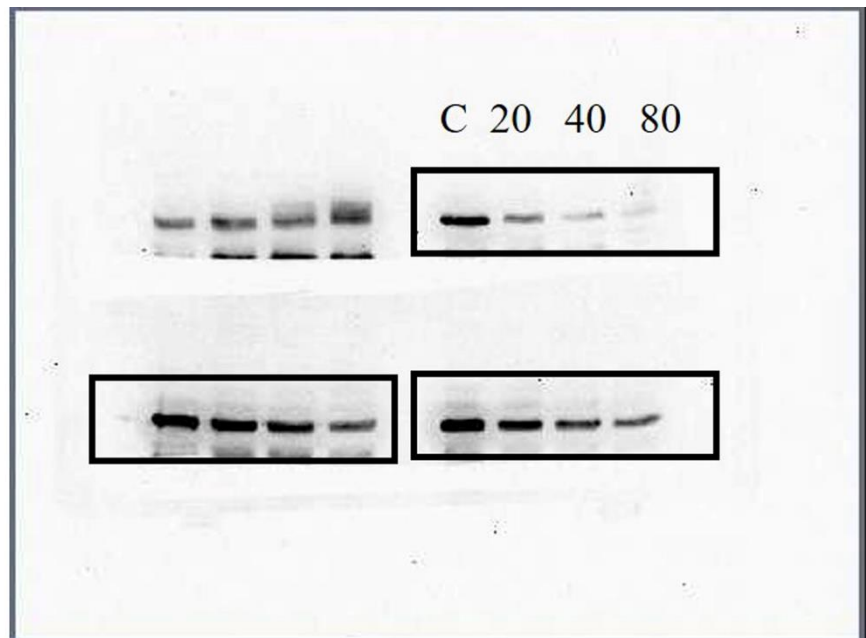

cdc25c

24 h

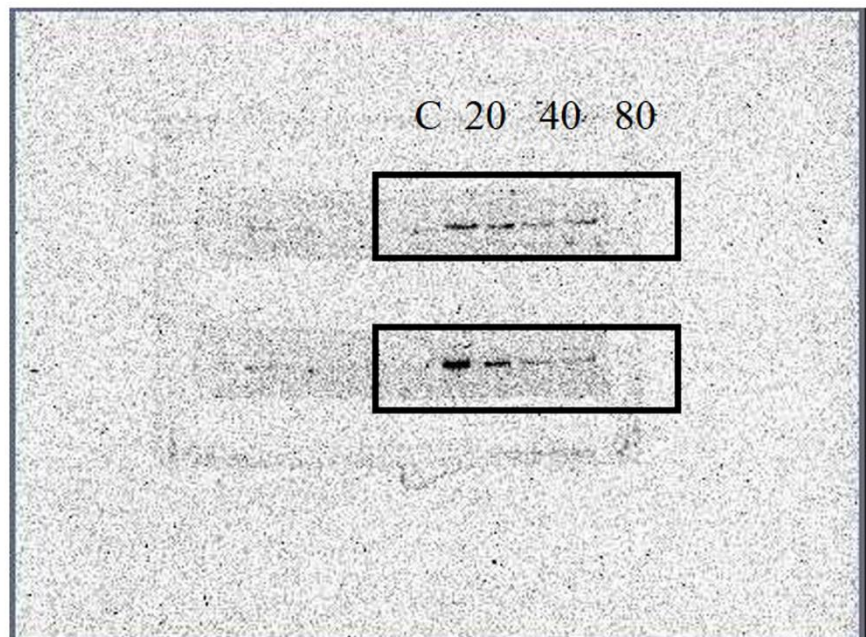

cdc-2

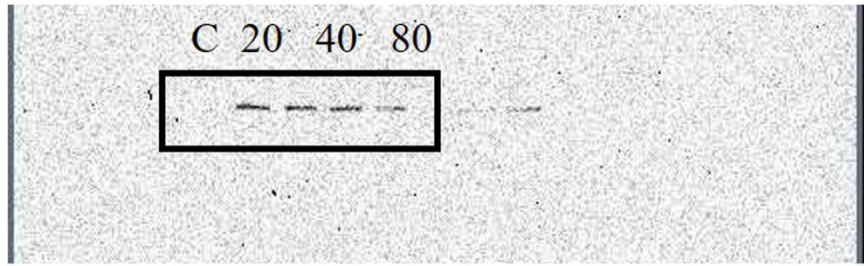

cdc-2

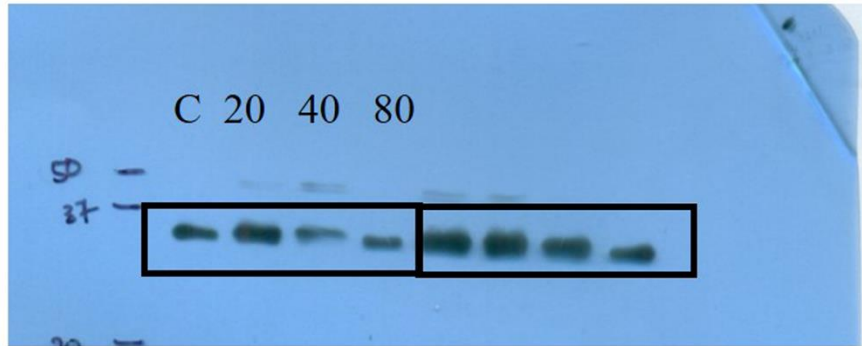

GAPDH

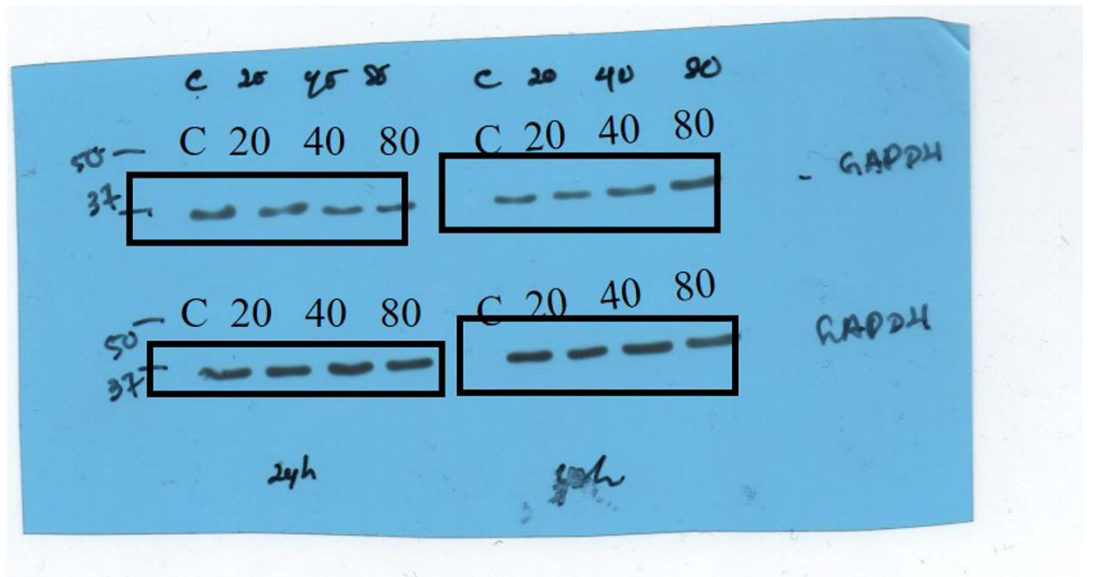

Cyclin b1

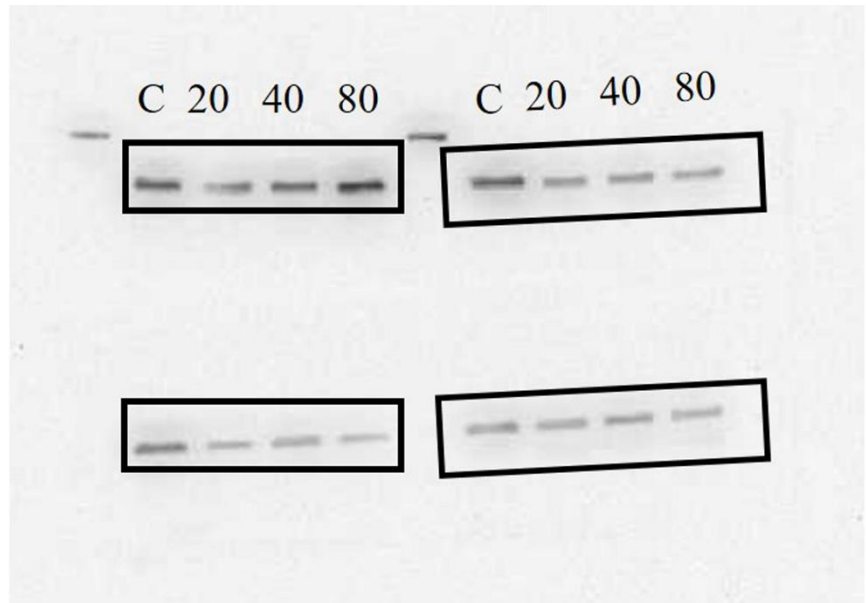

Cyclin b1

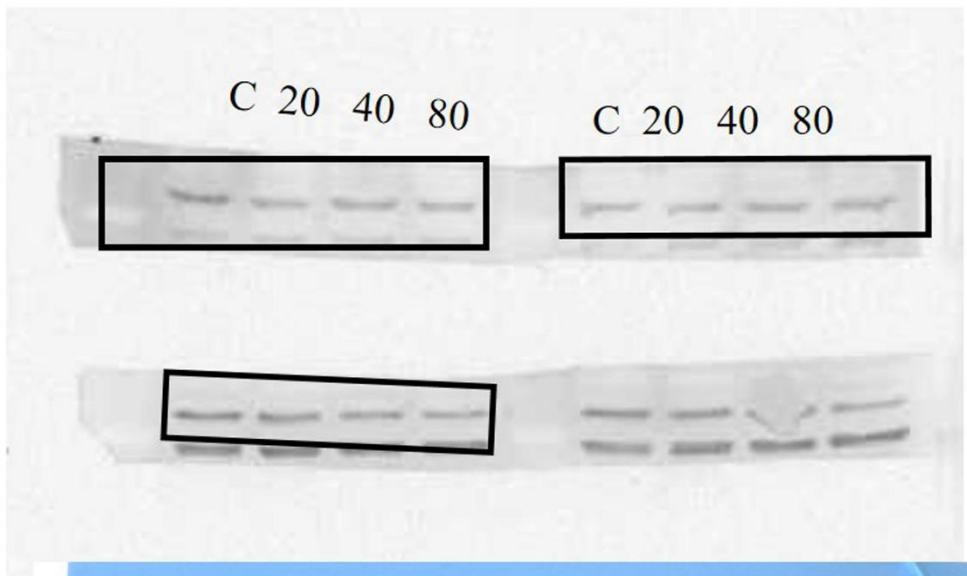

GAPDH

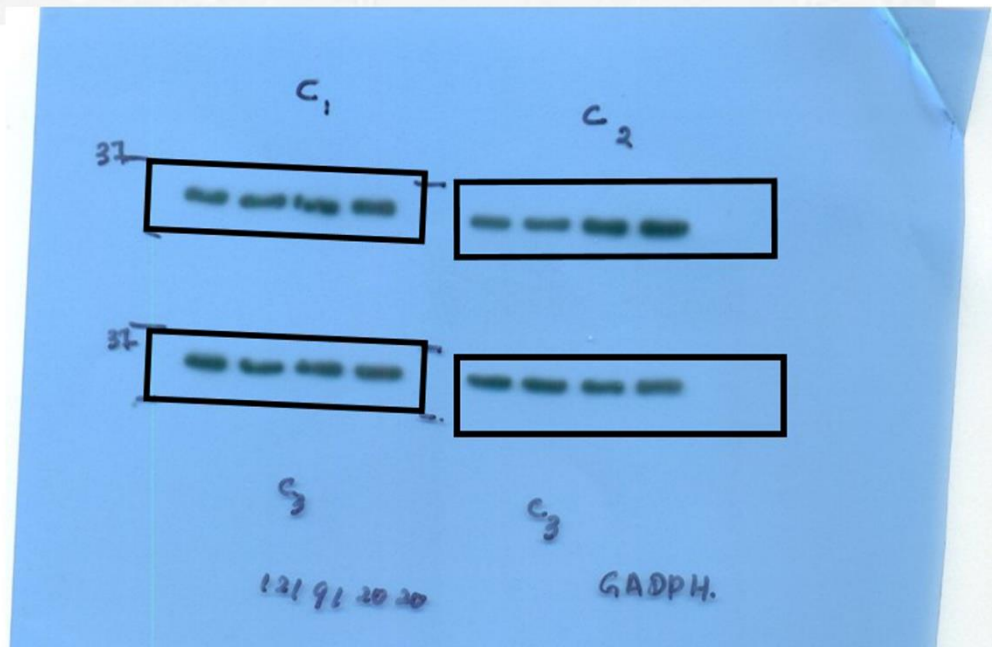

**Fig. 7f**

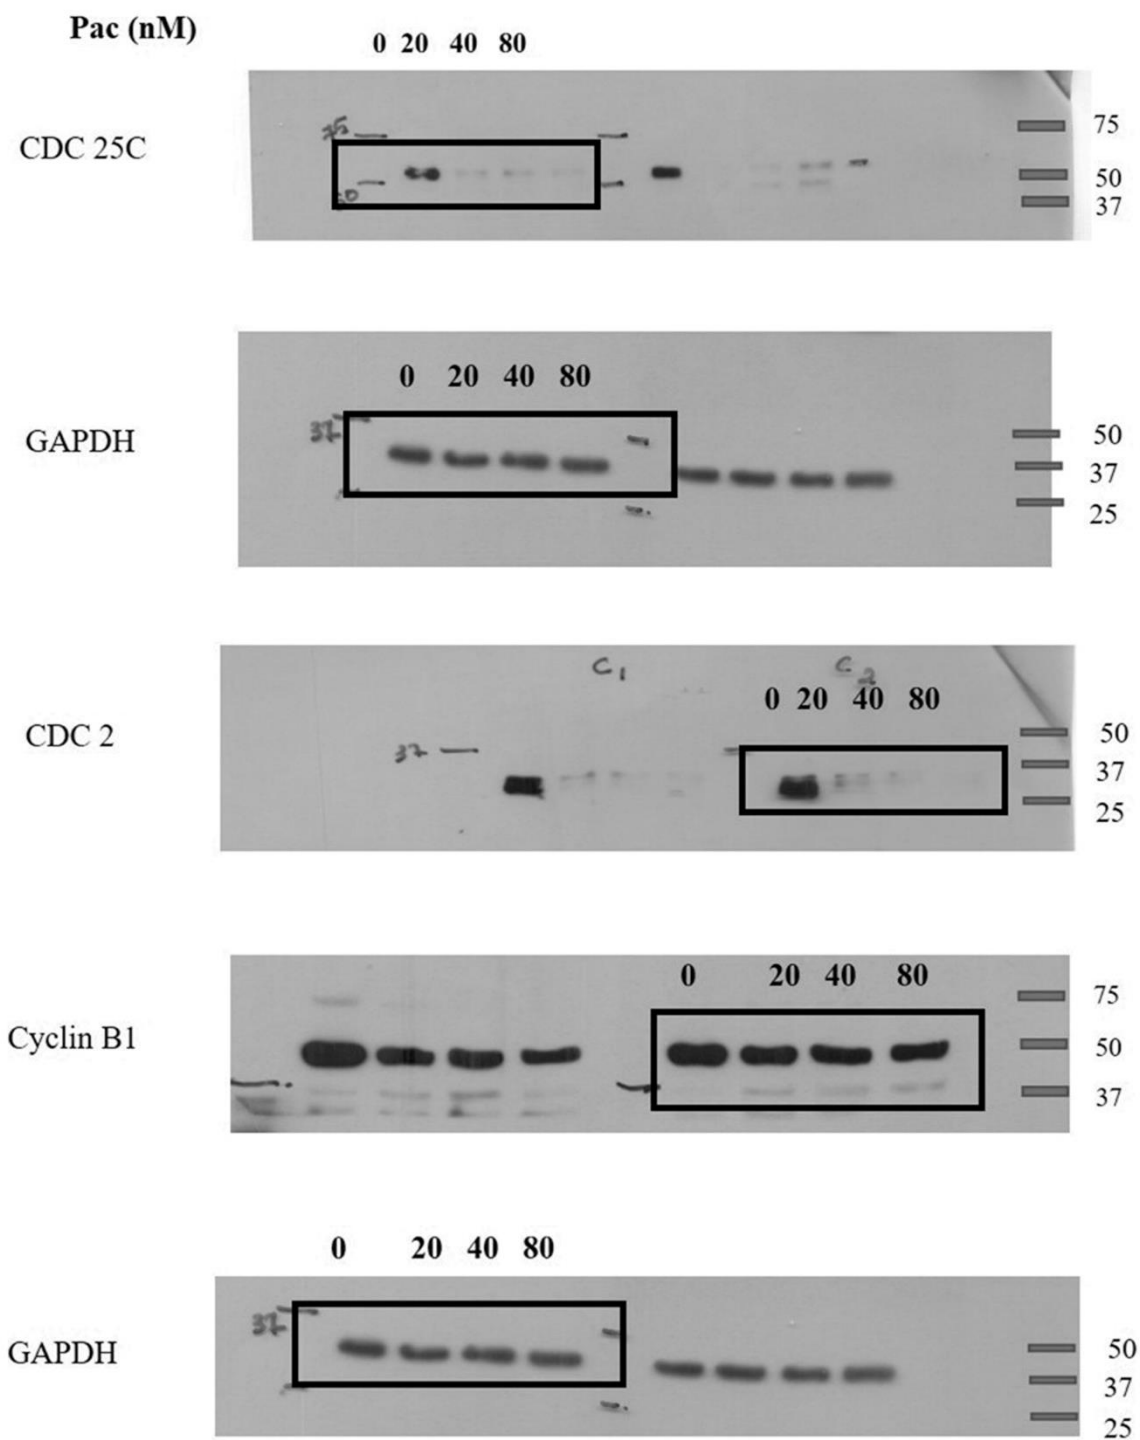

CDC 25c

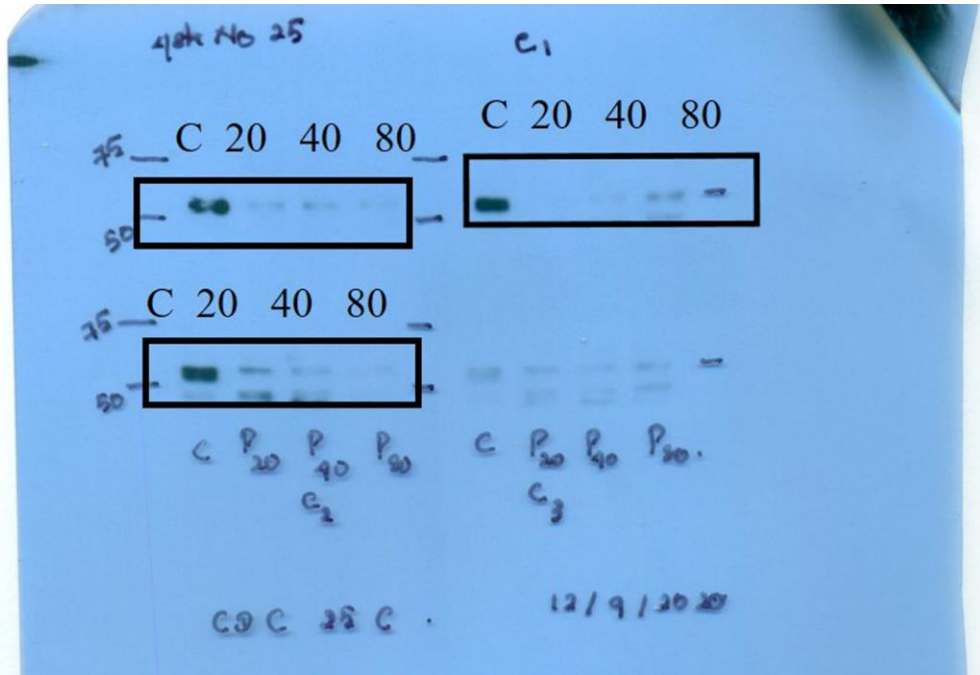

cdc 2

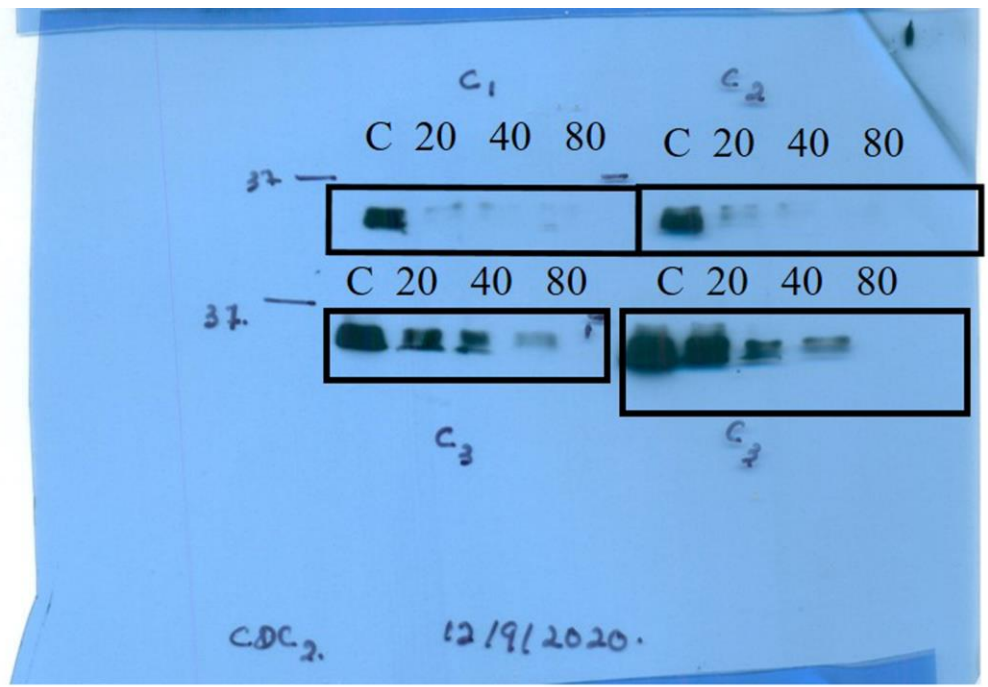

cdc 2

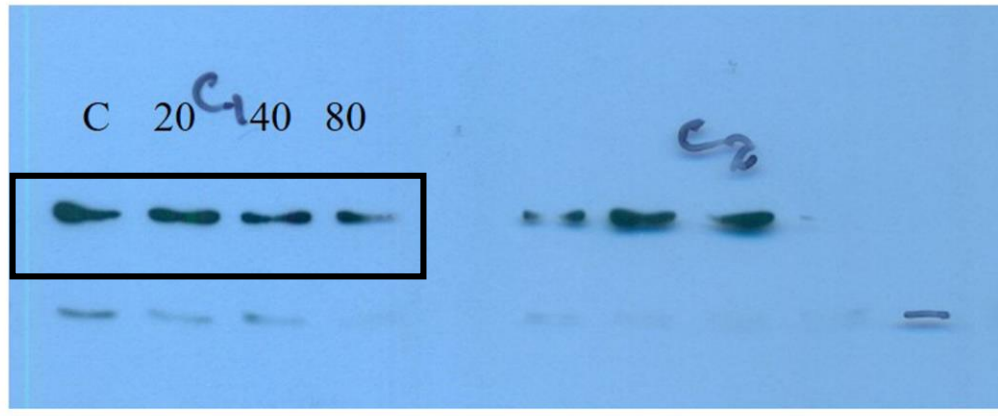

GAPDH

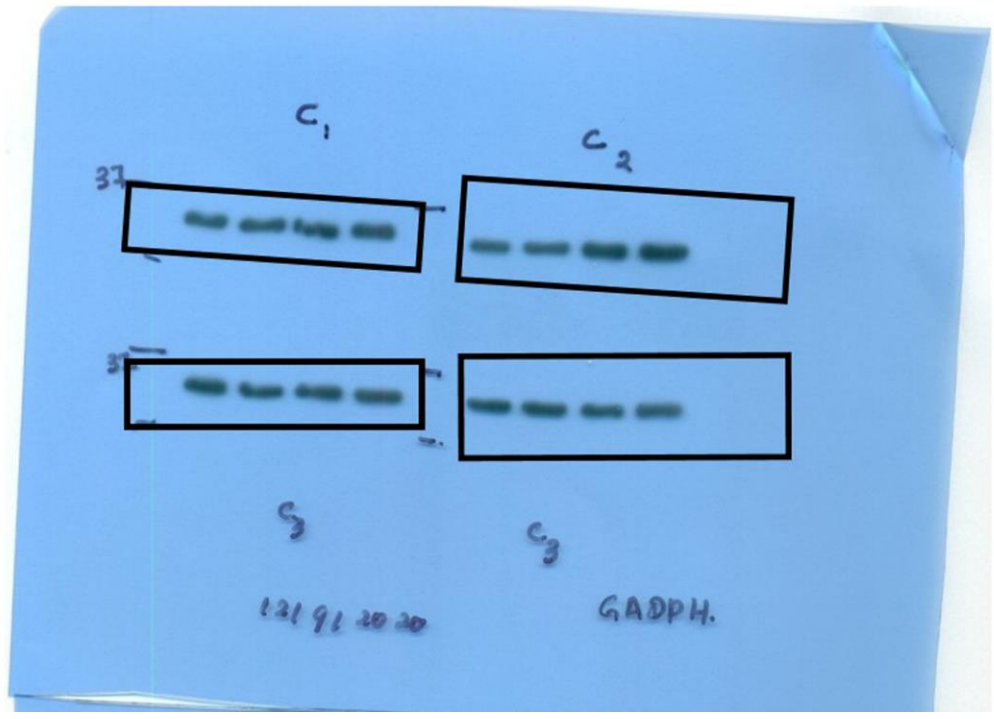



Cyclin b1

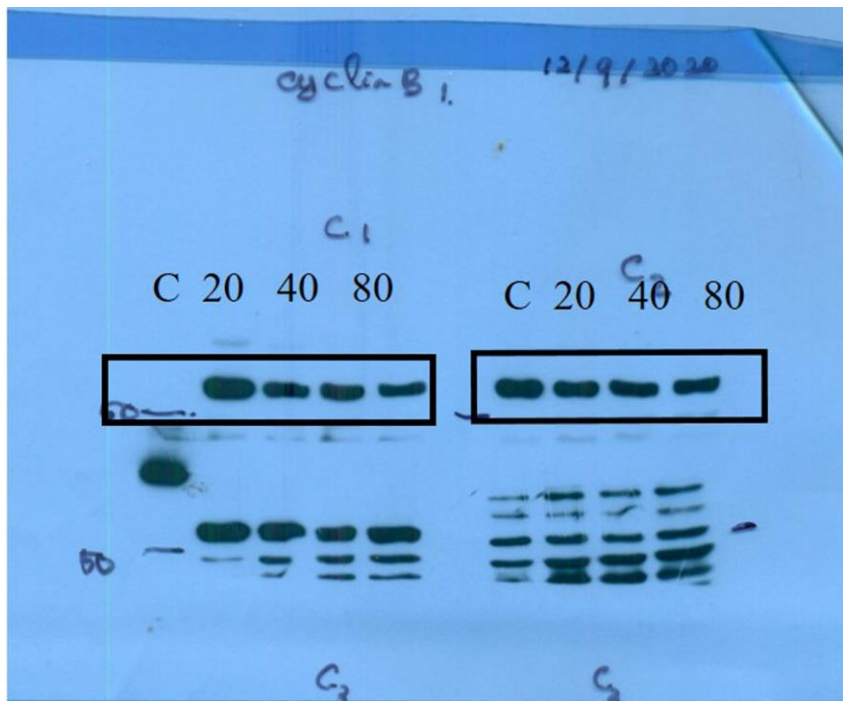

GAPDH

GAPDH

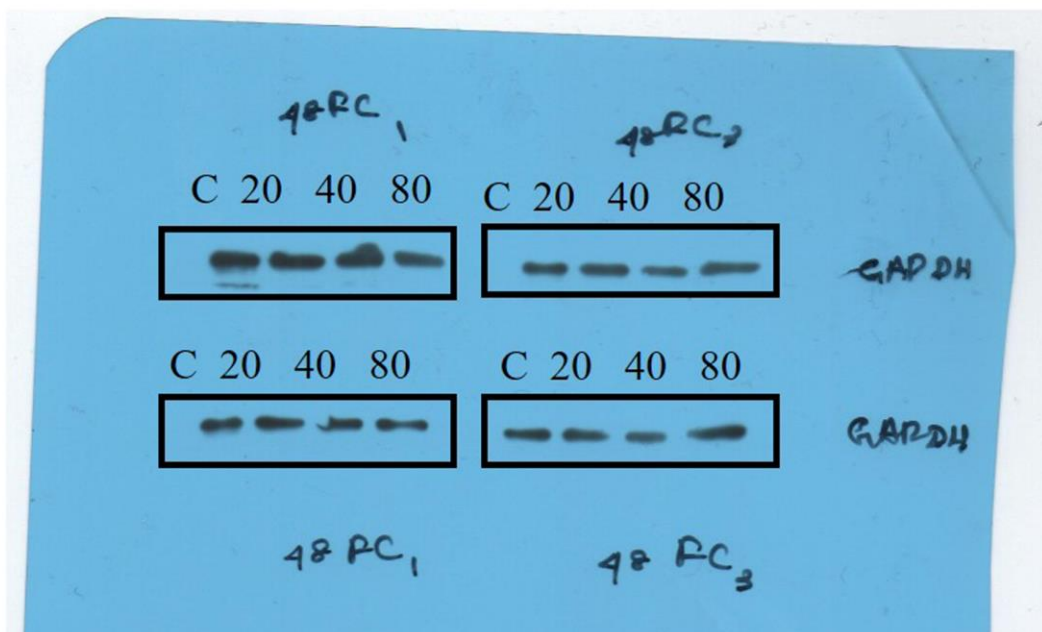

# Supplementary Fig. G

Fig. G Photographs of the full-length blots utilized in Figure 7

**Fig. 7g**

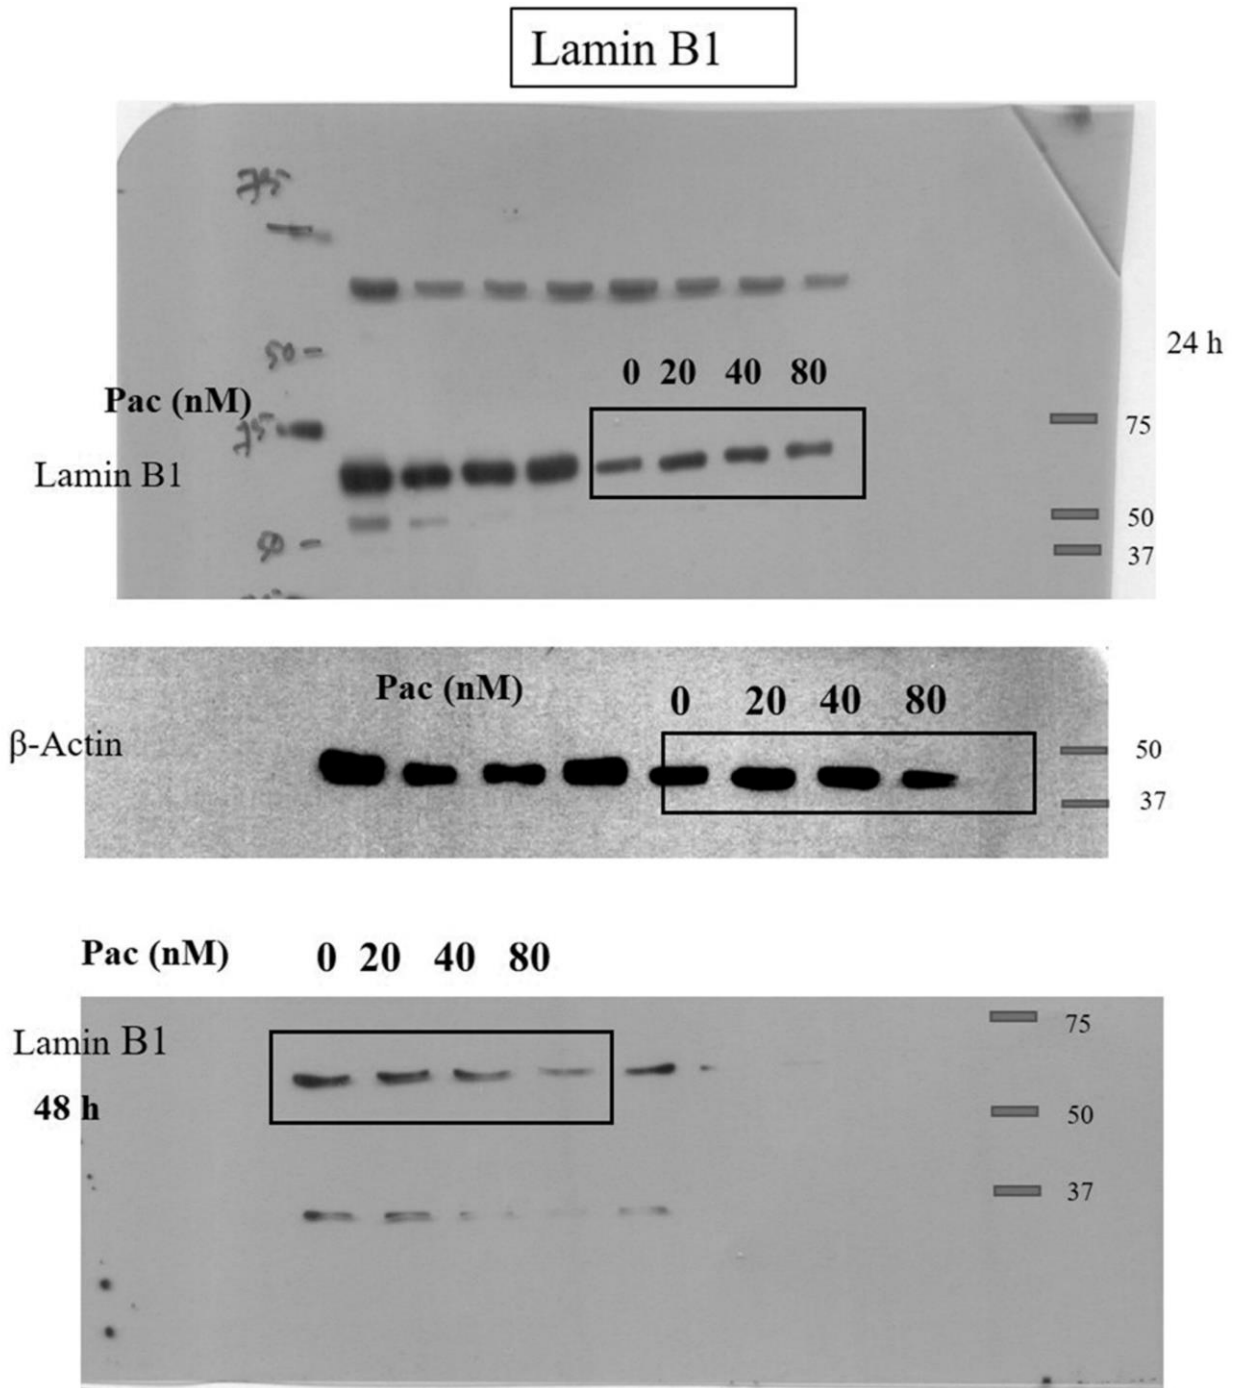

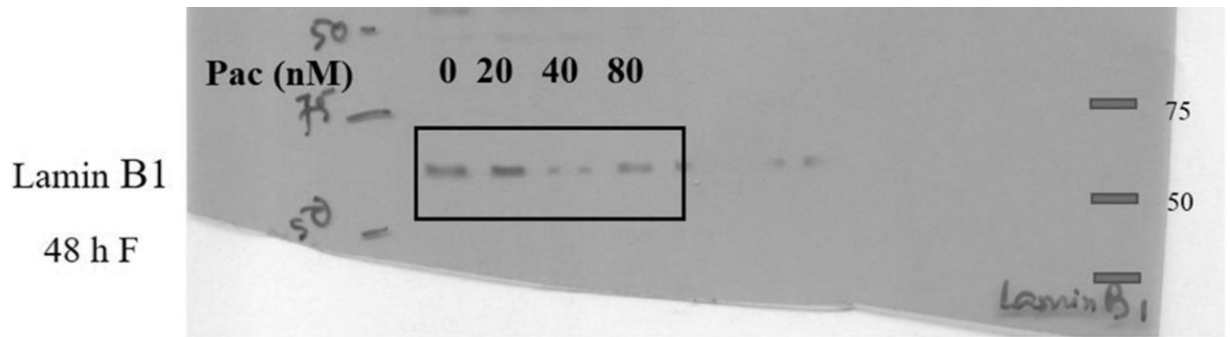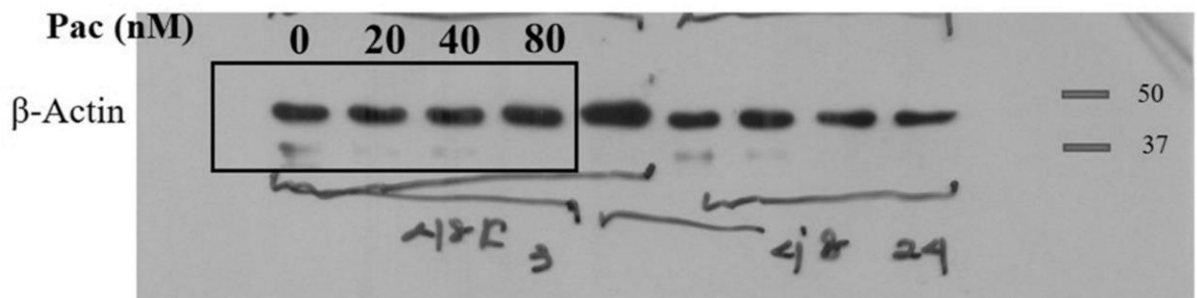

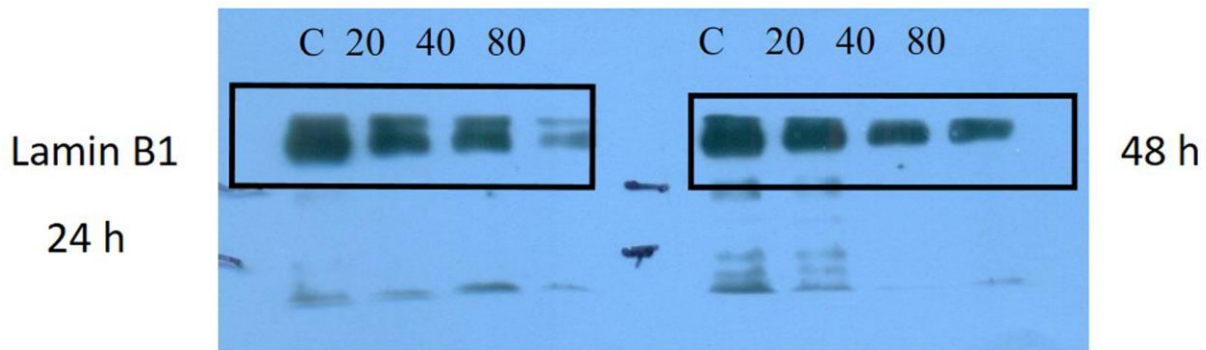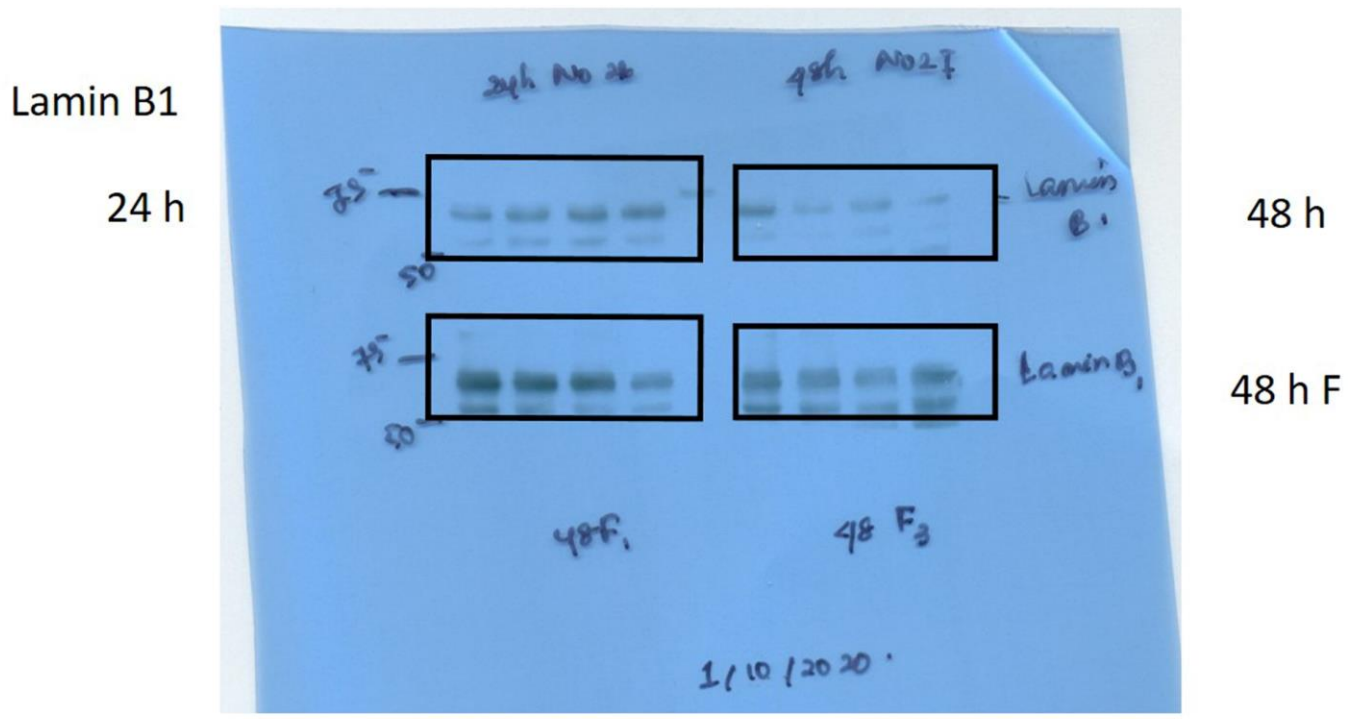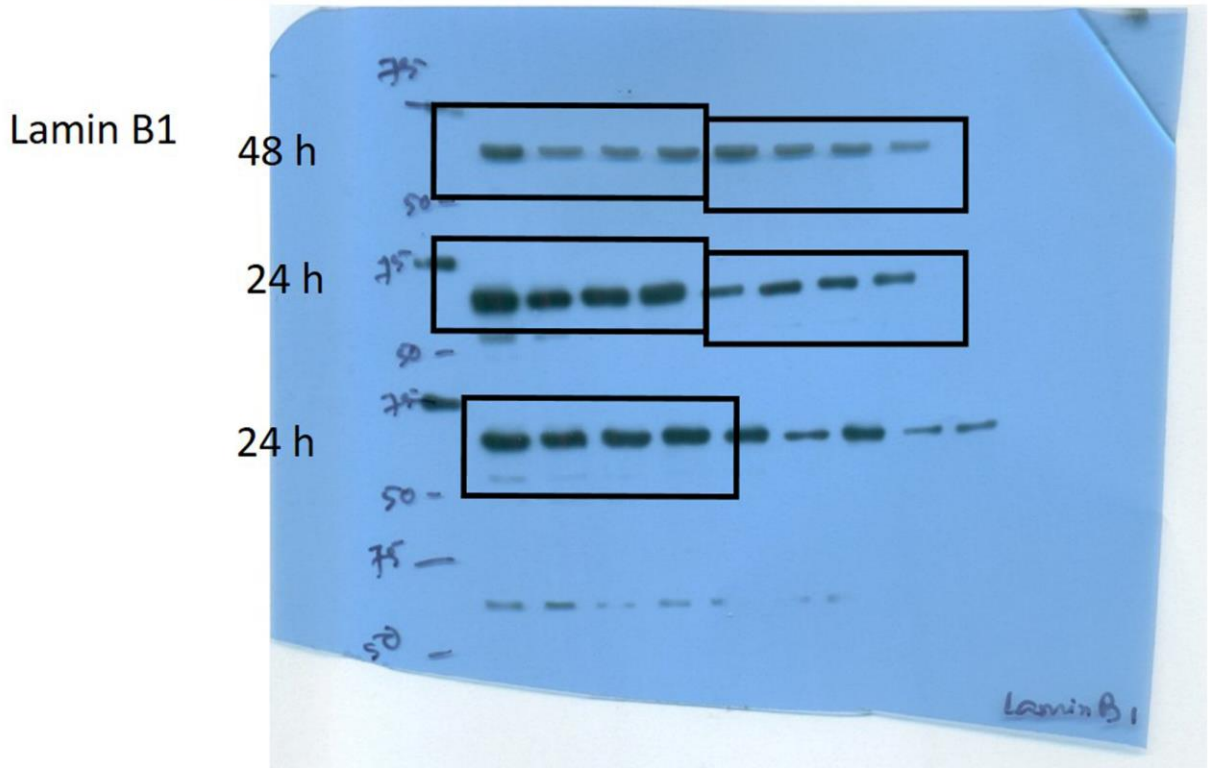

**Fig. 7h**

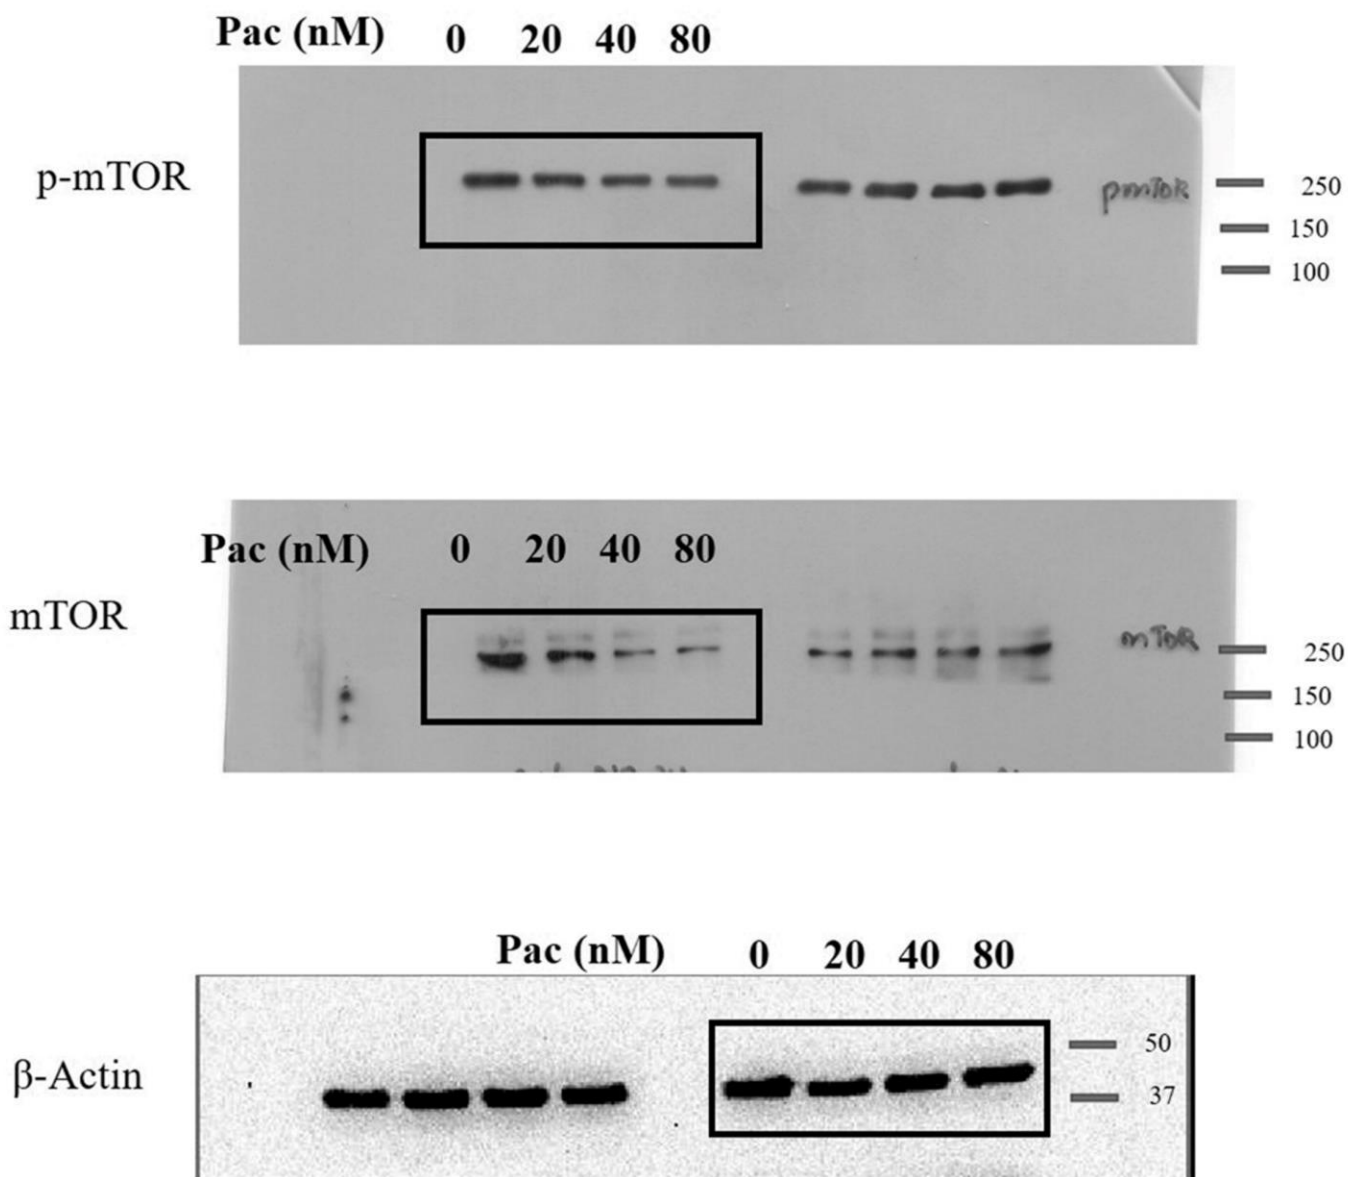

mTOR/ pmTOR

Figure. 7h

mTOR  
48 Followed  
by 24 h

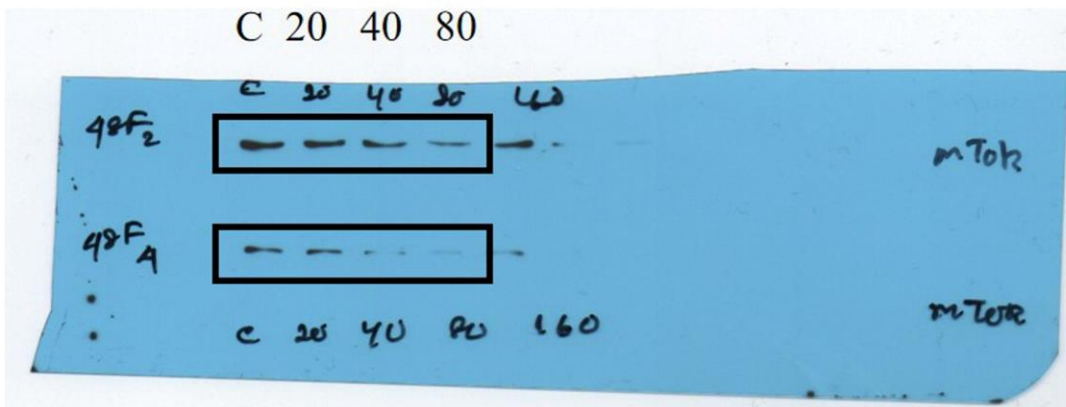

P-mTOR  
48 Followed  
by 24 h

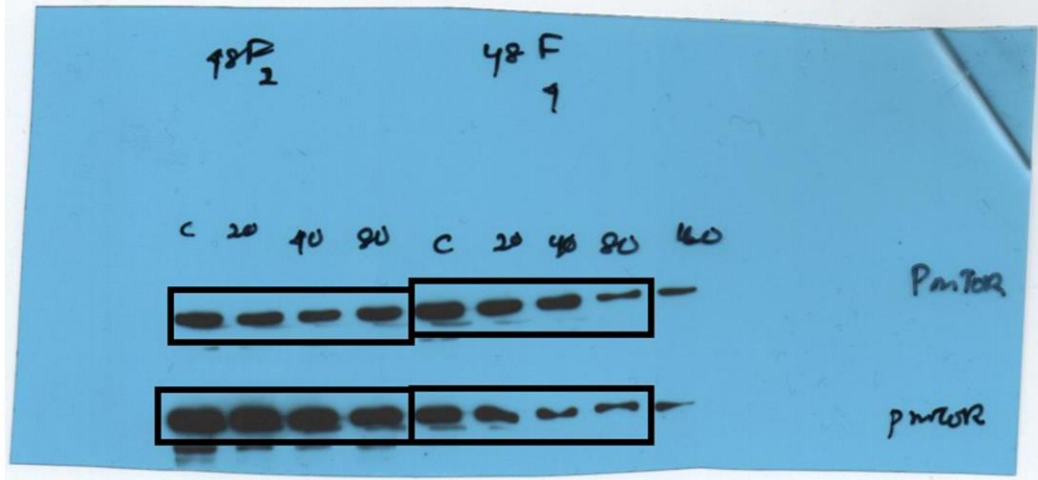

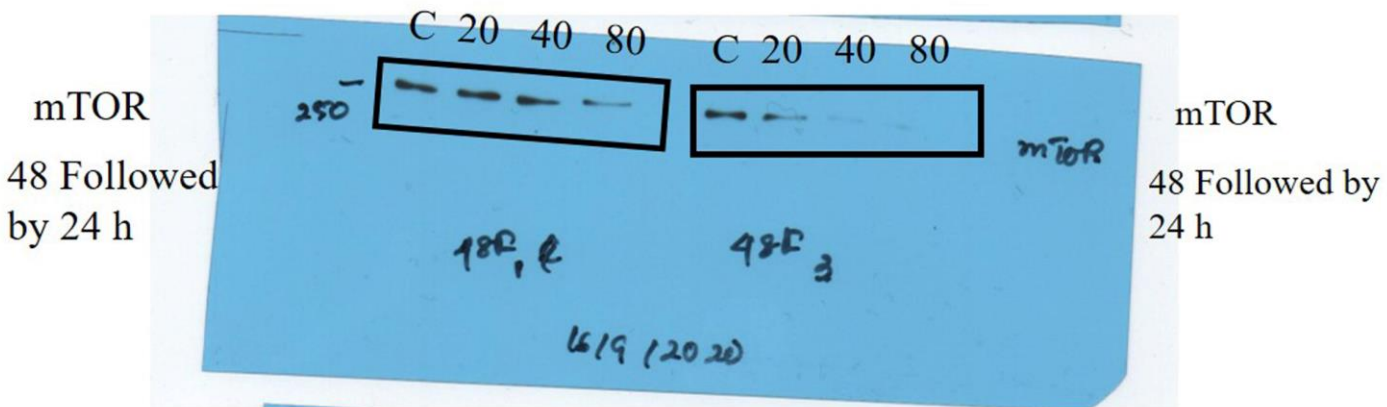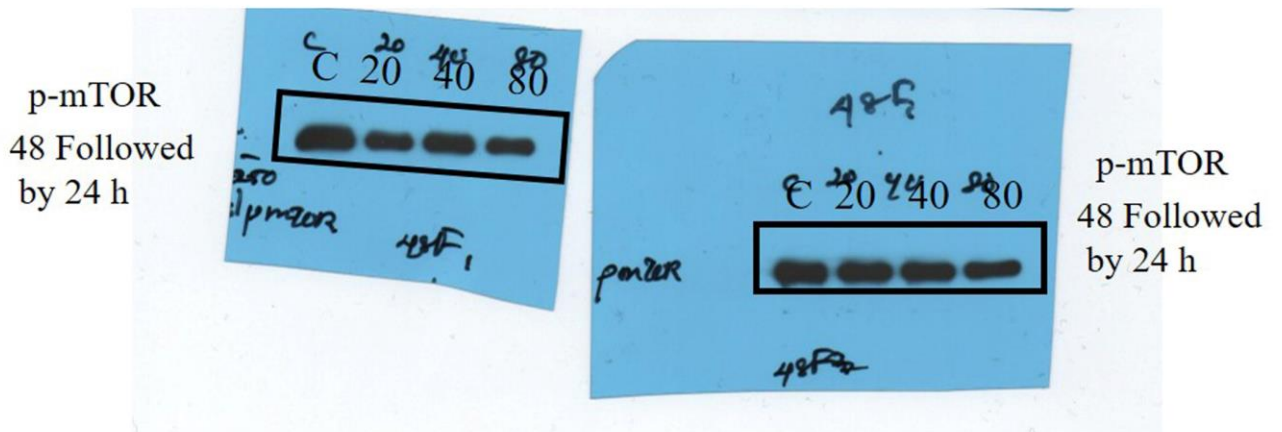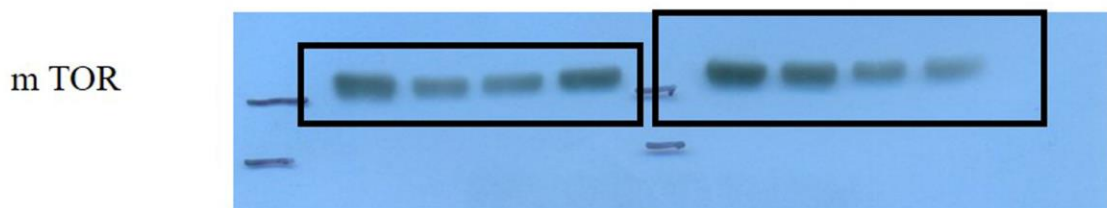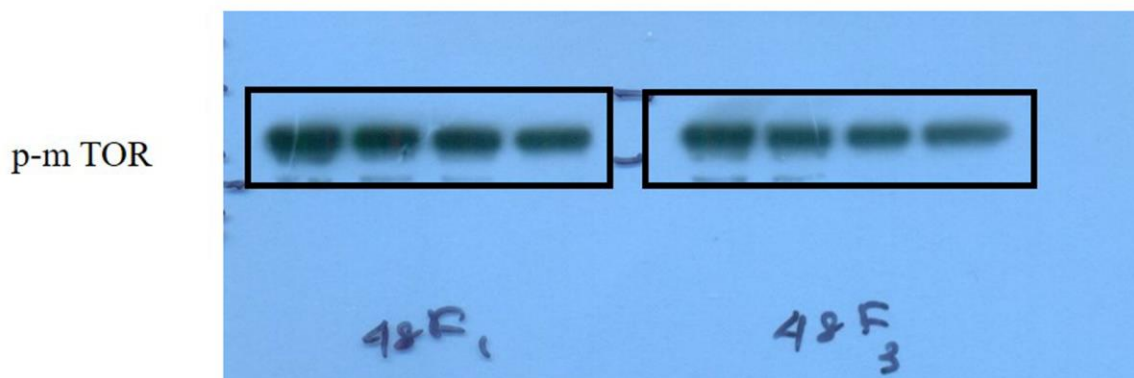

p-m TOR

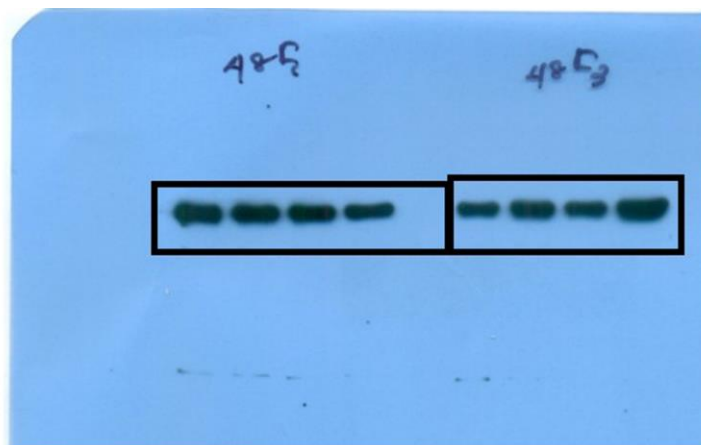

m TOR

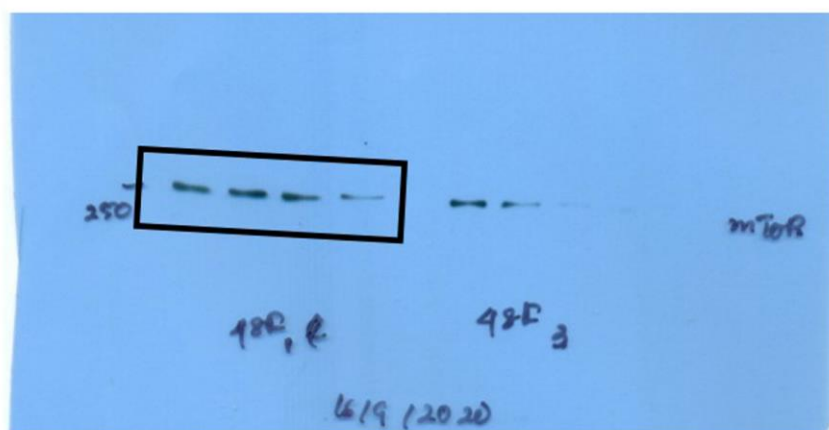

p-m TOR

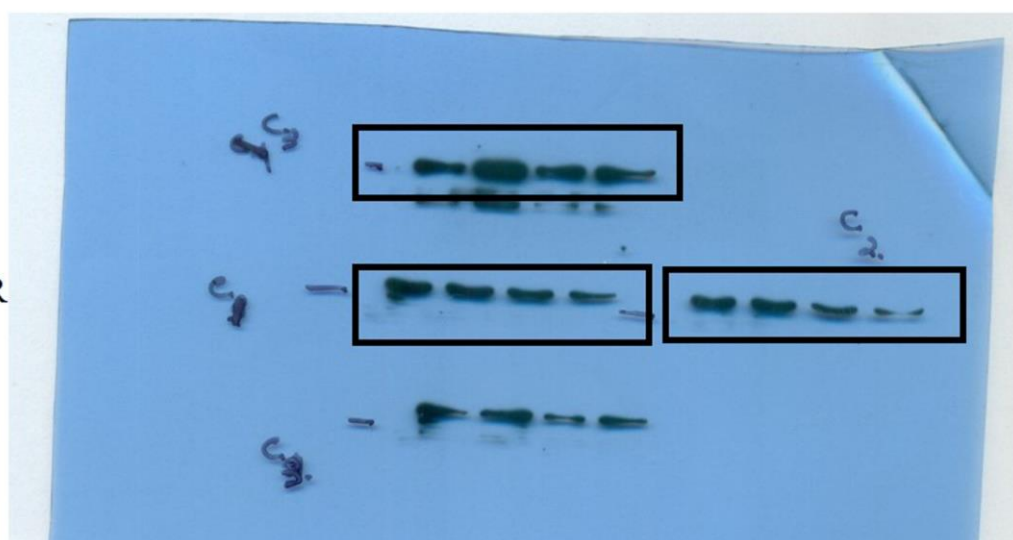



mTOR

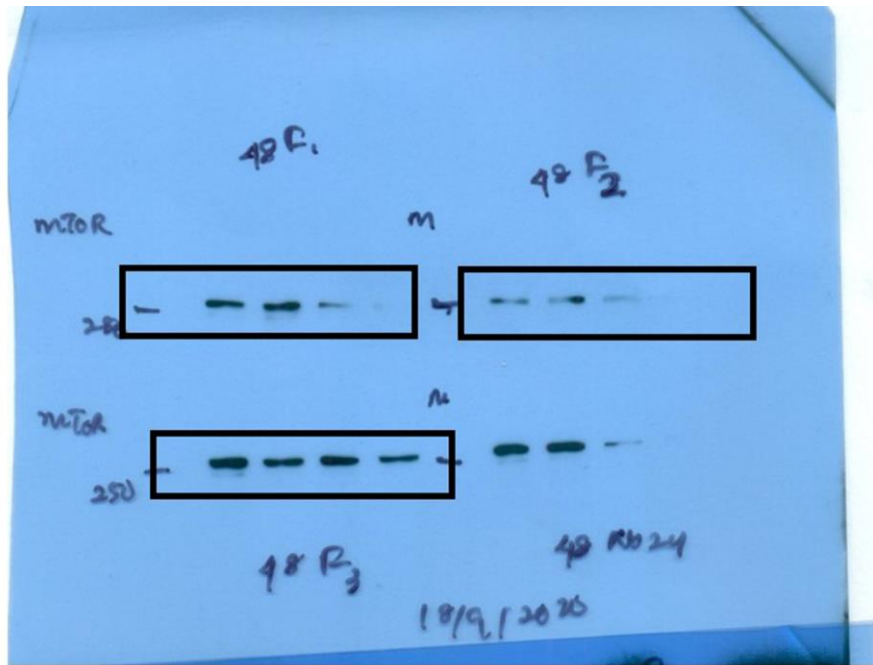

$\beta$ -Actin

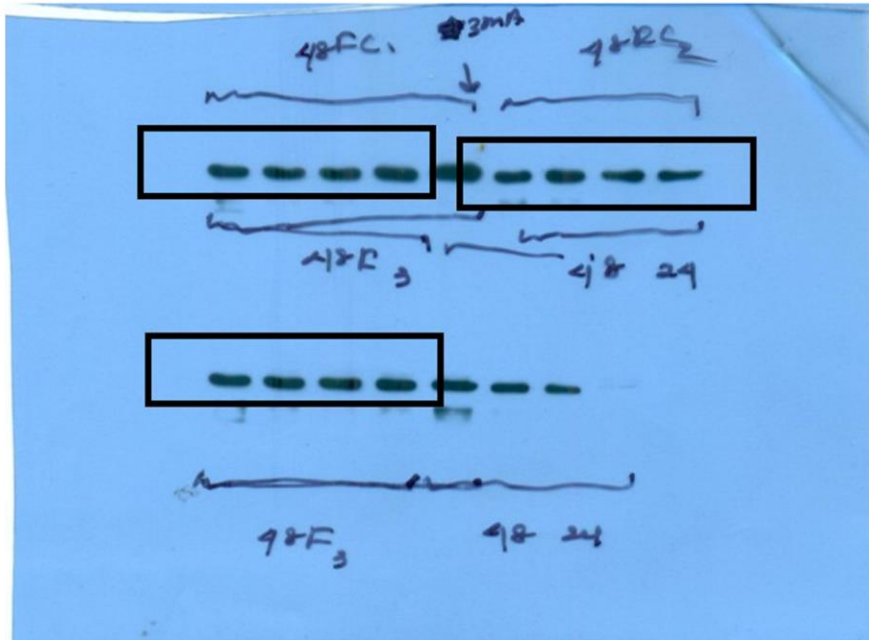

Supplement: 41598_2021_2503_MOESM3_ESM.pdf [file 41598_2021_2503_MOESM3_ESM.pdf]
